# Supplementary material for: Expression and prognosis analysis of TET family in acute myeloid leukemia
Source: publisher site journal article supplement (doi:10.18632/aging.102928), 2020-03-25
Supplement: Supplementary file [file aging-v12i6-102928-supplementary-material-SD1.pdf]

SUPPLEMENTARY FIGURE

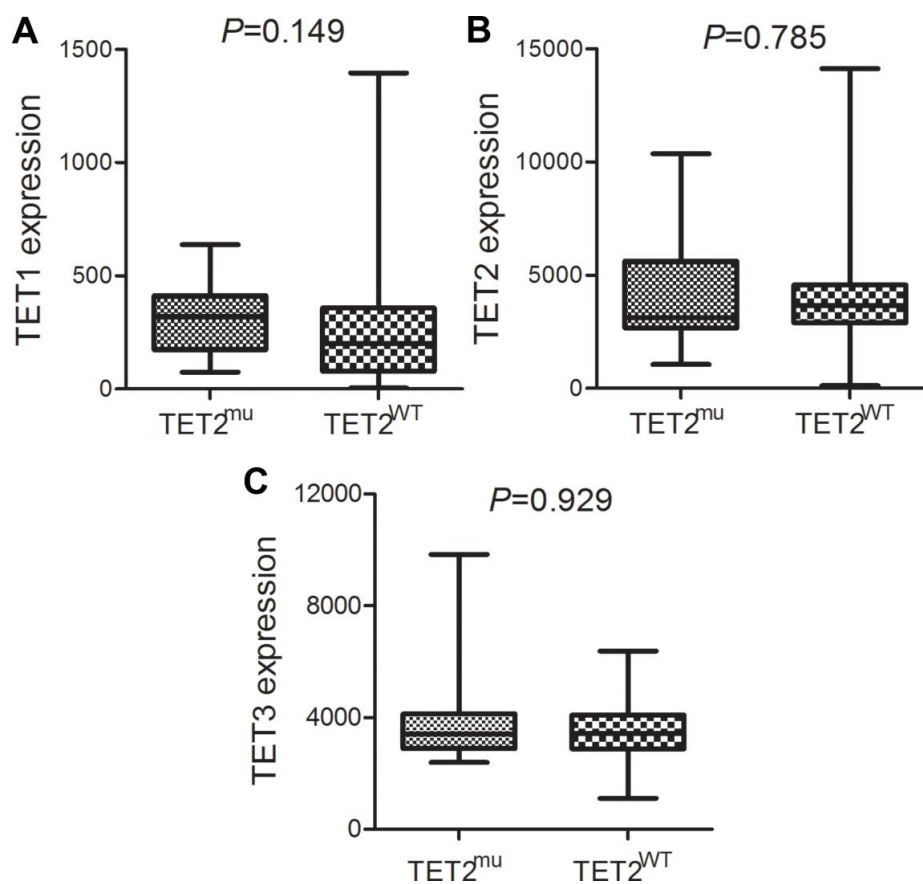

Supplementary Figure 1. The expression of *TETs* in AML patients with and without *TET2* mutation. (A): For *TET1* expression; (B): For *TET2* expression; (C): For *TET3* expression.
