# Supplementary material for: Expression and prognosis analysis of TET family in acute myeloid leukemia
Source: Aging (Albany NY). 2020 Mar 25;12(6):5031–47. doi: 10.18632/aging.102928 (PMC7138570; doi:10.18632/aging.102928)
Supplement: Supplementary Table 1 [file aging-12-102928-s004..xlsx]

## Sheet: TET1 mutation
Hugo Symbol	Entrez Gene Id	Tumor Sample Barcode	Ncbi Build	Chr	Start Position	End Position	Variant Classification	Variant Type	Reference Allele	Tumor Seq Allele	dbSNP ID	Annotation Transcript	Protein Change	CCLE WES alt:ref	CCLE WGS alt:ref	CCLE RNAseq alt:ref	Sanger WES alt:ref	CCLE HC1650 alt:ref	CCLE Raindance alt:ref	ExAC Allelic Fraction	TCGA Hotspot Count
TET1	80312	HCT15_LARGE_INTESTINE	37	10	70332337	70332337	Missense_Mutation	SNP	G	A	NA	ENST00000373644.4	p.R81H	NA	22:18		61:67	249:233	NA	8.236e-06	3
TET1	80312	CW2_LARGE_INTESTINE	37	10	70332337	70332337	Missense_Mutation	SNP	G	A	NA	ENST00000373644.4	p.R81H	NA	NA		99:91	109:76	NA	8.236e-06	3
TET1	80312	HRT18_LARGE_INTESTINE	37	10	70332337	70332337	Missense_Mutation	SNP	G	A	NA	ENST00000373644.4	p.R81H	NA	NA	NA	NA	149:145	NA	8.236e-06	3
TET1	80312	22RV1_PROSTATE	37	10	70333863	70333863	Nonsense_Mutation	SNP	C	T	NA	ENST00000373644.4	p.R590*	56:80	17:23		74:102	377:354	NA	8.236e-06	0
TET1	80312	22RV1_PROSTATE	37	10	70404558	70404558	Missense_Mutation	SNP	C	T	NA	ENST00000373644.4	p.T691I	17:18	12:18	2:7	41:49	417:443	NA	0.0	0
TET1	80312	BL41_HAEMATOPOIETIC_AND_LYMPHOID_TISSUE	37	10	70450669	70450669	Missense_Mutation	SNP	G	T	NA	ENST00000373644.4	p.A1837S	63:66	NA		71:59	67:84	NA	9.884e-05	0
TET1	80312	CL14_LARGE_INTESTINE	37	10	70446432	70446432	Missense_Mutation	SNP	A	G	NA	ENST00000373644.4	p.N1791S	24:79	NA		NA	15:64	NA	4.118e-05	0
TET1	80312	CMLT1_HAEMATOPOIETIC_AND_LYMPHOID_TISSUE	37	10	70451287	70451287	Missense_Mutation	SNP	C	T	NA	ENST00000373644.4	p.R2043C	47:34	NA	26:31	36:31	66:35	NA	0.0	0
TET1	80312	DV90_LUNG	37	10	70450756	70450756	Missense_Mutation	SNP	G	A	NA	ENST00000373644.4	p.A1866T	41:55	NA		NA	107:105	NA	1.647e-05	0
TET1	80312	GSS_STOMACH	37	10	70406668	70406668	Missense_Mutation	SNP	T	A	NA	ENST00000373644.4	p.N1394K	46:80	NA	13:31	NA	78:171	NA	0.0	0
TET1	80312	HCC1143_BREAST	37	10	70405103	70405103	Missense_Mutation	SNP	G	A	NA	ENST00000373644.4	p.V873I	96:57	NA	5:0	102:42	223:94	NA	3.295e-05	0
TET1	80312	HEC108_ENDOMETRIUM	37	10	70333443	70333443	Missense_Mutation	SNP	C	G	NA	ENST00000373644.4	p.P450A	32:26	NA		NA	228:252	NA	1.647e-05	0
TET1	80312	HEC108_ENDOMETRIUM	37	10	70406132	70406132	Missense_Mutation	SNP	T	G	NA	ENST00000373644.4	p.S1216A	32:53	NA		NA	100:139	NA	0.0	0
TET1	80312	HEC108_ENDOMETRIUM	37	10	70446436	70446436	Missense_Mutation	SNP	C	A	NA	ENST00000373644.4	p.N1792K	15:47	NA		NA	28:107	NA	0.0	0
TET1	80312	HEC251_ENDOMETRIUM	37	10	70406328	70406328	Missense_Mutation	SNP	C	T	NA	ENST00000373644.4	p.A1281V	35:50	NA		NA	88:97	NA	0.0	0
TET1	80312	HEC251_ENDOMETRIUM	37	10	70406692	70406692	Missense_Mutation	SNP	C	A	NA	ENST00000373644.4	p.F1402L	43:65	NA		NA	75:102	NA	0.0	0
TET1	80312	HEC251_ENDOMETRIUM	37	10	70406721	70406721	Missense_Mutation	SNP	C	T	NA	ENST00000373644.4	p.S1412F	29:57	NA		NA	73:74	NA	0.0	0
TET1	80312	HEC251_ENDOMETRIUM	37	10	70441195	70441195	Nonsense_Mutation	SNP	C	T	NA	ENST00000373644.4	p.R1622*	25:41	NA	2:5	NA	81:78	NA	0.0	0
TET1	80312	HEC59_ENDOMETRIUM	37	10	70405894	70405894	Silent	SNP	T	C	NA	ENST00000373644.4	p.G1136G	13:48	NA		NA	21:67	NA	8.237e-06	0
TET1	80312	HEC59_ENDOMETRIUM	37	10	70406501	70406501	Missense_Mutation	SNP	G	A	NA	ENST00000373644.4	p.G1339S	31:80	NA	7:15	NA	89:311	NA	0.0	0
TET1	80312	HEC59_ENDOMETRIUM	37	10	70426831	70426831	Silent	SNP	A	G	NA	ENST00000373644.4	p.K1497K	26:30	NA	14:17	NA	10:4	NA	0.0	0
TET1	80312	HT55_LARGE_INTESTINE	37	10	70332653	70332653	Missense_Mutation	SNP	A	T	NA	ENST00000373644.4	p.Q186H	42:30	NA		34:26	19:16	NA	0.0	0
TET1	80312	HT_HAEMATOPOIETIC_AND_LYMPHOID_TISSUE	37	10	70405156	70405156	Silent	SNP	A	G	NA	ENST00000373644.4	p.Q890Q	151:450	NA	3:5	147:499	56:157	NA	0.0	0
TET1	80312	JHUEM7_ENDOMETRIUM	37	10	70404649	70404649	Missense_Mutation	SNP	C	A	NA	ENST00000373644.4	p.H721Q	11:16	NA		NA	77:96	NA	0.0	0
TET1	80312	JHUEM7_ENDOMETRIUM	37	10	70404832	70404832	Silent	SNP	C	T	NA	ENST00000373644.4	p.F782F	11:12	NA		NA	57:75	NA	0.0	0
TET1	80312	JHUEM7_ENDOMETRIUM	37	10	70405744	70405744	Silent	SNP	G	A	NA	ENST00000373644.4	p.S1086S	33:42	NA		NA	71:76	NA	2.471e-05	0
TET1	80312	JHUEM7_ENDOMETRIUM	37	10	70406692	70406692	Missense_Mutation	SNP	C	A	NA	ENST00000373644.4	p.F1402L	39:37	NA		NA	60:55	NA	0.0	0
TET1	80312	MDAPCA2B_PROSTATE	37	10	70333429	70333429	Missense_Mutation	SNP	C	G	NA	ENST00000373644.4	p.A445G	16:67	NA		NA	77:228	NA	0.0	0
TET1	80312	NCIH1184_LUNG	37	10	70412301	70412301	Missense_Mutation	SNP	T	A	NA	ENST00000373644.4	p.Y1471N	55:0	10:0	29:0	NA	83:1	NA	0.0	0
TET1	80312	OVMANA_OVARY	37	10	70450941	70450941	Silent	SNP	C	T	NA	ENST00000373644.4	p.S1927S	21:75	NA	2:3	NA	28:78	NA	0.0	0
TET1	80312	PEER_HAEMATOPOIETIC_AND_LYMPHOID_TISSUE	37	10	70333034	70333034	Silent	SNP	C	T	NA	ENST00000373644.4	p.N313N	62:61	NA		NA	108:104	NA	0.0	0
TET1	80312	SEM_HAEMATOPOIETIC_AND_LYMPHOID_TISSUE	37	10	70450875	70450875	Silent	SNP	C	T	NA	ENST00000373644.4	p.G1905G	29:33	NA		NA	110:132	NA	8.236e-06	0
TET1	80312	SNU175_LARGE_INTESTINE	37	10	70446282	70446282	Missense_Mutation	SNP	G	A	NA	ENST00000373644.4	p.R1741H	36:38	NA		36:40	51:57	NA	3.295e-05	0
TET1	80312	SNU46_UPPER_AERODIGESTIVE_TRACT	37	10	70332127	70332127	Missense_Mutation	SNP	G	C	NA	ENST00000373644.4	p.R11T	20:23	NA		NA	20:19	NA	0.0	0
TET1	80312	SNU738_CENTRAL_NERVOUS_SYSTEM	37	10	70451046	70451046	Missense_Mutation	SNP	G	T	NA	ENST00000373644.4	p.Q1962H	26:82	NA		NA	31:46	NA	0.0	0
TET1	80312	SNU886_LIVER	37	10	70333443	70333443	Missense_Mutation	SNP	C	G	NA	ENST00000373644.4	p.P450A	36:43	NA		NA	136:144	NA	1.647e-05	0
TET1	80312	SUDHL10_HAEMATOPOIETIC_AND_LYMPHOID_TISSUE	37	10	70406680	70406680	Silent	SNP	T	C	NA	ENST00000373644.4	p.Y1398Y	47:54	NA		21:25	59:88	NA	0.0	0
TET1	80312	SUPHD1_HAEMATOPOIETIC_AND_LYMPHOID_TISSUE	37	10	70451319	70451319	Silent	SNP	C	T	NA	ENST00000373644.4	p.N2053N	44:40	NA	NA	29:29	27:33	NA	0.0	0
TET1	80312	TUHR4TKB_KIDNEY	37	10	70333355	70333355	Silent	SNP	T	A	NA	ENST00000373644.4	p.G420G	53:74	NA		NA	98:96	NA	0.0	0
TET1	80312	YD8_UPPER_AERODIGESTIVE_TRACT	37	10	70332982	70332982	Missense_Mutation	SNP	G	T	NA	ENST00000373644.4	p.C296F	25:127	NA		NA	35:182	NA	0.0	0
TET1	80312	DMS53_LUNG	37	10	70333869	70333869	Missense_Mutation	SNP	G	T	NA	ENST00000373644.4	p.G592W	NA	21:49		56:56	61:86	NA	0.0	0
TET1	80312	DMS53_LUNG	37	10	70333870	70333870	Missense_Mutation	SNP	G	T	NA	ENST00000373644.4	p.G592V	NA	21:49		54:52	63:85	NA	0.0	0
TET1	80312	DMS53_LUNG	37	10	70432753	70432753	Missense_Mutation	SNP	G	T	NA	ENST00000373644.4	p.R1592I	NA	3:7		40:48	56:81	NA	0.0	0
TET1	80312	HCT15_LARGE_INTESTINE	37	10	70332625	70332625	Missense_Mutation	SNP	A	C	NA	ENST00000373644.4	p.N177T	NA	19:25		53:48	211:214	NA	0.0	0
TET1	80312	HCT15_LARGE_INTESTINE	37	10	70333431	70333431	Missense_Mutation	SNP	C	T	NA	ENST00000373644.4	p.P446S	NA	21:24		39:30	424:461	NA	0.0	0
TET1	80312	HCT15_LARGE_INTESTINE	37	10	70406109	70406109	Missense_Mutation	SNP	C	T	NA	ENST00000373644.4	p.T1208I	NA	19:16		62:61	284:285	NA	0.0	0
TET1	80312	HCT15_LARGE_INTESTINE	37	10	70450989	70450989	Silent	SNP	C	A	NA	ENST00000373644.4	p.P1943P	NA	20:18		46:31	147:146	NA	0.0	0
TET1	80312	KNS62_LUNG	37	10	70405700	70405700	Nonsense_Mutation	SNP	C	T	NA	ENST00000373644.4	p.Q1072*	NA	41:0		190:1	167:0	NA	0.0	0
TET1	80312	NCIH510_LUNG	37	10	70446360	70446360	Missense_Mutation	SNP	C	T	NA	ENST00000373644.4	p.A1767V	NA	13:32	43:123	51:113	33:58	NA	0.0	0
TET1	80312	RERFGC1B_STOMACH	37	10	70332888	70332888	Missense_Mutation	SNP	A	G	NA	ENST00000373644.4	p.N265D	NA	33:0		70:0	157:0	NA	0.0	0
TET1	80312	SW480_LARGE_INTESTINE	37	10	70332814	70332814	Missense_Mutation	SNP	C	A	NA	ENST00000373644.4	p.P240Q	NA	14:29		NA	50:62	NA	0.0	0
TET1	80312	BT474_BREAST	37	10	70333510	70333510	Missense_Mutation	SNP	G	A	NA	ENST00000373644.4	p.G472D	NA	6:30		6:41		NA	0.0	0
TET1	80312	GP2D_LARGE_INTESTINE	37	10	70333081	70333081	Missense_Mutation	SNP	T	C	NA	ENST00000373644.4	p.F329S	NA	27:31		NA	87:180	NA	0.0	0
TET1	80312	HCC1419_BREAST	37	10	70332297	70332297	Missense_Mutation	SNP	G	A	NA	ENST00000373644.4	p.V68M	NA	4:14		39:158	18:37	NA	2.471e-05	0
TET1	80312	HEC1A_ENDOMETRIUM	37	10	70333620	70333620	Missense_Mutation	SNP	C	T	NA	ENST00000373644.4	p.P509S	NA	26:26		NA	43:36	NA	8.237e-06	0
TET1	80312	HT115_LARGE_INTESTINE	37	10	70404489	70404489	Missense_Mutation	SNP	A	C	NA	ENST00000373644.4	p.K668T	NA	22:23		55:63	64:70	NA	0.0	0
TET1	80312	HT115_LARGE_INTESTINE	37	10	70405915	70405915	Missense_Mutation	SNP	G	T	NA	ENST00000373644.4	p.K1143N	NA	14:11		61:61	31:48	NA	0.0	0
TET1	80312	HT115_LARGE_INTESTINE	37	10	70406089	70406089	Silent	SNP	T	C	NA	ENST00000373644.4	p.F1201F	NA	18:17		114:95	91:90	NA	0.0	0
TET1	80312	HT115_LARGE_INTESTINE	37	10	70446393	70446393	Missense_Mutation	SNP	T	G	NA	ENST00000373644.4	p.I1778S	NA	7:22		108:90	33:40	NA	0.0	0
TET1	80312	IGROV1_OVARY	37	10	70451450	70451450	Missense_Mutation	SNP	A	G	NA	ENST00000373644.4	p.E2097G	NA	5:28				NA	0.0	0
TET1	80312	KM12_LARGE_INTESTINE	37	10	70450806	70450806	Silent	SNP	G	A	NA	ENST00000373644.4	p.T1882T	NA	16:13		44:39	48:40	NA	0.0	0
TET1	80312	KYM1_SOFT_TISSUE	37	10	70332974	70332974	Missense_Mutation	SNP	A	T	NA	ENST00000373644.4	p.E293D	NA	22:14	11:12	52:73	120:115	NA	0.0	0
TET1	80312	LS411N_LARGE_INTESTINE	37	10	70411666	70411666	Missense_Mutation	SNP	C	T	NA	ENST00000373644.4	p.A1447V	NA	9:42			34:214	NA	0.0	0
TET1	80312	LS411N_LARGE_INTESTINE	37	10	70432796	70432796	Silent	SNP	C	A	NA	ENST00000373644.4	p.P1606P	NA	10:18		34:104	41:118	NA	0.0	0
TET1	80312	MDAMB157_BREAST	37	10	70404784	70404784	Silent	SNP	A	G	NA	ENST00000373644.4	p.L766L	NA	20:0	7:0	46:0	254:2	NA	4.942e-05	0
TET1	80312	MDAMB453_BREAST	37	10	70404934	70404934	Silent	SNP	C	G	NA	ENST00000373644.4	p.L816L	NA	5:20			130:612	NA	0.0	0
TET1	80312	MDAMB453_BREAST	37	10	70450954	70450954	Missense_Mutation	SNP	G	A	NA	ENST00000373644.4	p.E1932K	NA	16:16		64:63	65:49	NA	0.0	0
TET1	80312	MDAMB453_BREAST	37	10	70451110	70451110	Missense_Mutation	SNP	G	A	NA	ENST00000373644.4	p.E1984K	NA	19:18		81:79	196:220	NA	0.0	0
TET1	80312	MFE319_ENDOMETRIUM	37	10	70405077	70405077	Missense_Mutation	SNP	G	A	NA	ENST00000373644.4	p.S864N	NA	22:32	2:3	156:328	51:127	NA	0.0	0
TET1	80312	SKMEL2_SKIN	37	10	70412302	70412302	Missense_Mutation	SNP	A	G	NA	ENST00000373644.4	p.Y1471C	NA	20:18	NA	30:33	38:39	NA	0.0	0
TET1	80312	SW48_LARGE_INTESTINE	37	10	70405805	70405805	Missense_Mutation	SNP	C	T	NA	ENST00000373644.4	p.L1107F	NA	13:34		32:79	312:539	NA	0.0	0
TET1	80312	TE1_OESOPHAGUS	37	10	70332120	70332120	Missense_Mutation	SNP	C	T	NA	ENST00000373644.4	p.P9S	NA	8:35				NA	0.0	0
TET1	80312	CAL12T_LUNG	37	10	70333505	70333505	Silent	SNP	T	A	NA	ENST00000373644.4	p.P470P	NA	NA		47:17	246:126	NA	0.0	0
TET1	80312	CCRFCEM_HAEMATOPOIETIC_AND_LYMPHOID_TISSUE	37	10	70406220	70406220	Missense_Mutation	SNP	A	G	NA	ENST00000373644.4	p.Q1245R	NA	NA	NA	41:74	NA	NA	0.0	0
TET1	80312	CHSA0108_BONE	37	10	70405451	70405451	Missense_Mutation	SNP	G	A	NA	ENST00000373644.4	p.A989T	NA	NA	NA	29:40	NA	NA	8.236e-06	0
TET1	80312	CL34_LARGE_INTESTINE	37	10	70432758	70432758	Missense_Mutation	SNP	C	T	NA	ENST00000373644.4	p.P1594S	NA	NA		96:85	47:52	NA	0.0	0
TET1	80312	COLO800_SKIN	37	10	70406541	70406541	Missense_Mutation	SNP	C	G	NA	ENST00000373644.4	p.T1352S	NA	NA		77:7	NA	NA	8.236e-06	0
TET1	80312	CW2_LARGE_INTESTINE	37	10	70446390	70446390	Missense_Mutation	SNP	C	A	NA	ENST00000373644.4	p.P1777H	NA	NA		44:55	70:56	NA	0.0	0
TET1	80312	DG75_HAEMATOPOIETIC_AND_LYMPHOID_TISSUE	37	10	70333837	70333837	Missense_Mutation	SNP	C	T	NA	ENST00000373644.4	p.P581L	NA	NA	NA	105:110	NA	NA	1.647e-05	0
TET1	80312	EN_ENDOMETRIUM	37	10	70332439	70332439	Missense_Mutation	SNP	T	C	NA	ENST00000373644.4	p.L115P	NA	NA	6:4	29:28	105:109	NA	0.0	0
TET1	80312	FLO1_OESOPHAGUS	37	10	70333516	70333516	Missense_Mutation	SNP	G	A	NA	ENST00000373644.4	p.G474E	NA	NA	NA	47:43	NA	NA	0.0	0
TET1	80312	GCT_SOFT_TISSUE	37	10	70405872	70405872	Missense_Mutation	SNP	C	T	NA	ENST00000373644.4	p.S1129L	NA	NA	6:0	71:0	206:0	NA	0.0	0
TET1	80312	GP5D_LARGE_INTESTINE	37	10	70446417	70446417	Missense_Mutation	SNP	A	G	NA	ENST00000373644.4	p.N1786S	NA	NA	NA	51:136	NA	NA	0.0	0
TET1	80312	HCC2998_LARGE_INTESTINE	37	10	70333106	70333106	Silent	SNP	G	A	NA	ENST00000373644.4	p.A337A	NA	NA	NA	107:100	NA	NA	0.0	0
TET1	80312	HDLM2_HAEMATOPOIETIC_AND_LYMPHOID_TISSUE	37	10	70332262	70332262	Missense_Mutation	SNP	G	A	NA	ENST00000373644.4	p.R56K	NA	NA		105:113	148:162	NA	0.0	0
TET1	80312	HEC1_ENDOMETRIUM	37	10	70333620	70333620	Missense_Mutation	SNP	C	T	NA	ENST00000373644.4	p.P509S	NA	NA	NA	21:45	NA	NA	8.237e-06	0
TET1	80312	HT115_LARGE_INTESTINE	37	10	70333611	70333611	Missense_Mutation	SNP	A	C	NA	ENST00000373644.4	p.S506R	NA			42:49	32:29	NA	0.0	0
TET1	80312	KARPAS45_HAEMATOPOIETIC_AND_LYMPHOID_TISSUE	37	10	70405410	70405410	Missense_Mutation	SNP	C	T	NA	ENST00000373644.4	p.T975I	NA	NA	NA	16:63	NA	NA	0.0	0
TET1	80312	KARPAS45_HAEMATOPOIETIC_AND_LYMPHOID_TISSUE	37	10	70442644	70442644	Missense_Mutation	SNP	C	T	NA	ENST00000373644.4	p.R1656C	NA	NA	NA	34:127	NA	NA	0.0	0
TET1	80312	KARPAS45_HAEMATOPOIETIC_AND_LYMPHOID_TISSUE	37	10	70451518	70451518	Missense_Mutation	SNP	G	A	NA	ENST00000373644.4	p.V2120M	NA	NA	NA	146:125	NA	NA	0.0	0
TET1	80312	KG1_HAEMATOPOIETIC_AND_LYMPHOID_TISSUE	37	10	70333629	70333629	Missense_Mutation	SNP	A	G	NA	ENST00000373644.4	p.T512A	NA	NA		27:35	70:76	NA	8.237e-06	0
TET1	80312	KMRC20_KIDNEY	37	10	70333057	70333057	Missense_Mutation	SNP	C	T	NA	ENST00000373644.4	p.T321M	NA	NA		48:66	115:112	NA	1.647e-05	0
TET1	80312	KYSE50_OESOPHAGUS	37	10	70450655	70450655	Missense_Mutation	SNP	C	T	NA	ENST00000373644.4	p.S1832L	NA	NA	NA	83:58	NA	NA	1.647e-05	0
TET1	80312	L428_HAEMATOPOIETIC_AND_LYMPHOID_TISSUE	37	10	70406082	70406082	Missense_Mutation	SNP	G	A	NA	ENST00000373644.4	p.G1199E	NA	NA		24:71	40:123	NA	0.0	0
TET1	80312	LC1SQSF_LUNG	37	10	70333248	70333248	Missense_Mutation	SNP	C	T	NA	ENST00000373644.4	p.H385Y	NA	NA	NA	22:127	52:199	NA	8.236e-06	0
TET1	80312	LIM1215_LARGE_INTESTINE	37	10	70446451	70446451	Silent	SNP	A	G	NA	ENST00000373644.4	p.S1797S	NA	NA	NA	25:25	NA	NA	0.0	0
TET1	80312	MCC13_SKIN	37	10	70332531	70332531	Missense_Mutation	SNP	C	T	NA	ENST00000373644.4	p.P146S	NA	NA	NA	78:105	NA	NA	0.0	0
TET1	80312	MEWO_SKIN	37	10	70333187	70333187	Silent	SNP	C	T	NA	ENST00000373644.4	p.F364F	NA	NA		95:98	77:77	NA	0.0	0
TET1	80312	MEWO_SKIN	37	10	70333605	70333605	Missense_Mutation	SNP	C	T	NA	ENST00000373644.4	p.H504Y	NA	NA		26:24	44:37	NA	0.0	0
TET1	80312	MEWO_SKIN	37	10	70333732	70333732	Missense_Mutation	SNP	C	T	NA	ENST00000373644.4	p.S546F	NA	NA		62:57	72:82	NA	8.236e-06	0
TET1	80312	MEWO_SKIN	37	10	70405356	70405356	Missense_Mutation	SNP	C	T	NA	ENST00000373644.4	p.P957L	NA	NA		52:49	43:45	NA	0.0	0
TET1	80312	MFM223_BREAST	37	10	70451005	70451005	Missense_Mutation	SNP	C	T	NA	ENST00000373644.4	p.P1949S	NA	NA	NA	44:58	NA	NA	0.0	0
TET1	80312	MLMA_HAEMATOPOIETIC_AND_LYMPHOID_TISSUE	37	10	70450664	70450664	Missense_Mutation	SNP	C	T	NA	ENST00000373644.4	p.P1835L	NA	NA	NA	54:71	NA	NA	2.471e-05	0
TET1	80312	MN60_HAEMATOPOIETIC_AND_LYMPHOID_TISSUE	37	10	70332548	70332548	Silent	SNP	G	A	NA	ENST00000373644.4	p.K151K	NA	NA	NA	38:48	NA	NA	0.0	0
TET1	80312	MOLT4_HAEMATOPOIETIC_AND_LYMPHOID_TISSUE	37	10	70332415	70332415	Missense_Mutation	SNP	G	A	NA	ENST00000373644.4	p.R107Q	NA	NA	NA	26:74	79:277	NA	0.0	0
TET1	80312	MOLT4_HAEMATOPOIETIC_AND_LYMPHOID_TISSUE	37	10	70406389	70406389	Silent	SNP	G	A	NA	ENST00000373644.4	p.Q1301Q	NA	NA	NA	23:92	93:367	NA	0.0	0
TET1	80312	MRKNU1_BREAST	37	10	70450664	70450664	Missense_Mutation	SNP	C	T	NA	ENST00000373644.4	p.P1835L	NA	NA	NA	58:4	NA	NA	2.471e-05	0
TET1	80312	MS1_SKIN	37	10	70332790	70332790	Missense_Mutation	SNP	C	A	NA	ENST00000373644.4	p.T232K	NA	NA	NA	30:17	NA	NA	3.295e-05	0
TET1	80312	NB17_AUTONOMIC_GANGLIA	37	10	70332463	70332463	Missense_Mutation	SNP	C	A	NA	ENST00000373644.4	p.A123D	NA	NA	NA	40:84	NA	NA	0.0	0
TET1	80312	NB17_AUTONOMIC_GANGLIA	37	10	70332609	70332609	Missense_Mutation	SNP	C	A	NA	ENST00000373644.4	p.L172I	NA	NA	NA	29:77	NA	NA	0.0	0
TET1	80312	NCIH1623_LUNG	37	10	70333887	70333887	Missense_Mutation	SNP	C	A	NA	ENST00000373644.4	p.Q598K	NA	NA		47:46	53:92	NA	0.0	0
TET1	80312	NCIH1623_LUNG	37	10	70450713	70450713	Silent	SNP	C	G	NA	ENST00000373644.4	p.S1851S	NA	NA		34:29	50:56	NA	0.0	0
TET1	80312	NCIH1781_LUNG	37	10	70451383	70451383	Missense_Mutation	SNP	A	T	NA	ENST00000373644.4	p.N2075Y	NA	NA	2:2	29:61	48:85	NA	0.0	0
TET1	80312	NCIH1838_LUNG	37	10	70332144	70332144	Missense_Mutation	SNP	G	A	NA	ENST00000373644.4	p.D17N	NA	NA	3:4	14:21	13:8	NA	0.0	0
TET1	80312	NCIH2110_LUNG	37	10	70432714	70432714	Missense_Mutation	SNP	G	A	NA	ENST00000373644.4	p.C1579Y	NA	NA	13:15	87:156	30:79	NA	0.0	0
TET1	80312	NCIH513_PLEURA	37	10	70405188	70405188	Nonsense_Mutation	SNP	C	G	NA	ENST00000373644.4	p.S901*	NA	NA	NA	99:109	NA	NA	0.0	0
TET1	80312	NCIH513_PLEURA	37	10	70426837	70426837	Silent	SNP	T	C	NA	ENST00000373644.4	p.L1499L	NA	NA	NA	25:0	NA	NA	0.0	0
TET1	80312	NCIH630_LARGE_INTESTINE	37	10	70333037	70333037	Silent	SNP	C	T	NA	ENST00000373644.4	p.C314C	NA	NA	NA	26:67	NA	NA	0.0	0
TET1	80312	NCIH630_LARGE_INTESTINE	37	10	70333804	70333804	Missense_Mutation	SNP	G	A	NA	ENST00000373644.4	p.S570N	NA	NA	NA	49:75	NA	NA	0.0	0
TET1	80312	RCCAB_KIDNEY	37	10	70405013	70405013	Missense_Mutation	SNP	A	T	NA	ENST00000373644.4	p.I843L	NA	NA	NA	72:67	NA	NA	0.0	0
TET1	80312	RCHACV_HAEMATOPOIETIC_AND_LYMPHOID_TISSUE	37	10	70332566	70332566	Silent	SNP	G	A	NA	ENST00000373644.4	p.S157S	NA	NA		42:53	39:39	NA	8.236e-06	0
TET1	80312	RS411_HAEMATOPOIETIC_AND_LYMPHOID_TISSUE	37	10	70406353	70406353	Silent	SNP	G	A	NA	ENST00000373644.4	p.T1289T	NA	NA		38:41	104:127	NA	1.647e-05	0
TET1	80312	SBC1_LUNG	37	10	70333887	70333887	Missense_Mutation	SNP	C	A	NA	ENST00000373644.4	p.Q598K	NA	NA	NA	36:43	NA	NA	0.0	0
TET1	80312	SNU1040_LARGE_INTESTINE	37	10	70406178	70406178	Missense_Mutation	SNP	A	G	NA	ENST00000373644.4	p.Q1231R	NA	NA	8:6	43:59	111:125	NA	0.0	0
TET1	80312	SNU1040_LARGE_INTESTINE	37	10	70450774	70450774	Missense_Mutation	SNP	T	G	NA	ENST00000373644.4	p.F1872V	NA	NA	12:9	45:65	79:84	NA	0.0	0
TET1	80312	SNU1040_LARGE_INTESTINE	37	10	70451245	70451245	Missense_Mutation	SNP	G	A	NA	ENST00000373644.4	p.A2029T	NA	NA		18:68		NA	0.0	0
TET1	80312	SNU81_LARGE_INTESTINE	37	10	70333068	70333068	Missense_Mutation	SNP	T	C	NA	ENST00000373644.4	p.S325P	NA	NA		81:117	86:95	NA	2.471e-05	0
TET1	80312	SNU81_LARGE_INTESTINE	37	10	70446192	70446192	Missense_Mutation	SNP	A	G	NA	ENST00000373644.4	p.Y1711C	NA	NA		69:67	90:77	NA	0.0	0
TET1	80312	SNU81_LARGE_INTESTINE	37	10	70451546	70451546	Missense_Mutation	SNP	C	T	NA	ENST00000373644.4	p.A2129V	NA	NA		112:111	64:57	NA	0.0	0
TET1	80312	TE11_OESOPHAGUS	37	10	70333187	70333187	Silent	SNP	C	T	NA	ENST00000373644.4	p.F364F	NA			59:160		NA	0.0	0
TET1	80312	TMK1_STOMACH	37	10	70446227	70446227	Missense_Mutation	SNP	G	A	NA	ENST00000373644.4	p.E1723K	NA	NA	NA	16:65	NA	NA	8.236e-06	0
TET1	80312	WIL2NS_HAEMATOPOIETIC_AND_LYMPHOID_TISSUE	37	10	70411655	70411655	Silent	SNP	A	G	NA	ENST00000373644.4	p.G1443G	NA	NA	NA	104:130	NA	NA	0.0	0
TET1	80312	HA7EBV_MATCHED_NORMAL_TISSUE	37	10	70446235	70446235	Missense_Mutation	SNP	G	C	NA	ENST00000373644.4	p.M1725I	NA	NA	NA	65:71	NA	NA	0.0	0
TET1	80312	HA7RCC_KIDNEY	37	10	70446235	70446235	Missense_Mutation	SNP	G	C	NA	ENST00000373644.4	p.M1725I	NA	NA	NA	42:35	NA	NA	0.0	0
TET1	80312	HCC1143_MATCHED_NORMAL_TISSUE	37	10	70405103	70405103	Missense_Mutation	SNP	G	A	NA	ENST00000373644.4	p.V873I	NA	NA	NA	156:142	NA	NA	3.295e-05	0
TET1	80312	LB1047EBV_MATCHED_NORMAL_TISSUE	37	10	70412328	70412328	Missense_Mutation	SNP	C	T	NA	ENST00000373644.4	p.H1480Y	NA	NA	NA	44:51	NA	NA	0.0	0
TET1	80312	LB1047RCC_KIDNEY	37	10	70412328	70412328	Missense_Mutation	SNP	C	T	NA	ENST00000373644.4	p.H1480Y	NA	NA	NA	45:17	NA	NA	0.0	0
TET1	80312	LC1SQ_LUNG	37	10	70333248	70333248	Missense_Mutation	SNP	C	T	NA	ENST00000373644.4	p.H385Y	NA	NA	NA	22:127	NA	NA	8.236e-06	0
TET1	80312	MS1_LUNG	37	10	70332790	70332790	Missense_Mutation	SNP	C	A	NA	ENST00000373644.4	p.T232K	NA	NA	NA	30:17	NA	NA	3.295e-05	0
TET1	80312	NCIH2342_LUNG	37	10	70446408	70446408	Missense_Mutation	SNP	G	A	NA	ENST00000373644.4	p.R1783Q	NA	NA		14:123	11:82	NA	0.0	0
TET1	80312	COLO818_SKIN	37	10	70406541	70406541	Missense_Mutation	SNP	C	G	NA	ENST00000373644.4	p.T1352S	NA	NA	NA	NA	228:0	NA	8.236e-06	0
TET1	80312	GSU_STOMACH	37	10	70450965	70450965	Silent	SNP	G	A	NA	ENST00000373644.4	p.T1935T		NA		NA	7:45	NA	8.236e-06	0
TET1	80312	HEC1B_ENDOMETRIUM	37	10	70333620	70333620	Missense_Mutation	SNP	C	T	NA	ENST00000373644.4	p.P509S	NA	NA		NA	21:52	NA	8.237e-06	0
TET1	80312	HEC251_ENDOMETRIUM	37	10	70406667	70406667	Missense_Mutation	SNP	A	C	NA	ENST00000373644.4	p.N1394T		NA		NA	19:167	NA	0.0	0
TET1	80312	HRT18_LARGE_INTESTINE	37	10	70332625	70332625	Missense_Mutation	SNP	A	C	NA	ENST00000373644.4	p.N177T	NA	NA	NA	NA	80:116	NA	0.0	0
TET1	80312	HRT18_LARGE_INTESTINE	37	10	70333431	70333431	Missense_Mutation	SNP	C	T	NA	ENST00000373644.4	p.P446S	NA	NA	NA	NA	190:171	NA	0.0	0
TET1	80312	HRT18_LARGE_INTESTINE	37	10	70406109	70406109	Missense_Mutation	SNP	C	T	NA	ENST00000373644.4	p.T1208I	NA	NA	NA	NA	93:104	NA	0.0	0
TET1	80312	HRT18_LARGE_INTESTINE	37	10	70411644	70411644	Missense_Mutation	SNP	C	A	NA	ENST00000373644.4	p.L1440I	NA	NA	NA	NA	18:143	NA	0.0	0
TET1	80312	LOVO_LARGE_INTESTINE	37	10	70405251	70405251	Missense_Mutation	SNP	G	T	NA	ENST00000373644.4	p.R922I	NA				12:83	NA	0.0	0
TET1	80312	OC316_OVARY	37	10	70441245	70441245	Splice_Site	SNP	G	T	NA	ENST00000373644.4	p.Q1638H	NA	NA	NA	NA	8:63	NA	0.0	0
TET1	80312	SNU1040_LARGE_INTESTINE	37	10	70404745	70404745	Silent	SNP	A	G	NA	ENST00000373644.4	p.V753V	NA	NA			87:112	NA	0.0	0
TET1	80312	SNU1272_KIDNEY	37	10	70451038	70451038	Missense_Mutation	SNP	G	T	NA	ENST00000373644.4	p.D1960Y		NA		NA	25:140	NA	0.0	0
TET1	80312	HEC59_ENDOMETRIUM	37	10	70446426	70446427	Frame_Shift_Ins	INS	-	A	NA	ENST00000373644.4	p.T1790fs	20:90	NA	7:31	NA	16:55	NA	0.0	0
TET1	80312	HT_HAEMATOPOIETIC_AND_LYMPHOID_TISSUE	37	10	70405700	70405701	Frame_Shift_Ins	INS	-	A	NA	ENST00000373644.4	p.Q1072fs	76:358	NA				NA	0.0	0
TET1	80312	JHOS4_OVARY	37	10	70404997	70404999	In_Frame_Del	DEL	TTC	-	NA	ENST00000373644.4	p.S839del	24:156	NA		23:90	34:115	NA	0.0	0
TET1	80312	RKO_LARGE_INTESTINE	37	10	70441157	70441157	Splice_Site	DEL	A	-	NA	ENST00000373644.4	p.E1609fs	NA	14:14		15:18	328:395	NA	1.647e-05	0
TET1	80312	SKUT1_SOFT_TISSUE	37	10	70332153	70332153	Frame_Shift_Del	DEL	A	-	NA	ENST00000373644.4	p.K23fs	NA	26:21		30:39	17:20	NA	0.0	0
TET1	80312	CAL148_BREAST	37	10	70333991	70333993	In_Frame_Del	DEL	TGT	-	NA	ENST00000373644.4	p.V635del	NA	NA		14:40	41:110	NA	0.0	0
TET1	80312	EN_ENDOMETRIUM	37	10	70332161	70332162	Frame_Shift_Ins	INS	-	A	NA	ENST00000373644.4	p.K23fs	NA	NA	6:3	14:27	10:11	NA	0.0	0
TET1	80312	MN60_HAEMATOPOIETIC_AND_LYMPHOID_TISSUE	37	10	70332153	70332153	Frame_Shift_Del	DEL	A	-	NA	ENST00000373644.4	p.K23fs	NA	NA	NA	21:43	NA	NA	0.0	0
TET1	80312	NCCIT_TESTIS	37	10	70405002	70405003	Frame_Shift_Del	DEL	CA	-	NA	ENST00000373644.4	p.S839fs	NA	NA	NA	31:83	NA	NA	0.0	0
TET1	80312	LU65_LUNG	37	10	70451160	70451161	Frame_Shift_Ins	INS	-	T	NA	ENST00000373644.4	p.F2001fs	NA	NA		23:139	64:486	NA	0.0	0
TET1	80312	KYO1_HAEMATOPOIETIC_AND_LYMPHOID_TISSUE	37	10	70332152	70332153	Frame_Shift_Ins	INS	-	A	NA	ENST00000373644.4	p.K20fs		NA	6:17	NA		NA	0.0	0
TET1	80312	LOUCY_HAEMATOPOIETIC_AND_LYMPHOID_TISSUE	37	10	70405651	70405652	Frame_Shift_Ins	INS	-	A	NA	ENST00000373644.4	p.K1056fs	NA	NA	11:28			NA	0.0	0
TET1	80312	OCIMY5_HAEMATOPOIETIC_AND_LYMPHOID_TISSUE	37	10	70405651	70405652	Frame_Shift_Ins	INS	-	A	NA	ENST00000373644.4	p.K1056fs	NA	NA	10:59	NA	NA	NA	0.0	0
TET1	80312	OCIMY7_HAEMATOPOIETIC_AND_LYMPHOID_TISSUE	37	10	70405651	70405652	Frame_Shift_Ins	INS	-	A	NA	ENST00000373644.4	p.K1056fs	NA	NA	4:5	NA	NA	NA	0.0	0
TET1	80312	SIMA_AUTONOMIC_GANGLIA	37	10	70405651	70405652	Frame_Shift_Ins	INS	-	A	NA	ENST00000373644.4	p.K1056fs		NA	7:29		NA	NA	0.0	0
TET1	80312	SKNBE2_AUTONOMIC_GANGLIA	37	10	70405651	70405652	Frame_Shift_Ins	INS	-	A	NA	ENST00000373644.4	p.K1056fs	NA	NA	10:48	NA		NA	0.0	0

## Sheet: TET mutation
Hugo Symbol	Entrez Gene Id	Tumor Sample Barcode	Ncbi Build	Chr	Start Position	End Position	Variant Classification	Variant Type	Reference Allele	Tumor Seq Allele	dbSNP ID	Annotation Transcript	Protein Change	CCLE WES alt:ref	CCLE WGS alt:ref	CCLE RNAseq alt:ref	Sanger WES alt:ref	CCLE HC1650 alt:ref	CCLE Raindance alt:ref	ExAC Allelic Fraction	TCGA Hotspot Count
TET2	54790	NCIH661_LUNG	37	4	106155466	106155466	Missense_Mutation	SNP	C	T	NA	ENST00000540549.1	p.R123C	NA	22:0	8:0	54:0	43:0	781:7	4.119e-05	3
TET2	54790	HCC2998_LARGE_INTESTINE	37	4	106196499	106196499	Missense_Mutation	SNP	C	A	NA	ENST00000540549.1	p.S1611Y	NA	NA	NA	109:134	NA	NA	0.0	3
TET2	54790	SNU81_LARGE_INTESTINE	37	4	106196499	106196499	Missense_Mutation	SNP	C	A	NA	ENST00000540549.1	p.S1611Y	NA	NA	2:3	136:121	NA	NA	0.0	3
TET2	54790	22RV1_PROSTATE	37	4	106157650	106157650	Missense_Mutation	SNP	C	T	NA	ENST00000540549.1	p.P851S	33:26	16:25		29:32	64:51	187:145	6.589e-05	0
TET2	54790	AMO1_HAEMATOPOIETIC_AND_LYMPHOID_TISSUE	37	4	106157485	106157485	Missense_Mutation	SNP	G	A	NA	ENST00000540549.1	p.E796K	28:30	NA	19:9	21:31	36:45	NA	8.238e-06	0
TET2	54790	CI1_HAEMATOPOIETIC_AND_LYMPHOID_TISSUE	37	4	106158503	106158503	Missense_Mutation	SNP	G	A	NA	ENST00000540549.1	p.C1135Y	56:41	NA		NA	48:56		8.237e-06	0
TET2	54790	EJM_HAEMATOPOIETIC_AND_LYMPHOID_TISSUE	37	4	106157521	106157521	Missense_Mutation	SNP	G	A	NA	ENST00000540549.1	p.E808K	16:16	NA	7:7	23:27	8:13	171:157	0.0	0
TET2	54790	HEC108_ENDOMETRIUM	37	4	106155431	106155431	Missense_Mutation	SNP	A	G	NA	ENST00000540549.1	p.K111R	15:26	NA		NA	41:73	305:596	0.0	0
TET2	54790	HEC50B_ENDOMETRIUM	37	4	106156271	106156271	Missense_Mutation	SNP	C	T	NA	ENST00000540549.1	p.S391F	45:51	NA		NA	67:60	NA	8.236e-06	0
TET2	54790	HEC59_ENDOMETRIUM	37	4	106155957	106155957	Silent	SNP	A	C	NA	ENST00000540549.1	p.P286P	11:17	NA	5:17	NA	65:154	82:212	4.943e-05	0
TET2	54790	HS274T_BREAST	37	4	106156973	106156973	Missense_Mutation	SNP	C	T	NA	ENST00000540549.1	p.T625I	24:18	NA	4:2	NA	37:48		1.647e-05	0
TET2	54790	HS695T_SKIN	37	4	106157718	106157718	Silent	SNP	C	T	NA	ENST00000540549.1	p.I873I	22:26	NA	9:14	NA	8:6	NA	0.0	0
TET2	54790	HS936T_SKIN	37	4	106155146	106155146	Missense_Mutation	SNP	C	T	NA	ENST00000540549.1	p.P16L	7:20	NA	17:6	NA	17:16	174:113	0.0	0
TET2	54790	HT_HAEMATOPOIETIC_AND_LYMPHOID_TISSUE	37	4	106157072	106157072	Missense_Mutation	SNP	A	C	NA	ENST00000540549.1	p.H658P	37:28	NA		16:13	32:47	355:465	0.0	0
TET2	54790	JURKAT_HAEMATOPOIETIC_AND_LYMPHOID_TISSUE	37	4	106157592	106157592	Missense_Mutation	SNP	G	T	NA	ENST00000540549.1	p.Q831H	5:38	NA	15:20	11:39	6:33	NA	0.0	0
TET2	54790	KASUMI2_HAEMATOPOIETIC_AND_LYMPHOID_TISSUE	37	4	106156139	106156139	Missense_Mutation	SNP	C	T	NA	ENST00000540549.1	p.A347V	24:22	NA		NA	53:56		2.471e-05	0
TET2	54790	NCIH2172_LUNG	37	4	106156546	106156546	Missense_Mutation	SNP	A	G	NA	ENST00000540549.1	p.N483D	22:60	NA	3:16	17:47	33:106	102:460	0.0	0
TET2	54790	OCIAML5_HAEMATOPOIETIC_AND_LYMPHOID_TISSUE	37	4	106157573	106157573	Nonsense_Mutation	SNP	C	A	NA	ENST00000540549.1	p.S825*	25:26	NA	43:60	19:21	10:14	90:156	0.0	0
TET2	54790	OVSAHO_OVARY	37	4	106156468	106156468	Missense_Mutation	SNP	G	T	NA	ENST00000540549.1	p.A457S	33:22	15:11	3:4	NA	357:367	NA	0.0	0
TET2	54790	RPMI8402_HAEMATOPOIETIC_AND_LYMPHOID_TISSUE	37	4	106156811	106156811	Missense_Mutation	SNP	G	A	NA	ENST00000540549.1	p.R571H	21:98	NA		17:128	18:119		3.295e-05	0
TET2	54790	SNU175_LARGE_INTESTINE	37	4	106155903	106155903	Silent	SNP	G	A	NA	ENST00000540549.1	p.S268S	25:20	NA	34:34	15:16	129:136	314:395	1.647e-05	0
TET2	54790	SNU878_LIVER	37	4	106157892	106157892	Silent	SNP	T	C	NA	ENST00000540549.1	p.P931P	22:0	NA		NA	6:0	361:1	8.237e-06	0
TET2	54790	SNUC2A_LARGE_INTESTINE	37	4	106156196	106156196	Missense_Mutation	SNP	G	T	NA	ENST00000540549.1	p.S366I	38:47	20:28	32:35	NA	38:49		0.0	0
TET2	54790	TUHR14TKB_KIDNEY	37	4	106155957	106155957	Silent	SNP	A	C	NA	ENST00000540549.1	p.P286P	12:28	NA	5:25	NA	92:151	242:462	4.943e-05	0
TET2	54790	22RV1_PROSTATE	37	4	106193765	106193765	Silent	SNP	A	G	NA	ENST00000540549.1	p.K1409K		18:15	31:40	53:52	NA	NA	0.0	0
TET2	54790	5637_URINARY_TRACT	37	4	106196433	106196433	Missense_Mutation	SNP	A	G	NA	ENST00000540549.1	p.Y1589C	NA	28:17	17:19	147:95	NA	NA	0.0	0
TET2	54790	AGS_STOMACH	37	4	106180919	106180919	Missense_Mutation	SNP	C	T	NA	ENST00000540549.1	p.P1316L	NA	20:18	70:78	16:21	NA	NA	0.0	0
TET2	54790	DMS53_LUNG	37	4	106164890	106164890	Missense_Mutation	SNP	G	C	NA	ENST00000540549.1	p.R1253T	NA	15:13	6:28		NA	NA	0.0	0
TET2	54790	KYSE410_OESOPHAGUS	37	4	106156895	106156895	Missense_Mutation	SNP	A	G	NA	ENST00000540549.1	p.Q599R	NA	36:0	27:0	63:2	22:0	NA	3.295e-05	0
TET2	54790	NCIH2029_LUNG	37	4	106156824	106156824	Silent	SNP	G	A	NA	ENST00000540549.1	p.A575A	NA	22:26	10:19	63:68	96:63	192:288	1.647e-05	0
TET2	54790	NUGC3_STOMACH	37	4	106193749	106193749	Missense_Mutation	SNP	G	A	NA	ENST00000540549.1	p.R1404Q	NA	25:0	22:0	89:0	NA	NA	3.921e-05	0
TET2	54790	RKO_LARGE_INTESTINE	37	4	106157132	106157132	Missense_Mutation	SNP	G	A	NA	ENST00000540549.1	p.G678D	NA	14:25	3:14	18:48	162:354		0.0	0
TET2	54790	RKO_LARGE_INTESTINE	37	4	106197609	106197609	Missense_Mutation	SNP	A	G	NA	ENST00000540549.1	p.D1981G	NA	22:25	9:15	50:48	NA	NA	0.0	0
TET2	54790	U2OS_BONE	37	4	106156493	106156493	Missense_Mutation	SNP	C	T	NA	ENST00000540549.1	p.P465L	NA	13:14	9:26	24:63	231:587	31:80	0.0	0
TET2	54790	A2058_SKIN	37	4	106155514	106155514	Missense_Mutation	SNP	C	T	NA	ENST00000540549.1	p.P139S	NA	16:10	21:17	26:40	77:71		0.0	0
TET2	54790	A2058_SKIN	37	4	106155515	106155515	Missense_Mutation	SNP	C	T	NA	ENST00000540549.1	p.P139L	NA	17:10	21:18	26:41	76:71		0.0	0
TET2	54790	CCK81_LARGE_INTESTINE	37	4	106157182	106157182	Missense_Mutation	SNP	A	G	NA	ENST00000540549.1	p.M695V	NA	8:19		36:84	36:78		0.0	0
TET2	54790	CCK81_LARGE_INTESTINE	37	4	106197095	106197095	Missense_Mutation	SNP	G	A	NA	ENST00000540549.1	p.A1810T	NA	15:22	5:14	28:59	NA	NA	0.0	0
TET2	54790	COLO829_SKIN	37	4	106182983	106182983	Missense_Mutation	SNP	C	T	NA	ENST00000540549.1	p.A1341V	NA	16:18	15:15	26:37	NA	NA	0.0	0
TET2	54790	COV362_OVARY	37	4	106156520	106156520	Missense_Mutation	SNP	C	T	NA	ENST00000540549.1	p.P474L	NA	19:0	19:0	NA	85:1	NA	2.471e-05	0
TET2	54790	EBC1_LUNG	37	4	106155902	106155902	Nonsense_Mutation	SNP	C	A	NA	ENST00000540549.1	p.S268*	NA	19:0	14:0	16:0	128:0	374:6	0.0	0
TET2	54790	GP2D_LARGE_INTESTINE	37	4	106180860	106180860	Silent	SNP	T	C	NA	ENST00000540549.1	p.N1296N	NA	19:21	31:27	NA	NA	NA	0.0	0
TET2	54790	HCC38_BREAST	37	4	106196816	106196816	Missense_Mutation	SNP	C	A	NA	ENST00000540549.1	p.H1717N	NA	20:13		48:93	NA	NA	0.0	0
TET2	54790	HEC1A_ENDOMETRIUM	37	4	106193946	106193946	Missense_Mutation	SNP	G	A	NA	ENST00000540549.1	p.E1470K	NA	5:37		NA	NA	NA	0.0	0
TET2	54790	HT115_LARGE_INTESTINE	37	4	106197508	106197508	Missense_Mutation	SNP	A	C	NA	ENST00000540549.1	p.K1947N	NA	10:0	34:1	96:3	NA	NA	0.0	0
TET2	54790	JHH1_LIVER	37	4	106156895	106156895	Missense_Mutation	SNP	A	G	NA	ENST00000540549.1	p.Q599R	NA	9:6	12:1	43:26	31:16	170:166	3.295e-05	0
TET2	54790	KYM1_SOFT_TISSUE	37	4	106156255	106156255	Missense_Mutation	SNP	G	T	NA	ENST00000540549.1	p.V386L	NA	19:14	25:15	39:44	79:92		0.0	0
TET2	54790	MDAMB453_BREAST	37	4	106157740	106157740	Missense_Mutation	SNP	A	G	NA	ENST00000540549.1	p.R881G	NA	6:31	6:15	10:38	18:65		0.0	0
TET2	54790	MFE319_ENDOMETRIUM	37	4	106197101	106197101	Missense_Mutation	SNP	G	C	NA	ENST00000540549.1	p.V1812L	NA	21:19	16:17	71:76	NA	NA	0.0	0
TET2	54790	NCIH2030_LUNG	37	4	106197606	106197606	Missense_Mutation	SNP	C	T	NA	ENST00000540549.1	p.T1980I	NA	7:12	25:20	57:41	NA	NA	3.887e-05	0
TET2	54790	QGP1_PANCREAS	37	4	106157435	106157435	Missense_Mutation	SNP	C	G	NA	ENST00000540549.1	p.T779S	NA	12:39	11:27	18:55	9:47		0.0	0
TET2	54790	SKMEL5_SKIN	37	4	106156529	106156529	Missense_Mutation	SNP	C	T	NA	ENST00000540549.1	p.S477F	NA	8:11		54:26	349:240		0.0	0
TET2	54790	SW48_LARGE_INTESTINE	37	4	106182946	106182946	Missense_Mutation	SNP	C	A	NA	ENST00000540549.1	p.L1329M	NA	8:14		36:49	NA	NA	0.0	0
TET2	54790	VMCUB1_URINARY_TRACT	37	4	106157196	106157196	Missense_Mutation	SNP	G	T	NA	ENST00000540549.1	p.L699F	NA	8:15		26:60	69:109	NA	0.0	0
TET2	54790	A431_SKIN	37	4	106156635	106156635	Silent	SNP	C	G	NA	ENST00000540549.1	p.L512L	NA	NA	NA	60:30	NA	NA	0.0	0
TET2	54790	AMO1_HAEMATOPOIETIC_AND_LYMPHOID_TISSUE	37	4	106196762	106196762	Nonsense_Mutation	SNP	C	T	NA	ENST00000540549.1	p.Q1699*		NA		105:76	NA	NA	0.0	0
TET2	54790	ATN1_HAEMATOPOIETIC_AND_LYMPHOID_TISSUE	37	4	106197208	106197208	Nonsense_Mutation	SNP	G	A	NA	ENST00000540549.1	p.W1847*	NA	NA	NA	15:42	NA	NA	0.0	0
TET2	54790	AU565_BREAST	37	4	106156143	106156143	Silent	SNP	T	C	NA	ENST00000540549.1	p.S348S	NA			9:67	14:72	NA	1.647e-05	0
TET2	54790	BEN_LUNG	37	4	106196718	106196718	Missense_Mutation	SNP	G	C	NA	ENST00000540549.1	p.G1684A	NA	NA	6:9	48:103	NA	NA	0.0	0
TET2	54790	CHL1_SKIN	37	4	106156887	106156887	Silent	SNP	C	T	NA	ENST00000540549.1	p.L596L	NA	NA	NA	48:21	51:20	NA	0.0	0
TET2	54790	CPCN_LUNG	37	4	106158486	106158486	Silent	SNP	T	C	NA	ENST00000540549.1	p.D1129D	NA	NA	NA	76:71	67:69	NA	4.118e-05	0
TET2	54790	CROAP3	37	4	106164897	106164897	Nonsense_Mutation	SNP	C	A	NA	ENST00000540549.1	p.Y1255*	NA	NA	NA	24:27	NA	NA	0.0	0
TET2	54790	CTV1_HAEMATOPOIETIC_AND_LYMPHOID_TISSUE	37	4	106157742	106157742	Silent	SNP	G	A	NA	ENST00000540549.1	p.R881R	NA	NA	NA	23:23	NA	NA	0.0	0
TET2	54790	DEL_HAEMATOPOIETIC_AND_LYMPHOID_TISSUE	37	4	106197181	106197181	Silent	SNP	T	C	NA	ENST00000540549.1	p.S1838S	NA	NA		11:70	NA	NA	0.0	0
TET2	54790	ECC12_STOMACH	37	4	106197560	106197560	Silent	SNP	C	T	NA	ENST00000540549.1	p.L1965L	NA	NA	177:2	111:3	NA	NA	0.0	0
TET2	54790	EKVX_LUNG	37	4	106155518	106155518	Missense_Mutation	SNP	A	G	NA	ENST00000540549.1	p.N140S	NA	NA		23:34	NA	NA	0.0	0
TET2	54790	EN_ENDOMETRIUM	37	4	106155274	106155274	Missense_Mutation	SNP	A	G	NA	ENST00000540549.1	p.S59G	NA	NA	15:18	28:22	69:58	373:240	0.0	0
TET2	54790	ESO51_OESOPHAGUS	37	4	106194055	106194055	Missense_Mutation	SNP	G	C	NA	ENST00000540549.1	p.S1506T	NA	NA	NA	21:79	NA	NA	0.0	0
TET2	54790	EVSAT_BREAST	37	4	106193865	106193865	Missense_Mutation	SNP	G	T	NA	ENST00000540549.1	p.A1443S	NA	NA	NA	14:44	NA	NA	0.0	0
TET2	54790	EW24_BONE	37	4	106156173	106156173	Silent	SNP	C	T	NA	ENST00000540549.1	p.S358S	NA	NA	NA	32:38	NA	NA	2.471e-05	0
TET2	54790	GP5D_LARGE_INTESTINE	37	4	106180859	106180859	Missense_Mutation	SNP	A	G	NA	ENST00000540549.1	p.N1296S	NA	NA	NA	57:71	NA	NA	0.0	0
TET2	54790	GP5D_LARGE_INTESTINE	37	4	106180860	106180860	Silent	SNP	T	C	NA	ENST00000540549.1	p.N1296N	NA	NA	NA	59:67	NA	NA	0.0	0
TET2	54790	HLE_LIVER	37	4	106197477	106197477	Missense_Mutation	SNP	C	G	NA	ENST00000540549.1	p.P1937R	NA	NA	NA	15:63	NA	NA	0.0	0
TET2	54790	HMVII_SKIN	37	4	106158448	106158448	Missense_Mutation	SNP	A	G	NA	ENST00000540549.1	p.K1117E	NA	NA	NA	24:98	NA	NA	0.0	0
TET2	54790	HPAFII_PANCREAS	37	4	106164819	106164819	Silent	SNP	C	T	NA	ENST00000540549.1	p.L1229L	NA	NA	4:10	12:4	NA	NA	0.0	0
TET2	54790	HSC2_UPPER_AERODIGESTIVE_TRACT	37	4	106157539	106157539	Missense_Mutation	SNP	C	T	NA	ENST00000540549.1	p.R814C	NA	NA	8:12	20:26	10:17	258:384	0.0	0
TET2	54790	JHH6_LIVER	37	4	106157066	106157066	Missense_Mutation	SNP	C	G	NA	ENST00000540549.1	p.P656R	NA	NA	8:3	25:14	30:35	152:225	0.0	0
TET2	54790	KG1_HAEMATOPOIETIC_AND_LYMPHOID_TISSUE	37	4	106197469	106197469	Silent	SNP	G	A	NA	ENST00000540549.1	p.K1934K	NA	NA	40:39	12:68	NA	NA	0.0	0
TET2	54790	LC2AD_LUNG	37	4	106196487	106196487	Missense_Mutation	SNP	C	T	NA	ENST00000540549.1	p.S1607L	NA	NA	NA	49:188	NA	NA	0.0	0
TET2	54790	LNCAPCLONEFGC_PROSTATE	37	4	106157482	106157482	Missense_Mutation	SNP	A	G	NA	ENST00000540549.1	p.S795G		NA		7:37			0.0	0
TET2	54790	MCCAR_HAEMATOPOIETIC_AND_LYMPHOID_TISSUE	37	4	106164897	106164897	Nonsense_Mutation	SNP	C	A	NA	ENST00000540549.1	p.Y1255*	NA	NA	NA	31:22	NA	NA	0.0	0
TET2	54790	MELJUSO_SKIN	37	4	106164913	106164913	Missense_Mutation	SNP	C	T	NA	ENST00000540549.1	p.R1261C	NA	NA	11:13	9:14	NA	NA	0.0	0
TET2	54790	NALM6_HAEMATOPOIETIC_AND_LYMPHOID_TISSUE	37	4	106164914	106164914	Missense_Mutation	SNP	G	A	NA	ENST00000540549.1	p.R1261H	NA	NA		16:22	NA	NA	8.035e-05	0
TET2	54790	NCIH1573_LUNG	37	4	106156019	106156019	Missense_Mutation	SNP	T	G	NA	ENST00000540549.1	p.L307R	NA	NA	27:38	34:28	116:112		3.295e-05	0
TET2	54790	NCIH2135_LUNG	37	4	106155786	106155786	Silent	SNP	A	G	NA	ENST00000540549.1	p.T229T	NA	NA	NA	44:6	NA	NA	0.0	0
TET2	54790	NCIH2347_LUNG	37	4	106156512	106156512	Silent	SNP	C	T	NA	ENST00000540549.1	p.S471S	NA	NA	9:23	46:58	92:118	106:123	2.471e-05	0
TET2	54790	NCIH2591_PLEURA	37	4	106156841	106156841	Missense_Mutation	SNP	G	A	NA	ENST00000540549.1	p.R581H	NA	NA	NA	84:66	NA	NA	8.236e-06	0
TET2	54790	NCIH630_LARGE_INTESTINE	37	4	106197152	106197152	Missense_Mutation	SNP	C	T	NA	ENST00000540549.1	p.P1829S	NA	NA	NA	27:21	NA	NA	0.0	0
TET2	54790	OVK18_OVARY	37	4	106197381	106197381	Missense_Mutation	SNP	A	C	NA	ENST00000540549.1	p.K1905T	NA			8:52	NA	NA	0.0	0
TET2	54790	OVKATE_OVARY	37	4	106196927	106196927	Missense_Mutation	SNP	G	A	NA	ENST00000540549.1	p.G1754S	NA	NA	42:49	68:68	NA	NA	0.0	0
TET2	54790	SARC9371_BONE	37	4	106182956	106182956	Missense_Mutation	SNP	T	A	NA	ENST00000540549.1	p.L1332H	NA	NA	NA	59:0	NA	NA	0.0	0
TET2	54790	SNU1040_LARGE_INTESTINE	37	4	106155386	106155386	Missense_Mutation	SNP	G	A	NA	ENST00000540549.1	p.R96H	NA	NA	19:21	53:55	66:60	214:813	0.0	0
TET2	54790	SNU1040_LARGE_INTESTINE	37	4	106157406	106157406	Silent	SNP	G	A	NA	ENST00000540549.1	p.Q769Q	NA	NA		18:67			0.0	0
TET2	54790	SNU81_LARGE_INTESTINE	37	4	106155928	106155928	Missense_Mutation	SNP	G	A	NA	ENST00000540549.1	p.A277T	NA	NA		24:23	104:122	NA	2.471e-05	0
TET2	54790	SUDHL5_HAEMATOPOIETIC_AND_LYMPHOID_TISSUE	37	4	106180801	106180801	Missense_Mutation	SNP	G	T	NA	ENST00000540549.1	p.D1277Y		NA		45:58	NA	NA	0.0	0
TET2	54790	SUDHL8_HAEMATOPOIETIC_AND_LYMPHOID_TISSUE	37	4	106196474	106196474	Nonsense_Mutation	SNP	C	T	NA	ENST00000540549.1	p.Q1603*		NA	59:0	172:1	NA	NA	0.0	0
TET2	54790	SW684_SOFT_TISSUE	37	4	106155502	106155502	Missense_Mutation	SNP	G	A	NA	ENST00000540549.1	p.E135K	NA	NA	NA	30:23	NA	NA	0.0	0
TET2	54790	SW684_SOFT_TISSUE	37	4	106156323	106156323	Silent	SNP	C	T	NA	ENST00000540549.1	p.P408P	NA	NA	NA	64:47	NA	NA	0.0	0
TET2	54790	SW684_SOFT_TISSUE	37	4	106156535	106156535	Missense_Mutation	SNP	G	A	NA	ENST00000540549.1	p.R479K	NA	NA	NA	53:42	NA	NA	0.0	0
TET2	54790	SW684_SOFT_TISSUE	37	4	106193858	106193858	Silent	SNP	G	A	NA	ENST00000540549.1	p.R1440R	NA	NA	NA	42:38	NA	NA	0.0	0
TET2	54790	TCCSUP_URINARY_TRACT	37	4	106157180	106157180	Missense_Mutation	SNP	T	G	NA	ENST00000540549.1	p.L694R	NA	NA	17:16	22:35	NA	NA	0.0	0
TET2	54790	UDSCC2_UPPER_AERODIGESTIVE_TRACT	37	4	106196849	106196849	Nonsense_Mutation	SNP	G	T	NA	ENST00000540549.1	p.E1728*	NA	NA	NA	30:65	NA	NA	0.0	0
TET2	54790	WSUNHL_HAEMATOPOIETIC_AND_LYMPHOID_TISSUE	37	4	106155255	106155255	Silent	SNP	C	T	NA	ENST00000540549.1	p.T52T	NA	NA	NA	23:34	NA	NA	0.0	0
TET2	54790	COLO829_MATCHED_NORMAL_TISSUE	37	4	106182983	106182983	Missense_Mutation	SNP	C	T	NA	ENST00000540549.1	p.A1341V	NA	NA	NA	50:47	NA	NA	0.0	0
TET2	54790	HCC1954_MATCHED_NORMAL_TISSUE	37	4	106156480	106156480	Nonsense_Mutation	SNP	C	T	NA	ENST00000540549.1	p.Q461*	NA	NA	NA	66:59	NA	NA	0.0	0
TET2	54790	M00921	37	4	106193981	106193981	Silent	SNP	C	T	NA	ENST00000540549.1	p.S1481S	NA	NA	NA	47:2	NA	NA	0.0	0
TET2	54790	MET2B	37	4	106197193	106197193	Missense_Mutation	SNP	C	A	NA	ENST00000540549.1	p.D1842E	NA	NA	NA	26:32	NA	NA	0.0	0
TET2	54790	NCIBL209_MATCHED_NORMAL_TISSUE	37	4	106156019	106156019	Missense_Mutation	SNP	T	G	NA	ENST00000540549.1	p.L307R	NA	NA	NA	20:34	NA	NA	3.295e-05	0
TET2	54790	SNU81_LARGE_INTESTINE	37	4	106196297	106196297	Missense_Mutation	SNP	C	A	NA	ENST00000540549.1	p.P1544T	NA	NA	14:50	72:59	NA	NA	0.0	0
TET2	54790	TASK1_CENTRAL_NERVOUS_SYSTEM	37	4	106157539	106157539	Missense_Mutation	SNP	C	T	NA	ENST00000540549.1	p.R814C	NA	NA	NA	59:0	NA	NA	0.0	0
TET2	54790	CI1_HAEMATOPOIETIC_AND_LYMPHOID_TISSUE	37	4	106196404	106196404	Nonsense_Mutation	SNP	T	A	NA	ENST00000540549.1	p.Y1579*		NA	40:39	NA	NA	NA	0.0	0
TET2	54790	CI1_HAEMATOPOIETIC_AND_LYMPHOID_TISSUE	37	4	106196432	106196432	Missense_Mutation	SNP	T	A	NA	ENST00000540549.1	p.Y1589N		NA	35:30	NA	NA	NA	0.0	0
TET2	54790	CJM_SKIN	37	4	106193809	106193809	Missense_Mutation	SNP	C	G	NA	ENST00000540549.1	p.S1424C	NA	NA	16:45	NA	NA	NA	0.0	0
TET2	54790	HEC251_ENDOMETRIUM	37	4	106196575	106196575	Missense_Mutation	SNP	C	A	NA	ENST00000540549.1	p.N1636K		NA	6:16	NA	NA	NA	0.0	0
TET2	54790	HMCB_SKIN	37	4	106156887	106156887	Silent	SNP	C	T	NA	ENST00000540549.1	p.L596L	NA	NA	8:28	NA	NA	NA	0.0	0
TET2	54790	HS936T_SKIN	37	4	106194012	106194012	Missense_Mutation	SNP	G	A	NA	ENST00000540549.1	p.E1492K		NA	14:14	NA	NA	NA	0.0	0
TET2	54790	HUNS1_HAEMATOPOIETIC_AND_LYMPHOID_TISSUE	37	4	106197616	106197616	Silent	SNP	A	G	NA	ENST00000540549.1	p.T1983T	NA	NA	51:61	NA	NA	NA	0.0	0
TET2	54790	IOMMLEE_CENTRAL_NERVOUS_SYSTEM	37	4	106156337	106156337	Missense_Mutation	SNP	C	A	NA	ENST00000540549.1	p.P413Q	NA	NA	5:11	NA	NA	NA	0.0	0
TET2	54790	KMM1_HAEMATOPOIETIC_AND_LYMPHOID_TISSUE	37	4	106190882	106190882	Missense_Mutation	SNP	A	G	NA	ENST00000540549.1	p.N1387S		NA	20:23	NA	NA	NA	0.0	0
TET2	54790	KPNSI9S_AUTONOMIC_GANGLIA	37	4	106196956	106196956	Missense_Mutation	SNP	C	G	NA	ENST00000540549.1	p.I1763M		NA	17:20	NA	NA	NA	0.0	0
TET2	54790	OCIAML5_HAEMATOPOIETIC_AND_LYMPHOID_TISSUE	37	4	106162529	106162529	Missense_Mutation	SNP	A	G	NA	ENST00000540549.1	p.Y1148C		NA	31:39		NA	NA	0.0	0
TET2	54790	SKNDZ_AUTONOMIC_GANGLIA	37	4	106155467	106155467	Missense_Mutation	SNP	G	A	NA	ENST00000540549.1	p.R123H	NA	NA	18:40		3:11	NA	2.471e-05	0
TET2	54790	SNUC4_LARGE_INTESTINE	37	4	106164773	106164773	Missense_Mutation	SNP	G	A	NA	ENST00000540549.1	p.R1214Q		NA	18:49	NA	NA	NA	3.918e-05	0
TET2	54790	TE9_OESOPHAGUS	37	4	106157212	106157212	Missense_Mutation	SNP	C	G	NA	ENST00000540549.1	p.Q705E	NA	NA	13:97				0.0	0
TET2	54790	TOLEDO_HAEMATOPOIETIC_AND_LYMPHOID_TISSUE	37	4	106197518	106197518	Missense_Mutation	SNP	C	T	NA	ENST00000540549.1	p.R1951W		NA	58:32	NA	NA	NA	0.0	0
TET2	54790	NCIH209_LUNG	37	4	106156019	106156019	Missense_Mutation	SNP	T	G	NA	ENST00000540549.1	p.L307R	NA				37:121	NA	3.295e-05	0
TET2	54790	SW1088_CENTRAL_NERVOUS_SYSTEM	37	4	106157219	106157219	Missense_Mutation	SNP	C	A	NA	ENST00000540549.1	p.A707D	NA	NA			19:121		0.0	0
TET2	54790	SIGM5_HAEMATOPOIETIC_AND_LYMPHOID_TISSUE	37	4	106158218	106158219	Frame_Shift_Ins	INS	-	A	NA	ENST00000540549.1	p.F1041fs	29:63	NA	11:34	23:54	20:55	NA	0.0	0
TET2	54790	DU145_PROSTATE	37	4	106155778	106155779	Frame_Shift_Ins	INS	-	A	NA	ENST00000513237.1	p.E248fs	NA	15:21	4:5	11:23	165:240	347:544	1.647e-05	0
TET2	54790	GP2D_LARGE_INTESTINE	37	4	106197506	106197506	Frame_Shift_Del	DEL	A	-	NA	ENST00000513237.1	p.K1969fs	NA	6:26	16:64	NA	NA	NA	0.0	0
TET2	54790	LS411N_LARGE_INTESTINE	37	4	106155778	106155779	Frame_Shift_Ins	INS	-	A	NA	ENST00000540549.1	p.E227fs	NA	17:14	7:6	31:24	160:133	741:385	1.647e-05	0
TET2	54790	CROAP3	37	4	106156786	106156789	Frame_Shift_Del	DEL	GGAT	-	NA	ENST00000540549.1	p.GW563fs	NA	NA	NA	20:2	NA	NA	0.0	0
TET2	54790	CTB1_HAEMATOPOIETIC_AND_LYMPHOID_TISSUE	37	4	106156485	106156485	Frame_Shift_Del	DEL	T	-	NA	ENST00000540549.1	p.S462fs	NA	NA	NA	42:63	NA	NA	0.0	0
TET2	54790	GOTO_AUTONOMIC_GANGLIA	37	4	106157097	106157097	Frame_Shift_Del	DEL	C	-	NA	ENST00000540549.1	p.D666fs	NA	NA	NA	7:35	NA	NA	0.0	0
TET2	54790	HC1_HAEMATOPOIETIC_AND_LYMPHOID_TISSUE	37	4	106156879	106156879	Frame_Shift_Del	DEL	C	-	NA	ENST00000540549.1	p.P594fs	NA	NA	NA	46:70	NA	NA	0.0	0
TET2	54790	KO52_HAEMATOPOIETIC_AND_LYMPHOID_TISSUE	37	4	106196345	106196346	Frame_Shift_Ins	INS	-	A	NA	ENST00000540549.1	p.Y1560fs	NA	NA	106:1	91:23	NA	NA	0.0	0
TET2	54790	MHHPREB1_HAEMATOPOIETIC_AND_LYMPHOID_TISSUE	37	4	106197506	106197506	Frame_Shift_Del	DEL	A	-	NA	ENST00000540549.1	p.K1948fs	NA	NA	NA	49:62	NA	NA	0.0	0
TET2	54790	SIGM5_HAEMATOPOIETIC_AND_LYMPHOID_TISSUE	37	4	106164033	106164033	Frame_Shift_Del	DEL	C	-	NA	ENST00000540549.1	p.I1181fs		NA	29:10	38:37	NA	NA	0.0	0
TET2	54790	TGBC11TKB_STOMACH	37	4	106156321	106156321	Frame_Shift_Del	DEL	C	-	NA	ENST00000540549.1	p.P411fs	NA	NA	4:3	44:77	66:93	NA	0.0	0
TET2	54790	MZ1B_MATCHED_NORMAL_TISSUE	37	4	106156042	106156043	Frame_Shift_Ins	INS	-	A	NA	ENST00000540549.1	p.S315fs	NA	NA	NA	12:27	NA	NA	0.0	0
TET2	54790	NCIBL1437_MATCHED_NORMAL_TISSUE	37	4	106164791	106164791	Frame_Shift_Del	DEL	C	-	NA	ENST00000540549.1	p.T1220fs	NA	NA	NA	13:9	NA	NA	0.0	0
TET2	54790	NCIBL1437_MATCHED_NORMAL_TISSUE	37	4	106197175	106197175	Frame_Shift_Del	DEL	G	-	NA	ENST00000540549.1	p.V1836fs	NA	NA	NA	33:39	NA	NA	0.0	0
TET2	54790	NCIH1694_LUNG	37	4	106156276	106156277	Frame_Shift_Ins	INS	-	C	NA	ENST00000540549.1	p.S393fs	NA			10:79	NA	NA	0.0	0
TET2	54790	SKM1_HAEMATOPOIETIC_AND_LYMPHOID_TISSUE	37	4	106193790	106193791	Frame_Shift_Ins	INS	-	TT	NA	ENST00000540549.1	p.L1418fs	NA	NA	11:27	67:89	NA	NA	0.0	0
TET2	54790	CORL47_LUNG	37	4	106197505	106197506	Frame_Shift_Ins	INS	-	A	NA	ENST00000540549.1	p.K1947fs	NA	NA	6:27	NA	NA	NA	0.0	0
TET2	54790	HUT102_HAEMATOPOIETIC_AND_LYMPHOID_TISSUE	37	4	106158300	106158303	Frame_Shift_Del	DEL	ACAA	-	NA	ENST00000540549.1	p.RQ1067fs	NA	NA	34:42	NA	25:52	NA	0.0	0
TET2	54790	MESSA_SOFT_TISSUE	37	4	106197505	106197506	Frame_Shift_Ins	INS	-	A	NA	ENST00000540549.1	p.K1947fs	NA	NA	8:40		NA	NA	0.0	0
TET2	54790	PC9_LUNG	37	4	106196630	106196631	Frame_Shift_Ins	INS	-	A	NA	ENST00000540549.1	p.P1655fs	NA	NA	4:7	NA	NA	NA	0.0	0

## Sheet: TET3 mutation
Hugo Symbol	Entrez Gene Id	Tumor Sample Barcode	Ncbi Build	Chr	Start Position	End Position	Variant Classification	Variant Type	Reference Allele	Tumor Seq Allele	dbSNP ID	Annotation Transcript	Protein Change	CCLE WES alt:ref	CCLE WGS alt:ref	CCLE RNAseq alt:ref	Sanger WES alt:ref	CCLE HC1650 alt:ref	CCLE Raindance alt:ref	ExAC Allelic Fraction	TCGA Hotspot Count
TET3	200424	BICR18_UPPER_AERODIGESTIVE_TRACT	37	2	74317033	74317033	Silent	SNP	C	T	NA	ENST00000409262.3	p.C831C		NA	7:63	NA	NA	NA	0.0	3
TET3	200424	22RV1_PROSTATE	37	2	74317140	74317140	Missense_Mutation	SNP	G	A	NA	ENST00000409262.3	p.R867H	64:60	19:12	47:49	64:84	NA	NA	0.0	0
TET3	200424	CI1_HAEMATOPOIETIC_AND_LYMPHOID_TISSUE	37	2	74307623	74307623	Splice_Site	SNP	A	G	NA	ENST00000409262.3		8:8	NA		NA	NA	NA	0.0	0
TET3	200424	CI1_HAEMATOPOIETIC_AND_LYMPHOID_TISSUE	37	2	74327582	74327582	Nonsense_Mutation	SNP	C	T	NA	ENST00000409262.3	p.Q1088*	7:4	NA	40:49	NA	NA	NA	0.0	0
TET3	200424	CL14_LARGE_INTESTINE	37	2	74274318	74274318	Missense_Mutation	SNP	C	A	NA	ENST00000409262.3	p.P290H	29:78	NA	10:33	NA	NA	NA	0.0	0
TET3	200424	CMLT1_HAEMATOPOIETIC_AND_LYMPHOID_TISSUE	37	2	74320089	74320089	Nonsense_Mutation	SNP	C	T	NA	ENST00000409262.3	p.R899*	6:3	NA	24:59	10:10	NA	NA	0.0	0
TET3	200424	DMS79_LUNG	37	2	74274261	74274261	Missense_Mutation	SNP	G	T	NA	ENST00000409262.3	p.W271L	83:71	22:32	70:66	65:52	NA	NA	0.0	0
TET3	200424	HEC108_ENDOMETRIUM	37	2	74273587	74273587	Silent	SNP	C	T	NA	ENST00000409262.3	p.D46D	13:41	NA	11:43	NA	NA	NA	0.0	0
TET3	200424	HEC108_ENDOMETRIUM	37	2	74328748	74328748	Silent	SNP	G	A	NA	ENST00000409262.3	p.G1476G	3:24	NA		NA	NA	NA	0.0	0
TET3	200424	HEC151_ENDOMETRIUM	37	2	74275220	74275220	Missense_Mutation	SNP	G	A	NA	ENST00000409262.3	p.G591S	17:26	NA	24:39	NA	NA	NA	3.31e-05	0
TET3	200424	HEC151_ENDOMETRIUM	37	2	74329028	74329028	Missense_Mutation	SNP	G	A	NA	ENST00000409262.3	p.G1570R	17:23	NA	42:52	NA	NA	NA	0.0	0
TET3	200424	HPBALL_HAEMATOPOIETIC_AND_LYMPHOID_TISSUE	37	2	74275152	74275152	Missense_Mutation	SNP	C	T	NA	ENST00000409262.3	p.A568V	32:31	NA	40:41	NA	NA	NA	0.0	0
TET3	200424	HS695T_SKIN	37	2	74317077	74317077	Missense_Mutation	SNP	C	T	NA	ENST00000409262.3	p.S846F	112:60	NA	25:9	NA	NA	NA	0.0	0
TET3	200424	HS936T_SKIN	37	2	74273530	74273530	Silent	SNP	C	T	NA	ENST00000409262.3	p.P27P	15:42	NA	5:7	NA	NA	NA	1.658e-05	0
TET3	200424	HSC4_UPPER_AERODIGESTIVE_TRACT	37	2	74320046	74320046	Missense_Mutation	SNP	G	C	NA	ENST00000409262.3	p.K884N	3:12	NA	10:40	3:19	NA	NA	0.0	0
TET3	200424	HUH28_BILIARY_TRACT	37	2	74273642	74273642	Missense_Mutation	SNP	C	G	NA	ENST00000409262.3	p.L65V	4:23	NA		NA	NA	NA	0.0	0
TET3	200424	JURKAT_HAEMATOPOIETIC_AND_LYMPHOID_TISSUE	37	2	74274904	74274904	Silent	SNP	C	T	NA	ENST00000409262.3	p.L485L	12:12	NA	38:25	20:17	NA	NA	0.0	0
TET3	200424	JURKAT_HAEMATOPOIETIC_AND_LYMPHOID_TISSUE	37	2	74328389	74328389	Silent	SNP	C	T	NA	ENST00000409262.3	p.L1357L	14:7	NA		12:8	NA	NA	8.277e-06	0
TET3	200424	JURLMK1_HAEMATOPOIETIC_AND_LYMPHOID_TISSUE	37	2	74328129	74328129	Missense_Mutation	SNP	C	T	NA	ENST00000409262.3	p.T1270I	10:11	NA		26:20	NA	NA	8.262e-06	0
TET3	200424	KCL22_HAEMATOPOIETIC_AND_LYMPHOID_TISSUE	37	2	74273532	74273532	Missense_Mutation	SNP	C	T	NA	ENST00000409262.3	p.A28V	26:19	NA	22:10	35:43	NA	NA	0.0	0
TET3	200424	KCL22_HAEMATOPOIETIC_AND_LYMPHOID_TISSUE	37	2	74275438	74275438	Silent	SNP	C	T	NA	ENST00000409262.3	p.F663F	14:6	NA	18:24	39:18	NA	NA	0.0	0
TET3	200424	KCL22_HAEMATOPOIETIC_AND_LYMPHOID_TISSUE	37	2	74326622	74326622	Nonsense_Mutation	SNP	C	T	NA	ENST00000409262.3	p.Q1028*	10:11	NA	35:40	6:15	NA	NA	0.0	0
TET3	200424	M07E_HAEMATOPOIETIC_AND_LYMPHOID_TISSUE	37	2	74328181	74328181	Silent	SNP	G	C	NA	ENST00000409262.3	p.L1287L	15:9	NA		NA	NA	NA	8.269e-06	0
TET3	200424	SKMEL31_SKIN	37	2	74275304	74275304	Missense_Mutation	SNP	C	T	NA	ENST00000409262.3	p.P619S	4:15	NA	4:5	28:60	NA	NA	0.0	0
TET3	200424	SNGM_ENDOMETRIUM	37	2	74273538	74273538	Missense_Mutation	SNP	C	T	NA	ENST00000409262.3	p.P30L	32:42	21:17	19:20	36:47	NA	NA	0.0	0
TET3	200424	SNU349_KIDNEY	37	2	74328896	74328896	Missense_Mutation	SNP	G	A	NA	ENST00000409262.3	p.G1526S	15:75	NA	24:58	NA	NA	NA	0.0	0
TET3	200424	SNU61_LARGE_INTESTINE	37	2	74326565	74326565	Missense_Mutation	SNP	G	T	NA	ENST00000409262.3	p.A1009S	9:21	NA	36:74	9:22	NA	NA	0.0	0
TET3	200424	SNU761_LIVER	37	2	74328316	74328316	Silent	SNP	C	T	NA	ENST00000409262.3	p.I1332I	9:12	NA	17:26	NA	NA	NA	3.308e-05	0
TET3	200424	SNUC2A_LARGE_INTESTINE	37	2	74273666	74273666	Missense_Mutation	SNP	G	A	NA	ENST00000409262.3	p.E73K	16:18	16:24		NA	NA	NA	8.274e-06	0
TET3	200424	SNUC4_LARGE_INTESTINE	37	2	74327618	74327618	Missense_Mutation	SNP	G	A	NA	ENST00000409262.3	p.A1100T	6:5	NA	67:36	NA	NA	NA	2.478e-05	0
TET3	200424	SUPHD1_HAEMATOPOIETIC_AND_LYMPHOID_TISSUE	37	2	74328713	74328713	Missense_Mutation	SNP	G	A	NA	ENST00000409262.3	p.E1465K	10:8	NA	NA	6:14	NA	NA	0.0	0
TET3	200424	SW579_THYROID	37	2	74329021	74329021	Silent	SNP	C	G	NA	ENST00000409262.3	p.P1567P	23:21	20:21	28:52	NA	NA	NA	0.0	0
TET3	200424	T3M4_PANCREAS	37	2	74328124	74328124	Silent	SNP	G	C	NA	ENST00000409262.3	p.P1268P	4:7	NA	24:34	NA	NA	NA	1.652e-05	0
TET3	200424	TE14_OESOPHAGUS	37	2	74275537	74275537	Splice_Site	SNP	C	T	NA	ENST00000409262.3	p.V696V	24:18	NA		NA	NA	NA	0.0	0
TET3	200424	2313287_STOMACH	37	2	74327554	74327554	Silent	SNP	C	A	NA	ENST00000409262.3	p.G1078G	NA	33:27	NA	18:17	NA	NA	0.0	0
TET3	200424	5637_URINARY_TRACT	37	2	74320727	74320727	Silent	SNP	G	A	NA	ENST00000409262.3	p.T932T	NA	12:23	14:38	27:71	NA	NA	3.305e-05	0
TET3	200424	A375_SKIN	37	2	74328891	74328891	Missense_Mutation	SNP	C	T	NA	ENST00000409262.3	p.A1524V	NA	10:25	32:39		NA	NA	0.0	0
TET3	200424	DU145_PROSTATE	37	2	74275288	74275288	Silent	SNP	C	T	NA	ENST00000409262.3	p.P613P	NA	17:48		37:118	NA	NA	0.0	0
TET3	200424	EFO27_OVARY	37	2	74274248	74274248	Missense_Mutation	SNP	C	T	NA	ENST00000409262.3	p.R267W	NA	18:21	27:17	70:48	NA	NA	3.307e-05	0
TET3	200424	HCT116_LARGE_INTESTINE	37	2	74273584	74273584	Silent	SNP	C	T	NA	ENST00000409262.3	p.P45P	NA	26:34		14:8	NA	NA	8.275e-06	0
TET3	200424	NUGC3_STOMACH	37	2	74329076	74329076	Missense_Mutation	SNP	C	T	NA	ENST00000409262.3	p.R1586W	NA	14:27			NA	NA	8.282e-06	0
TET3	200424	RKO_LARGE_INTESTINE	37	2	74274487	74274487	Silent	SNP	T	C	NA	ENST00000409262.3	p.P346P	NA	20:26	8:9	12:17	NA	NA	0.0	0
TET3	200424	SNGM_ENDOMETRIUM	37	2	74274803	74274803	Missense_Mutation	SNP	G	A	NA	ENST00000409262.3	p.G452R		8:38	7:54		NA	NA	0.0	0
TET3	200424	SNU16_STOMACH	37	2	74274971	74274971	Missense_Mutation	SNP	C	T	NA	ENST00000409262.3	p.H508Y	NA	6:7	16:27	18:18	NA	NA	4.135e-05	0
TET3	200424	T24_URINARY_TRACT	37	2	74273523	74273523	Missense_Mutation	SNP	G	C	NA	ENST00000409262.3	p.R25T	NA	23:16	10:6	33:22	NA	NA	0.0	0
TET3	200424	BT474_BREAST	37	2	74274165	74274165	Missense_Mutation	SNP	C	G	NA	ENST00000409262.3	p.S239C	NA	14:27	29:30	65:58	NA	NA	0.0	0
TET3	200424	CAOV3_OVARY	37	2	74327904	74327904	Missense_Mutation	SNP	C	T	NA	ENST00000409262.3	p.P1195L	NA	14:19	11:12	41:43	NA	NA	1.652e-05	0
TET3	200424	FUOV1_OVARY	37	2	74275020	74275020	Missense_Mutation	SNP	C	T	NA	ENST00000409262.3	p.P524L	NA	7:24	NA	14:29	NA	NA	0.0	0
TET3	200424	HEC1A_ENDOMETRIUM	37	2	74326732	74326732	Silent	SNP	G	A	NA	ENST00000409262.3	p.S1064S	NA	14:23	17:23	NA	NA	NA	0.0	0
TET3	200424	HT115_LARGE_INTESTINE	37	2	74275537	74275537	Splice_Site	SNP	C	T	NA	ENST00000409262.3	p.V696V	NA	6:11		49:53	NA	NA	0.0	0
TET3	200424	HT115_LARGE_INTESTINE	37	2	74328440	74328440	Nonsense_Mutation	SNP	C	T	NA	ENST00000409262.3	p.R1374*	NA	8:4	30:24	28:25	NA	NA	0.0	0
TET3	200424	IGROV1_OVARY	37	2	74327618	74327618	Missense_Mutation	SNP	G	A	NA	ENST00000409262.3	p.A1100T	NA	21:20	26:37	39:35	NA	NA	2.478e-05	0
TET3	200424	JHUEM1_ENDOMETRIUM	37	2	74328184	74328184	Silent	SNP	C	T	NA	ENST00000409262.3	p.S1288S	NA	9:5	99:129	NA	NA	NA	4.135e-05	0
TET3	200424	KM12_LARGE_INTESTINE	37	2	74329240	74329240	Silent	SNP	G	A	NA	ENST00000409262.3	p.S1640S	NA	18:20	17:22		NA	NA	2.653e-05	0
TET3	200424	LOVO_LARGE_INTESTINE	37	2	74274451	74274451	Silent	SNP	C	T	NA	ENST00000409262.3	p.S334S	NA	13:17	18:29	19:29	NA	NA	3.306e-05	0
TET3	200424	LS513_LARGE_INTESTINE	37	2	74273984	74273984	Missense_Mutation	SNP	G	A	NA	ENST00000409262.3	p.G179S	NA	17:10	23:32	13:18	NA	NA	1.654e-05	0
TET3	200424	MDAMB157_BREAST	37	2	74273988	74273988	Missense_Mutation	SNP	T	C	NA	ENST00000409262.3	p.L180P	NA	6:26	15:31		NA	NA	0.0	0
TET3	200424	MDAMB361_BREAST	37	2	74328891	74328891	Missense_Mutation	SNP	C	T	NA	ENST00000409262.3	p.A1524V	NA	4:33			NA	NA	0.0	0
TET3	200424	MFE319_ENDOMETRIUM	37	2	74315083	74315083	Missense_Mutation	SNP	G	A	NA	ENST00000409262.3	p.G801R	NA	22:9	39:31	8:6	NA	NA	0.0	0
TET3	200424	MFE319_ENDOMETRIUM	37	2	74320752	74320752	Missense_Mutation	SNP	G	A	NA	ENST00000409262.3	p.A941T	NA	25:18	51:42	78:75	NA	NA	0.0	0
TET3	200424	PANC0327_PANCREAS	37	2	74274384	74274384	Missense_Mutation	SNP	G	A	NA	ENST00000409262.3	p.R312Q	NA	32:13	7:10	53:37	NA	NA	1.653e-05	0
TET3	200424	PANC0327_PANCREAS	37	2	74328102	74328102	Missense_Mutation	SNP	T	C	NA	ENST00000409262.3	p.I1261T	NA	25:20		45:14	NA	NA	8.264e-06	0
TET3	200424	PANC1_PANCREAS	37	2	74317097	74317097	Missense_Mutation	SNP	A	G	NA	ENST00000409262.3	p.M853V	NA	31:4	27:12	NA	NA	NA	0.0	0
TET3	200424	RL952_ENDOMETRIUM	37	2	74274248	74274248	Missense_Mutation	SNP	C	T	NA	ENST00000409262.3	p.R267W	NA	31:18	80:53	160:84	NA	NA	3.307e-05	0
TET3	200424	SKMEL2_SKIN	37	2	74274478	74274478	Silent	SNP	C	T	NA	ENST00000409262.3	p.F343F	NA	21:16	NA	19:21	NA	NA	0.0	0
TET3	200424	SKMEL5_SKIN	37	2	74274159	74274159	Missense_Mutation	SNP	A	C	NA	ENST00000409262.3	p.Q237P	NA	25:26	8:10	88:87	NA	NA	0.0	0
TET3	200424	SNU407_LARGE_INTESTINE	37	2	74274323	74274323	Missense_Mutation	SNP	G	A	NA	ENST00000409262.3	p.A292T	NA	15:10		28:36	NA	NA	8.265e-06	0
TET3	200424	SW948_LARGE_INTESTINE	37	2	74328187	74328187	Missense_Mutation	SNP	G	C	NA	ENST00000409262.3	p.E1289D	NA	7:37	18:78	9:50	NA	NA	0.0	0
TET3	200424	TE1_OESOPHAGUS	37	2	74329187	74329187	Missense_Mutation	SNP	G	C	NA	ENST00000409262.3	p.E1623Q	NA	14:20	15:24	3:10	NA	NA	0.0	0
TET3	200424	451LU_SKIN	37	2	74274419	74274419	Missense_Mutation	SNP	C	T	NA	ENST00000409262.3	p.P324S	NA	NA	NA	39:12	NA	NA	0.0	0
TET3	200424	639V_URINARY_TRACT	37	2	74273589	74273589	Missense_Mutation	SNP	G	T	NA	ENST00000409262.3	p.W47L	NA	NA		14:39	NA	NA	0.0	0
TET3	200424	ASH3_THYROID	37	2	74274255	74274255	Missense_Mutation	SNP	C	T	NA	ENST00000409262.3	p.P269L	NA	NA	NA	117:56	NA	NA	8.268e-06	0
TET3	200424	BE2M17_AUTONOMIC_GANGLIA	37	2	74274672	74274672	Missense_Mutation	SNP	T	G	NA	ENST00000409262.3	p.V408G	NA	NA	NA	22:17	NA	NA	0.0	0
TET3	200424	BICR78_UPPER_AERODIGESTIVE_TRACT	37	2	74320041	74320041	Missense_Mutation	SNP	C	T	NA	ENST00000409262.3	p.R883W	NA	NA	NA	12:15	NA	NA	8.296e-06	0
TET3	200424	CAL148_BREAST	37	2	74307693	74307693	Missense_Mutation	SNP	C	G	NA	ENST00000409262.3	p.S750C	NA	NA	153:155	15:22	NA	NA	0.0	0
TET3	200424	CAL72_BONE	37	2	74328266	74328266	Missense_Mutation	SNP	G	A	NA	ENST00000409262.3	p.G1316S	NA	NA	NA	39:56	NA	NA	4.133e-05	0
TET3	200424	CESS_HAEMATOPOIETIC_AND_LYMPHOID_TISSUE	37	2	74274405	74274405	Missense_Mutation	SNP	G	A	NA	ENST00000409262.3	p.R319H	NA	NA	NA	48:32	NA	NA	8.266e-06	0
TET3	200424	CGTHW1_THYROID	37	2	74329021	74329021	Silent	SNP	C	G	NA	ENST00000409262.3	p.P1567P	NA	NA	NA	5:16	NA	NA	0.0	0
TET3	200424	COLO680N_OESOPHAGUS	37	2	74273832	74273832	Missense_Mutation	SNP	C	A	NA	ENST00000409262.3	p.A128E	NA	NA	31:2	58:21	NA	NA	0.0	0
TET3	200424	COLO792_SKIN	37	2	74273719	74273719	Silent	SNP	C	T	NA	ENST00000409262.3	p.N90N	NA	NA	22:31	19:11	NA	NA	0.0	0
TET3	200424	CP66MEL_SKIN	37	2	74326688	74326688	Missense_Mutation	SNP	G	A	NA	ENST00000409262.3	p.E1050K	NA	NA	NA	4:7	NA	NA	0.0	0
TET3	200424	CP67MEL_SKIN	37	2	74273657	74273657	Missense_Mutation	SNP	G	A	NA	ENST00000409262.3	p.A70T	NA	NA	NA	17:14	NA	NA	0.0	0
TET3	200424	CW2_LARGE_INTESTINE	37	2	74274851	74274851	Missense_Mutation	SNP	G	A	NA	ENST00000409262.3	p.V468I	NA	NA	27:34	28:18	NA	NA	0.0	0
TET3	200424	CW2_LARGE_INTESTINE	37	2	74275271	74275271	Missense_Mutation	SNP	C	T	NA	ENST00000409262.3	p.P608S	NA	NA	20:32	58:55	NA	NA	0.0	0
TET3	200424	CW2_LARGE_INTESTINE	37	2	74328186	74328186	Missense_Mutation	SNP	A	G	NA	ENST00000409262.3	p.E1289G	NA	NA	31:42	16:20	NA	NA	0.0	0
TET3	200424	EN_ENDOMETRIUM	37	2	74273944	74273944	Missense_Mutation	SNP	G	C	NA	ENST00000409262.3	p.E165D	NA	NA	20:36	30:27	NA	NA	0.0	0
TET3	200424	GMEL_SKIN	37	2	74317147	74317147	Silent	SNP	C	T	NA	ENST00000409262.3	p.F869F	NA	NA	NA	55:85	NA	NA	0.0	0
TET3	200424	H9_HAEMATOPOIETIC_AND_LYMPHOID_TISSUE	37	2	74274866	74274866	Nonsense_Mutation	SNP	C	T	NA	ENST00000409262.3	p.Q473*	NA	NA	NA	54:17	NA	NA	0.0	0
TET3	200424	H9_HAEMATOPOIETIC_AND_LYMPHOID_TISSUE	37	2	74275032	74275032	Missense_Mutation	SNP	C	T	NA	ENST00000409262.3	p.S528F	NA	NA	NA	27:70	NA	NA	0.0	0
TET3	200424	HPAFII_PANCREAS	37	2	74273501	74273501	Missense_Mutation	SNP	G	A	NA	ENST00000409262.3	p.G18R	NA	NA	13:13	36:35	NA	NA	0.0	0
TET3	200424	HT55_LARGE_INTESTINE	37	2	74275364	74275364	Missense_Mutation	SNP	C	T	NA	ENST00000409262.3	p.H639Y		NA		17:50	NA	NA	0.0	0
TET3	200424	IGROV1_OVARY	37	2	74328871	74328871	Silent	SNP	C	T	NA	ENST00000409262.3	p.G1517G	NA			9:65	NA	NA	1.654e-05	0
TET3	200424	JAR_PLACENTA	37	2	74274378	74274378	Missense_Mutation	SNP	C	T	NA	ENST00000409262.3	p.T310M	NA	NA	NA	33:45	NA	NA	4.133e-05	0
TET3	200424	JVM2_HAEMATOPOIETIC_AND_LYMPHOID_TISSUE	37	2	74273575	74273575	Missense_Mutation	SNP	C	A	NA	ENST00000409262.3	p.D42E	NA	NA	17:29	44:40	NA	NA	0.0	0
TET3	200424	KARPAS422_HAEMATOPOIETIC_AND_LYMPHOID_TISSUE	37	2	74329061	74329061	Silent	SNP	C	T	NA	ENST00000409262.3	p.L1581L	NA	NA	40:25	68:25	NA	NA	0.0	0
TET3	200424	KMH2_THYROID	37	2	74320744	74320744	Missense_Mutation	SNP	G	T	NA	ENST00000409262.3	p.C938F	NA	NA	NA	26:51	NA	NA	0.0	0
TET3	200424	KP1N_PANCREAS	37	2	74317097	74317097	Missense_Mutation	SNP	A	G	NA	ENST00000409262.3	p.M853V	NA	NA	NA	120:60	NA	NA	0.0	0
TET3	200424	L540_HAEMATOPOIETIC_AND_LYMPHOID_TISSUE	37	2	74317084	74317084	Silent	SNP	T	C	NA	ENST00000409262.3	p.G848G	NA	NA	14:36	68:172	NA	NA	0.0	0
TET3	200424	MCC13_SKIN	37	2	74274563	74274563	Missense_Mutation	SNP	C	T	NA	ENST00000409262.3	p.L372F	NA	NA	NA	41:42	NA	NA	0.0	0
TET3	200424	MEWO_SKIN	37	2	74273882	74273882	Missense_Mutation	SNP	C	T	NA	ENST00000409262.3	p.P145S	NA	NA	10:5	32:31	NA	NA	0.0	0
TET3	200424	MEWO_SKIN	37	2	74326552	74326552	Silent	SNP	C	T	NA	ENST00000409262.3	p.I1004I	NA	NA	16:19	12:6	NA	NA	0.0	0
TET3	200424	MOLT13_HAEMATOPOIETIC_AND_LYMPHOID_TISSUE	37	2	74328962	74328962	Missense_Mutation	SNP	C	T	NA	ENST00000409262.3	p.R1548C	NA	NA	29:63	46:48	NA	NA	0.0	0
TET3	200424	NALM6_HAEMATOPOIETIC_AND_LYMPHOID_TISSUE	37	2	74328911	74328911	Missense_Mutation	SNP	G	A	NA	ENST00000409262.3	p.E1531K	NA	NA	33:52	65:60	NA	NA	0.0	0
TET3	200424	NCIH1155_LUNG	37	2	74274628	74274628	Silent	SNP	G	A	NA	ENST00000409262.3	p.L393L	NA	NA	21:15	21:14	NA	NA	0.0	0
TET3	200424	NCIH128_LUNG	37	2	74275384	74275384	Silent	SNP	G	A	NA	ENST00000409262.3	p.Q645Q	NA	NA	NA	22:52	NA	NA	0.0	0
TET3	200424	NCIH1573_LUNG	37	2	74274868	74274868	Missense_Mutation	SNP	G	C	NA	ENST00000409262.3	p.Q473H	NA	NA	26:31	14:28	NA	NA	0.0	0
TET3	200424	NCIH1838_LUNG	37	2	74274258	74274258	Missense_Mutation	SNP	C	T	NA	ENST00000409262.3	p.S270L	NA	NA	21:14	71:80	NA	NA	0.0	0
TET3	200424	NCIH2110_LUNG	37	2	74275062	74275062	Missense_Mutation	SNP	G	T	NA	ENST00000409262.3	p.R538M	NA	NA	26:44	19:52	NA	NA	0.0	0
TET3	200424	NCIH2110_LUNG	37	2	74327929	74327929	Silent	SNP	C	G	NA	ENST00000409262.3	p.A1203A	NA	NA	46:25	33:11	NA	NA	0.0	0
TET3	200424	NCIH2291_LUNG	37	2	74327540	74327540	Missense_Mutation	SNP	T	G	NA	ENST00000409262.3	p.L1074V	NA	NA	10:12	19:57	NA	NA	0.0	0
TET3	200424	NCIH2347_LUNG	37	2	74273663	74273663	Missense_Mutation	SNP	G	T	NA	ENST00000409262.3	p.A72S	NA	NA	17:20	19:18	NA	NA	0.0	0
TET3	200424	NCIH2405_LUNG	37	2	74275227	74275227	Missense_Mutation	SNP	C	T	NA	ENST00000409262.3	p.P593L	NA	NA		50:37	NA	NA	0.0	0
TET3	200424	NCIH513_PLEURA	37	2	74328743	74328743	Nonsense_Mutation	SNP	G	T	NA	ENST00000409262.3	p.E1475*	NA	NA	NA	6:15	NA	NA	0.0	0
TET3	200424	NCIH630_LARGE_INTESTINE	37	2	74328869	74328869	Missense_Mutation	SNP	G	A	NA	ENST00000409262.3	p.G1517S	NA	NA	NA	36:29	NA	NA	0.0	0
TET3	200424	NCIH740_LUNG	37	2	74328283	74328283	Missense_Mutation	SNP	G	T	NA	ENST00000409262.3	p.W1321C	NA	NA	NA	29:17	NA	NA	0.0	0
TET3	200424	NCIH835_LUNG	37	2	74329146	74329146	Missense_Mutation	SNP	G	T	NA	ENST00000409262.3	p.R1609L	NA	NA	NA	7:17	NA	NA	0.0	0
TET3	200424	OVKATE_OVARY	37	2	74328647	74328647	Missense_Mutation	SNP	G	C	NA	ENST00000409262.3	p.A1443P	NA	NA	25:24	11:12	NA	NA	0.0	0
TET3	200424	PCI38_UPPER_AERODIGESTIVE_TRACT	37	2	74273946	74273946	Missense_Mutation	SNP	G	A	NA	ENST00000409262.3	p.R166Q	NA	NA	NA	57:22	NA	NA	1.654e-05	0
TET3	200424	RAJI_HAEMATOPOIETIC_AND_LYMPHOID_TISSUE	37	2	74328397	74328397	Silent	SNP	C	T	NA	ENST00000409262.3	p.P1359P	NA	NA	36:25	8:12	NA	NA	4.966e-05	0
TET3	200424	REH_HAEMATOPOIETIC_AND_LYMPHOID_TISSUE	37	2	74275003	74275003	Silent	SNP	C	T	NA	ENST00000409262.3	p.G518G	NA	NA		19:44	NA	NA	8.269e-06	0
TET3	200424	SARC9371_BONE	37	2	74273557	74273557	Silent	SNP	G	C	NA	ENST00000409262.3	p.G36G	NA	NA	NA	28:30	NA	NA	3.311e-05	0
TET3	200424	SAS_UPPER_AERODIGESTIVE_TRACT	37	2	74326657	74326657	Silent	SNP	G	A	NA	ENST00000409262.3	p.K1039K	NA	NA	NA	10:17	NA	NA	1.654e-05	0
TET3	200424	SBC1_LUNG	37	2	74315078	74315078	Missense_Mutation	SNP	G	T	NA	ENST00000409262.3	p.S799I	NA	NA	NA	3:6	NA	NA	0.0	0
TET3	200424	SC1_HAEMATOPOIETIC_AND_LYMPHOID_TISSUE	37	2	74273463	74273463	Missense_Mutation	SNP	C	A	NA	ENST00000409262.3	p.P5Q	NA	NA	NA	56:49	NA	NA	3.414e-05	0
TET3	200424	SJSA1_BONE	37	2	74275257	74275257	Missense_Mutation	SNP	A	G	NA	ENST00000409262.3	p.Q603R	NA	NA		58:74	NA	NA	8.277e-06	0
TET3	200424	SKUT1_SOFT_TISSUE	37	2	74274651	74274651	Missense_Mutation	SNP	G	A	NA	ENST00000409262.3	p.R401H	NA			25:32	NA	NA	1.65e-05	0
TET3	200424	SNU1040_LARGE_INTESTINE	37	2	74273866	74273866	Silent	SNP	C	T	NA	ENST00000409262.3	p.C139C	NA	NA	37:18	13:38	NA	NA	0.0	0
TET3	200424	SNU1040_LARGE_INTESTINE	37	2	74274541	74274541	Silent	SNP	G	A	NA	ENST00000409262.3	p.P364P	NA	NA	14:25	14:12	NA	NA	4.137e-05	0
TET3	200424	SNU1040_LARGE_INTESTINE	37	2	74320089	74320089	Nonsense_Mutation	SNP	C	T	NA	ENST00000409262.3	p.R899*	NA	NA	27:32	11:10	NA	NA	0.0	0
TET3	200424	SNU1040_LARGE_INTESTINE	37	2	74320675	74320675	Missense_Mutation	SNP	C	T	NA	ENST00000409262.3	p.A915V	NA	NA	34:32	35:16	NA	NA	0.0	0
TET3	200424	SNUC2B_LARGE_INTESTINE	37	2	74273666	74273666	Missense_Mutation	SNP	G	A	NA	ENST00000409262.3	p.E73K	NA	NA	NA	6:12	NA	NA	8.274e-06	0
TET3	200424	STS0421_SOFT_TISSUE	37	2	74273803	74273803	Silent	SNP	T	G	NA	ENST00000409262.3	p.L118L	NA	NA	NA	14:32	NA	NA	0.0	0
TET3	200424	SUPHD1_HAEMATOPOIETIC_AND_LYMPHOID_TISSUE	37	2	74274971	74274971	Missense_Mutation	SNP	C	T	NA	ENST00000409262.3	p.H508Y		NA	NA	26:23	NA	NA	4.135e-05	0
TET3	200424	SW684_SOFT_TISSUE	37	2	74327783	74327783	Missense_Mutation	SNP	C	T	NA	ENST00000409262.3	p.P1155S	NA	NA	NA	91:153	NA	NA	0.0	0
TET3	200424	TCCSUP_URINARY_TRACT	37	2	74328873	74328873	Missense_Mutation	SNP	G	C	NA	ENST00000409262.3	p.G1518A	NA	NA	55:0	52:0	NA	NA	0.0	0
TET3	200424	UDSCC2_UPPER_AERODIGESTIVE_TRACT	37	2	74275391	74275391	Missense_Mutation	SNP	A	T	NA	ENST00000409262.3	p.T648S	NA	NA	NA	45:61	NA	NA	0.0	0
TET3	200424	YT_HAEMATOPOIETIC_AND_LYMPHOID_TISSUE	37	2	74275528	74275528	Silent	SNP	C	T	NA	ENST00000409262.3	p.C693C	NA	NA	NA	50:40	NA	NA	8.27e-06	0
TET3	200424	ZR7530_BREAST	37	2	74317132	74317132	Missense_Mutation	SNP	G	C	NA	ENST00000409262.3	p.K864N	NA	NA	21:13	107:52	NA	NA	0.0	0
TET3	200424	CP66EBV_MATCHED_NORMAL_TISSUE	37	2	74273685	74273685	Missense_Mutation	SNP	G	A	NA	ENST00000409262.3	p.G79E	NA	NA	NA	17:23	NA	NA	0.0	0
TET3	200424	CP67MEL_SKIN	37	2	74326583	74326583	Nonsense_Mutation	SNP	C	T	NA	ENST00000409262.3	p.R1015*	NA	NA	NA	8:16	NA	NA	0.0	0
TET3	200424	DAUDI_HAEMATOPOIETIC_AND_LYMPHOID_TISSUE	37	2	74273695	74273695	Silent	SNP	C	T	NA	ENST00000409262.3	p.S82S	NA	NA		7:52	NA	NA	0.0	0
TET3	200424	DAUDI_HAEMATOPOIETIC_AND_LYMPHOID_TISSUE	37	2	74274499	74274499	Silent	SNP	T	C	NA	ENST00000409262.3	p.P350P	NA	NA		11:54	NA	NA	0.0	0
TET3	200424	DAUDI_HAEMATOPOIETIC_AND_LYMPHOID_TISSUE	37	2	74275061	74275061	Missense_Mutation	SNP	A	G	NA	ENST00000409262.3	p.R538G	NA	NA		21:76	NA	NA	0.0	0
TET3	200424	DAUDI_HAEMATOPOIETIC_AND_LYMPHOID_TISSUE	37	2	74275096	74275096	Silent	SNP	G	A	NA	ENST00000409262.3	p.R549R	NA	NA		11:75	NA	NA	0.0	0
TET3	200424	DAUDI_HAEMATOPOIETIC_AND_LYMPHOID_TISSUE	37	2	74328181	74328181	Silent	SNP	G	C	NA	ENST00000409262.3	p.L1287L	NA	NA		32:42	NA	NA	8.269e-06	0
TET3	200424	DAUDI_HAEMATOPOIETIC_AND_LYMPHOID_TISSUE	37	2	74329000	74329000	Silent	SNP	G	A	NA	ENST00000409262.3	p.Q1560Q	NA	NA		48:75	NA	NA	0.0	0
TET3	200424	DAUDI_HAEMATOPOIETIC_AND_LYMPHOID_TISSUE	37	2	74329036	74329036	Silent	SNP	C	G	NA	ENST00000409262.3	p.A1572A	NA	NA		39:59	NA	NA	0.0	0
TET3	200424	DAUDI_HAEMATOPOIETIC_AND_LYMPHOID_TISSUE	37	2	74329045	74329045	Silent	SNP	A	G	NA	ENST00000409262.3	p.E1575E	NA	NA		28:55	NA	NA	0.0	0
TET3	200424	DAUDI_HAEMATOPOIETIC_AND_LYMPHOID_TISSUE	37	2	74329258	74329258	Silent	SNP	C	T	NA	ENST00000409262.3	p.S1646S	NA	NA		4:19	NA	NA	0.0	0
TET3	200424	DAUDI_HAEMATOPOIETIC_AND_LYMPHOID_TISSUE	37	2	74329261	74329261	Silent	SNP	T	C	NA	ENST00000409262.3	p.Y1647Y	NA	NA		5:18	NA	NA	0.0	0
TET3	200424	DAUDI_HAEMATOPOIETIC_AND_LYMPHOID_TISSUE	37	2	74329270	74329270	Silent	SNP	G	A	NA	ENST00000409262.3	p.T1650T	NA	NA		10:20	NA	NA	3.625e-05	0
TET3	200424	HEC1_ENDOMETRIUM	37	2	74315015	74315015	Missense_Mutation	SNP	G	A	NA	ENST00000409262.3	p.G778D	NA	NA	NA	3:9	NA	NA	0.0	0
TET3	200424	LS123_LARGE_INTESTINE	37	2	74275492	74275492	Silent	SNP	A	C	NA	ENST00000409262.3	p.T681T	NA	NA		4:23	NA	NA	0.0	0
TET3	200424	NALM6_HAEMATOPOIETIC_AND_LYMPHOID_TISSUE	37	2	74326732	74326732	Silent	SNP	G	A	NA	ENST00000409262.3	p.S1064S	NA	NA	38:23	9:6	NA	NA	0.0	0
TET3	200424	NCIH1770_LUNG	37	2	74315010	74315010	Silent	SNP	G	A	NA	ENST00000409262.3	p.R776R	NA	NA	NA	2:2	NA	NA	0.0	0
TET3	200424	OCIAML5_HAEMATOPOIETIC_AND_LYMPHOID_TISSUE	37	2	74329000	74329000	Silent	SNP	G	A	NA	ENST00000409262.3	p.Q1560Q		NA		7:55	NA	NA	0.0	0
TET3	200424	OCIAML5_HAEMATOPOIETIC_AND_LYMPHOID_TISSUE	37	2	74329036	74329036	Silent	SNP	C	G	NA	ENST00000409262.3	p.A1572A		NA		5:38	NA	NA	0.0	0
TET3	200424	OCIAML5_HAEMATOPOIETIC_AND_LYMPHOID_TISSUE	37	2	74329045	74329045	Silent	SNP	A	G	NA	ENST00000409262.3	p.E1575E		NA		4:34	NA	NA	0.0	0
TET3	200424	SCI1_HAEMATOPOIETIC_AND_LYMPHOID_TISSUE	37	2	74273463	74273463	Missense_Mutation	SNP	C	A	NA	ENST00000409262.3	p.P5Q	NA	NA	NA	54:48	NA	NA	3.414e-05	0
TET3	200424	SNU1040_LARGE_INTESTINE	37	2	74326583	74326583	Nonsense_Mutation	SNP	C	T	NA	ENST00000409262.3	p.R1015*	NA	NA	31:42	15:3	NA	NA	0.0	0
TET3	200424	639V_URINARY_TRACT	37	2	74320748	74320748	Silent	SNP	C	T	NA	ENST00000409262.3	p.A939A	NA	NA	9:34		NA	NA	0.0	0
TET3	200424	BICR18_UPPER_AERODIGESTIVE_TRACT	37	2	74320790	74320790	Silent	SNP	C	T	NA	ENST00000409262.3	p.T953T		NA	41:76	NA	NA	NA	3.307e-05	0
TET3	200424	BICR18_UPPER_AERODIGESTIVE_TRACT	37	2	74327552	74327552	Missense_Mutation	SNP	G	A	NA	ENST00000409262.3	p.G1078S		NA	27:72	NA	NA	NA	0.0	0
TET3	200424	BICR18_UPPER_AERODIGESTIVE_TRACT	37	2	74329000	74329000	Silent	SNP	G	A	NA	ENST00000409262.3	p.Q1560Q		NA	9:64	NA	NA	NA	0.0	0
TET3	200424	BICR18_UPPER_AERODIGESTIVE_TRACT	37	2	74329036	74329036	Silent	SNP	C	G	NA	ENST00000409262.3	p.A1572A		NA	10:72	NA	NA	NA	0.0	0
TET3	200424	EWS502_BONE	37	2	74274767	74274767	Missense_Mutation	SNP	C	A	NA	ENST00000409262.3	p.P440T	NA	NA	18:30	NA	NA	NA	4.136e-05	0
TET3	200424	HCC1588_LUNG	37	2	74273984	74273984	Missense_Mutation	SNP	G	A	NA	ENST00000409262.3	p.G179S	NA	NA	29:35	NA	NA	NA	1.654e-05	0
TET3	200424	HUT78_HAEMATOPOIETIC_AND_LYMPHOID_TISSUE	37	2	74274866	74274866	Nonsense_Mutation	SNP	C	T	NA	ENST00000409262.3	p.Q473*	NA	NA	27:32	NA	NA	NA	0.0	0
TET3	200424	HUT78_HAEMATOPOIETIC_AND_LYMPHOID_TISSUE	37	2	74275032	74275032	Missense_Mutation	SNP	C	T	NA	ENST00000409262.3	p.S528F	NA	NA	43:25	NA	NA	NA	0.0	0
TET3	200424	JHOM1_OVARY	37	2	74307673	74307673	Silent	SNP	G	A	NA	ENST00000409262.3	p.T743T	NA	NA	9:11	NA	NA	NA	4.136e-05	0
TET3	200424	NCIH2106_LUNG	37	2	74315010	74315010	Silent	SNP	G	A	NA	ENST00000409262.3	p.R776R	NA	NA	48:60	NA	NA	NA	0.0	0
TET3	200424	NCIH322_LUNG	37	2	74328896	74328896	Missense_Mutation	SNP	G	A	NA	ENST00000409262.3	p.G1526S	NA	NA	33:68		NA	NA	0.0	0
TET3	200424	OC314_OVARY	37	2	74326405	74326405	Silent	SNP	C	T	NA	ENST00000409262.3	p.V955V	NA	NA	9:21		NA	NA	0.0	0
TET3	200424	SKNBE2_AUTONOMIC_GANGLIA	37	2	74274672	74274672	Missense_Mutation	SNP	T	G	NA	ENST00000409262.3	p.V408G	NA	NA	64:80	NA	NA	NA	0.0	0
TET3	200424	SW1417_LARGE_INTESTINE	37	2	74328425	74328425	Missense_Mutation	SNP	T	A	NA	ENST00000409262.3	p.S1369T	NA	NA	4:26		NA	NA	0.0	0
TET3	200424	HEC6_ENDOMETRIUM	37	2	74274774	74274776	In_Frame_Del	DEL	AGA	-	NA	ENST00000409262.3	p.K446del	7:20	NA	27:69	NA	NA	NA	5.791e-05	0
TET3	200424	NALM19_HAEMATOPOIETIC_AND_LYMPHOID_TISSUE	37	2	74329188	74329190	In_Frame_Del	DEL	AGA	-	NA	ENST00000409262.3	p.K1625del	3:3	NA		NA	NA	NA	0.0002929	0
TET3	200424	SNUC4_LARGE_INTESTINE	37	2	74274174	74274174	Frame_Shift_Del	DEL	C	-	NA	ENST00000409262.3	p.T242fs	39:28	NA	17:15	NA	NA	NA	0.0	0
TET3	200424	TEN_ENDOMETRIUM	37	2	74329188	74329190	In_Frame_Del	DEL	AGA	-	NA	ENST00000409262.3	p.K1625del	7:8	NA	26:32	NA	NA	NA	0.0002929	0
TET3	200424	EFO27_OVARY	37	2	74329152	74329152	Frame_Shift_Del	DEL	G	-	NA	ENST00000409262.3	p.W1611fs	NA	13:26	15:15		NA	NA	0.0	0
TET3	200424	HCT116_LARGE_INTESTINE	37	2	74329152	74329152	Frame_Shift_Del	DEL	G	-	NA	ENST00000409262.3	p.W1611fs	NA	22:36	30:20	5:10	NA	NA	0.0	0
TET3	200424	SNU423_LIVER	37	2	74329188	74329190	In_Frame_Del	DEL	AGA	-	NA	ENST00000409262.3	p.K1625del	NA	10:20	7:12		NA	NA	0.0002929	0
TET3	200424	P30OHK_HAEMATOPOIETIC_AND_LYMPHOID_TISSUE	37	2	74274174	74274174	Frame_Shift_Del	DEL	C	-	NA	ENST00000409262.3	p.T242fs	NA	NA	NA	42:69	NA	NA	0.0	0
TET3	200424	BICR18_UPPER_AERODIGESTIVE_TRACT	37	2	74329069	74329074	In_Frame_Del	DEL	GAGGGC	-	NA	ENST00000409262.3	p.RA1586del		NA	8:72	NA	NA	NA	0.0	0
TET3	200424	PC9_LUNG	37	2	74328058	74328058	Frame_Shift_Del	DEL	C	-	NA	ENST00000409262.3	p.D1246fs	NA	NA	22:47	NA	NA	NA	0.0	0
TET3	200424	SNU738_CENTRAL_NERVOUS_SYSTEM	37	2	74329188	74329190	In_Frame_Del	DEL	AGA	-	NA	ENST00000409262.3	p.K1625del		NA	11:67	NA	NA	NA	0.0002929	0
