# Supplementary material for: Expression and prognosis analysis of TET family in acute myeloid leukemia
Source: Aging (Albany NY). 2020 Mar 25;12(6):5031–47. doi: 10.18632/aging.102928 (PMC7138570; doi:10.18632/aging.102928)
Supplement: Supplementary Table 2 [file aging-12-102928-s003..xlsx]

## Sheet: Positively correlated
Supplementary Table 2. Different expressed genes of RNA for TET3high and TET3low.
logFC	logCPM	PValue	FDR	gene	ID
4.78061	1.95813	3.17822e-22	2.11246e-18	WNK3	65267
2.61617	6.60326	4.21331e-18	2.10034e-14	FCGR3A	2214
7.94144	1.06324	2.66848e-15	1.06419e-11	KCNH6	81033
4.94815	1.82074	5.75781e-15	1.91351e-11	CDH6	1004
7.72949	-0.452596	1.65918e-13	3.31351e-10	NPY2R	4887
6.62049	-0.525176	1.66174e-13	3.31351e-10	MNX1	3110
2.58471	2.28805	3.98519e-13	7.22407e-10	PNMA5	114824
2.31183	4.74467	5.79289e-13	9.62586e-10	VSIG4	11326
3.06283	2.4561	7.65084e-13	1.0897e-09	DAAM2	23500
2.52429	4.79156	9.0137e-13	1.19822e-09	PDK4	5166
3.45201	-0.159103	2.26466e-12	2.50874e-09	CDO1	1036
2.36367	-0.910475	4.71737e-12	4.70322e-09	LAMA2	3908
6.92938	-0.473834	7.63199e-12	7.24676e-09	ATP1B4	23439
4.72432	-1.47881	1.0682e-11	9.68177e-09	CTNND2	1501
3.24514	-1.7415	1.61147e-11	1.39708e-08	WSCD2	9671
2.05335	0.378176	2.29312e-11	1.9052e-08	OR52K2	119774
2.73234	3.74677	2.54151e-11	2.02711e-08	MSR1	4481
2.08919	3.75865	3.46665e-11	2.46875e-08	FCGBP	8857
5.70865	-0.966741	9.39711e-11	6.04446e-08	CNTNAP5	129684
1.80262	4.57622	9.95384e-11	6.20249e-08	CRISPLD2	83716
1.74189	3.8985	1.09387e-10	6.41522e-08	CXCL16	58191
6.28501	1.35637	1.39487e-10	7.726e-08	FOXF2	2295
2.02416	2.05819	2.52644e-10	1.25943e-07	LGR6	59352
2.04344	6.07032	2.78665e-10	1.35526e-07	MAFB	9935
1.87115	8.34809	3.02489e-10	1.41087e-07	LRP1	4035
2.47829	4.64625	3.0425e-10	1.41087e-07	C1QB	713
4.08267	-1.48706	3.6774e-10	1.66653e-07	SLC1A6	6511
2.39312	4.66908	4.0824e-10	1.7649e-07	C1QA	712
1.68741	5.64894	4.76666e-10	1.93974e-07	CHST15	51363
1.52781	0.605491	4.89488e-10	1.95208e-07	TMEM132A	54972
1.59643	3.32215	5.368e-10	2.05842e-07	GPBAR1	151306
2.71799	0.91642	6.22852e-10	2.34334e-07	OSBPL6	114880
6.34487	-0.67792	6.41103e-10	2.36733e-07	EPYC	1833
2.31554	-0.369226	1.16725e-09	3.75401e-07	CASP5	838
4.16961	-1.69853	1.24136e-09	3.86761e-07	FOXC2	2303
6.0447	-0.853948	1.57163e-09	4.67736e-07	FOXQ1	94234
1.61587	5.01833	1.6389e-09	4.80582e-07	HMOX1	3162
2.78042	1.91181	1.90528e-09	5.31456e-07	RPH3A	22895
1.64178	4.30981	1.919e-09	5.31456e-07	F5	2153
2.34939	0.0229586	1.98003e-09	5.35321e-07	GNG4	2786
3.04313	-1.92867	1.98665e-09	5.35321e-07	B4GALNT1	2583
2.3133	-0.340315	2.13995e-09	5.61454e-07	NTN4	59277
1.88268	6.33817	2.3187e-09	5.89187e-07	C5AR1	728
2.41531	3.31045	2.37374e-09	5.89187e-07	CEACAM8	1088
1.76316	4.03683	3.0366e-09	7.29516e-07	APOBEC3A	200315
2.31496	-1.84722	3.8666e-09	8.96511e-07	VMO1	284013
1.64019	2.12902	4.78262e-09	1.07152e-06	CDKN2B	1030
2.58097	0.424196	5.01346e-09	1.11076e-06	PGM5	5239
2.39638	3.72351	6.11228e-09	1.31052e-06	CD300E	342510
3.85935	-1.73354	6.19494e-09	1.31412e-06	SLC7A3	84889
1.70282	4.27692	6.83732e-09	1.42017e-06	FCGR2C	9103
4.71257	-1.98437	7.34283e-09	1.50944e-06	CTAG2	30848
1.67253	5.98046	8.78429e-09	1.76928e-06	SLC7A7	9056
1.57363	7.43972	9.68793e-09	1.91265e-06	KCTD12	115207
1.62185	6.36895	1.08049e-08	2.08806e-06	LILRB2	10288
3.71509	-1.85419	1.14628e-08	2.17685e-06	PROX1	5629
1.86079	0.98068	1.50128e-08	2.72142e-06	ARHGAP29	9411
1.74784	3.99374	2.09966e-08	3.67256e-06	MS4A4A	51338
1.56741	0.625432	2.25499e-08	3.84312e-06	RPGRIP1	57096
3.44279	-2.08998	2.36008e-08	3.92386e-06	HOXC10	3226
3.42872	-0.849094	2.4066e-08	3.96592e-06	C7orf16	10842
4.86276	-0.871007	2.43387e-08	3.97799e-06	FOXF1	2294
2.80076	-0.235464	2.60446e-08	4.18814e-06	NRG1	3084
2.12523	4.06003	2.81347e-08	4.41737e-06	C1QC	714
1.65163	5.83887	2.92751e-08	4.52516e-06	LRRK2	120892
2.5695	-1.8117	3.3045e-08	4.91729e-06	ESRP1	54845
1.76997	-1.26484	3.509e-08	5.18292e-06	OR52K1	390036
1.70567	5.50305	4.45462e-08	6.28497e-06	LILRA6	79168
2.68507	-1.96822	5.07198e-08	6.95745e-06	CASR	846
2.1151	4.20053	5.09422e-08	6.95745e-06	EPB41L3	23136
1.63168	1.29764	5.25969e-08	7.13457e-06	SIGLEC11	114132
2.65033	-0.345737	5.44388e-08	7.18043e-06	PRTG	283659
2.63788	-0.155964	5.59869e-08	7.2966e-06	POF1B	79983
1.82	-0.518525	6.29738e-08	7.84811e-06	ZMYND15	84225
2.15155	3.64984	7.50144e-08	9.23326e-06	LILRA3	11026
1.64656	4.24693	8.29186e-08	1.00206e-05	SECTM1	6398
2.00709	1.83669	9.22053e-08	1.08151e-05	SMPDL3A	10924
1.7786	-1.59179	1.22285e-07	1.35138e-05	C1orf61	10485
3.75532	-2.81374	1.23346e-07	1.35138e-05	T	6862
3.59109	-2.77151	1.24811e-07	1.35996e-05	PTPRZ1	5803
2.82464	-2.47289	1.44201e-07	1.51335e-05	KCNA7	3743
2.32353	-2.89526	1.57521e-07	1.63592e-05	TMEM132D	121256
1.97964	1.26112	1.65327e-07	1.70686e-05	ADAMDEC1	27299
1.52614	7.25256	1.72934e-07	1.75934e-05	CX3CR1	1524
2.46018	-0.912118	1.78797e-07	1.79156e-05	LOC152225	152225
1.66258	1.13277	1.99803e-07	1.9493e-05	UNC5A	90249
1.72641	5.92273	2.34207e-07	2.24524e-05	TLR8	51311
2.06733	2.26296	2.83477e-07	2.61691e-05	SASH1	23328
1.70788	0.0497088	3.34971e-07	2.94913e-05	LIPN	643418
2.35432	-1.4034	3.37212e-07	2.94913e-05	GRM4	2914
3.41971	-2.95828	3.57381e-07	3.07163e-05	HTR2C	3358
2.29181	-1.42818	3.82561e-07	3.24607e-05	MEIS3	56917
1.6811	2.55822	4.16547e-07	3.46373e-05	EMR3	84658
1.98456	-2.11952	5.01631e-07	3.94686e-05	C17orf77	146723
3.02545	-3.03654	5.01848e-07	3.94686e-05	DNAJC5G	285126
2.48129	0.370265	5.0276e-07	3.94686e-05	GLRB	2743
1.59662	5.44889	6.58094e-07	4.81463e-05	FPR1	2357
1.92411	1.41449	7.10255e-07	5.12162e-05	WLS	79971
2.72885	-1.71011	7.193e-07	5.15929e-05	CHST8	64377
1.94582	0.798758	7.67726e-07	5.40935e-05	FOLR3	2352
1.70241	10.2687	7.97863e-07	5.56272e-05	VCAN	1462
2.27697	2.68017	8.76654e-07	5.96006e-05	MARCO	8685
3.53001	-2.855	9.78409e-07	6.51984e-05	DCAF4L2	138009
1.98096	-2.03722	1.27526e-06	8.10501e-05	PCSK9	255738
3.36658	-2.81416	1.28059e-06	8.10632e-05	PRDM14	63978
1.73669	-1.16168	1.38149e-06	8.52846e-05	GPR120	338557
1.99126	-1.69798	1.40675e-06	8.65761e-05	CYP26B1	56603
3.39859	-2.93512	1.43893e-06	8.82838e-05	MAGEC1	9947
1.91132	7.1807	1.55011e-06	9.42354e-05	CD163	9332
1.71131	4.5703	1.5866e-06	9.58693e-05	LILRA5	353514
1.67846	0.855127	1.59912e-06	9.63336e-05	COLEC12	81035
1.52267	4.8499	1.77367e-06	0.000104636	CYP1B1	1545
2.66644	-1.55479	1.80715e-06	0.000105984	MRAP2	112609
1.92819	-0.928797	1.81733e-06	0.000106268	BMPER	168667
1.66463	-1.20858	1.89443e-06	0.000109176	PTGES	9536
3.37737	-2.72219	1.92903e-06	0.000110735	IGFL2	147920
4.29148	-1.54143	1.95077e-06	0.000111457	SLC5A12	159963
2.15144	-1.58887	2.03522e-06	0.000114964	ATP1A4	480
3.36778	-2.7241	2.14105e-06	0.000119587	BARX2	8538
2.16321	0.778919	2.22146e-06	0.000122365	HIF3A	64344
1.53464	1.4531	2.48049e-06	0.00013296	PID1	55022
2.83047	-1.85251	2.61907e-06	0.000138023	C6orf138	442213
3.12872	-2.6485	2.7075e-06	0.000141329	KCND2	3751
1.51841	-0.567049	2.82406e-06	0.00014476	EBI3	10148
2.57282	-2.83543	2.84515e-06	0.000144942	LOC157627	157627
2.75696	-3.11727	2.94728e-06	0.000149539	KLK7	5650
2.22474	5.54592	3.21151e-06	0.000160094	LTF	4057
1.66511	-0.302563	3.57405e-06	0.000170087	ORM1	5004
2.6568	-2.53176	3.89844e-06	0.000182906	HOXC9	3225
1.66822	-0.301307	4.87774e-06	0.000221239	HEPH	9843
1.56808	-1.44108	4.88191e-06	0.000221239	MSX1	4487
1.63593	2.66976	5.50443e-06	0.000243907	GLT1D1	144423
1.58607	-1.97249	5.91707e-06	0.000259311	GPR20	2843
2.30337	-1.11852	6.223e-06	0.000268703	PGA3	643834
1.61877	7.20292	6.76387e-06	0.000288219	THBS1	7057
3.98879	-1.84761	6.78746e-06	0.000288219	POU3F3	5455
1.53998	4.37785	7.06609e-06	0.000296627	TIMP3	7078
2.18506	-2.72363	7.67843e-06	0.00031276	LOC100130148	100130148
1.58288	4.78756	8.78487e-06	0.000346395	AQP9	366
2.13856	-0.449401	8.90915e-06	0.000349702	RND3	390
3.09519	-2.18173	1.00559e-05	0.000383417	PGA4	643847
1.92515	-2.58227	1.00565e-05	0.000383417	SLC34A1	6569
2.44257	-2.36935	1.02859e-05	0.000388202	EPS8L3	79574
2.97397	-2.41553	1.03687e-05	0.000390099	FAM133A	286499
3.13367	-2.90441	1.05086e-05	0.00039176	C1orf87	127795
2.19644	-0.894018	1.09381e-05	0.000404649	ROR1	4919
1.86897	1.87167	1.11218e-05	0.00040843	VGLL3	389136
2.48607	-3.08675	1.16737e-05	0.000423226	REG1B	5968
3.03791	-0.967631	1.17816e-05	0.000425437	C1orf141	400757
2.30986	-3.09131	1.19548e-05	0.000428738	MAS1L	116511
1.6852	4.70297	1.2852e-05	0.000452771	SIGLEC1	6614
2.89132	-2.53227	1.40932e-05	0.000491291	ACTG2	72
1.61712	6.09101	1.45541e-05	0.000503834	PLBD1	79887
1.59908	-1.83807	1.80096e-05	0.000604566	OTX1	5013
2.32965	-1.4607	1.84044e-05	0.000614712	HOXC6	3223
2.50131	-1.50224	1.93167e-05	0.000638765	ST6GALNAC5	81849
1.59555	-1.06725	1.95357e-05	0.00064387	ACCN4	55515
2.89868	-2.8276	1.98284e-05	0.000652438	HYAL4	23553
2.56407	-2.09128	2.27059e-05	0.000726736	SH3GL3	6457
2.03646	-2.54727	2.39409e-05	0.000757748	ORM2	5005
2.56591	-3.13572	2.58961e-05	0.00080057	CGA	1081
1.55745	0.476466	2.93409e-05	0.000886451	CEACAM3	1084
2.38207	-2.71339	3.2092e-05	0.000938466	GDF2	2658
1.92313	0.411339	3.44412e-05	0.000993859	ABCA8	10351
1.61724	3.52305	3.49338e-05	0.00100313	IL1RL1	9173
2.21956	-2.87961	3.59626e-05	0.00102883	LOC340074	340074
2.20782	-2.02705	3.69905e-05	0.0010507	PRKAA2	5563
2.15574	0.411443	3.75033e-05	0.00105923	MAOB	4129
2.95104	-2.95801	3.79239e-05	0.00106658	SP9	100131390
2.26711	-1.83111	3.88858e-05	0.00108902	CRHR2	1395
2.99152	-1.41855	4.73933e-05	0.0012634	LOC84856	84856
1.50104	-3.15436	5.12897e-05	0.0013401	VTCN1	79679
2.63093	-1.41044	5.13458e-05	0.0013401	TBX4	9496
1.87848	-0.470693	5.31486e-05	0.00137813	ARNT2	9915
1.61656	-2.0219	5.60011e-05	0.00144085	CLEC6A	93978
1.5603	1.70654	5.76321e-05	0.0014752	EPHB2	2048
2.11065	3.3383	6.09305e-05	0.00153792	IL1R2	7850
2.24546	-2.95496	6.96547e-05	0.00169587	OR5AU1	390445
1.93277	-1.98882	7.48328e-05	0.00179131	ACE2	59272
2.17781	-3.22436	8.40384e-05	0.00194852	OR10X1	128367
1.59048	1.09815	8.50293e-05	0.00196237	CAMP	820
2.55592	-2.1244	8.69019e-05	0.00198244	FGF12	2257
2.13167	-1.65214	8.69431e-05	0.00198244	C4BPA	722
1.9304	-2.15835	8.76861e-05	0.00198915	NPAS3	64067
1.56621	0.643169	8.91526e-05	0.00201998	PLA2G7	7941
1.79832	-0.308552	8.9248e-05	0.00201998	TACC2	10579
2.39584	-2.89638	9.13251e-05	0.00205321	EN2	2020
2.00715	-2.74335	9.86519e-05	0.0021593	HOXC8	3224
1.53513	-3.24671	0.000106571	0.00229484	VAX2	25806
2.44027	-2.35522	0.000116424	0.00246444	PTPN5	84867
2.09347	2.40613	0.000120602	0.00252414	FREM1	158326
1.78287	-1.97975	0.000123057	0.00256402	CPNE4	131034
2.71805	-2.47194	0.000124602	0.00258275	GPR158	57512
2.43806	-2.14954	0.000127094	0.00261263	C3orf72	401089
1.7344	-1.01869	0.000128755	0.00264201	TRIM29	23650
2.24273	-2.73574	0.00012895	0.00264261	PHF21B	112885
2.14493	-3.19217	0.000132056	0.0026842	PPP1R3A	5506
1.95006	-3.28966	0.000134183	0.00271636	PRNT	149830
1.99188	-1.00541	0.000140013	0.00279004	CADM3	57863
2.28796	-2.93867	0.000156145	0.00305547	LCE5A	254910
1.87011	0.97353	0.000158688	0.00307805	CD177	57126
1.73719	-1.57571	0.000161923	0.00312863	LRIG3	121227
1.88816	-2.80676	0.000163754	0.00315484	HOXC5	3222
1.61034	4.79409	0.000176027	0.00334921	MMP8	4317
1.9627	-3.17705	0.000180585	0.00341315	APOA4	337
1.82212	-2.64218	0.000188404	0.00352089	VCX3A	51481
2.43156	1.57048	0.00019961	0.00369223	RORB	6096
1.74954	-3.0231	0.000201365	0.00371436	HRCT1	646962
1.71004	0.845711	0.000201823	0.00371936	EMX2OS	196047
1.5859	-2.65053	0.00020621	0.00375759	SLC26A10	65012
1.60918	-3.015	0.000216537	0.00390253	HTR1D	3352
1.8398	-2.90694	0.000218147	0.00391878	ANO3	63982
2.29996	-2.44021	0.000220183	0.0039518	CDH7	1005
2.68409	0.474299	0.000224179	0.00400909	EMX2	2018
1.83126	-2.80058	0.000229627	0.00405919	FAM162B	221303
1.66649	-3.27449	0.000248199	0.00424439	OR10J5	127385
3.3446	-2.29862	0.000248405	0.00424439	KC6	641516
1.971	-3.12567	0.000257462	0.00436919	RP1	6101
2.02776	-3.16758	0.000260454	0.00440496	TGM7	116179
1.78776	-3.23528	0.000261551	0.00441602	GOLGA6C	653641
2.09552	-1.02374	0.000263353	0.00444269	PRG3	10394
2.63004	-2.63047	0.000271194	0.00452519	ONECUT1	3175
1.79548	-1.85612	0.00027172	0.00453017	L1TD1	54596
2.1272	-2.7378	0.000287485	0.00471852	LHCGR	3973
1.91869	-2.55135	0.000288598	0.00472855	EMILIN3	90187
1.75531	-3.27278	0.000301818	0.00489687	NOL4	8715
2.19731	-3.13243	0.00030501	0.00494464	HOXC11	3227
2.76031	-0.892934	0.000332969	0.00530304	POU1F1	5449
2.19828	-3.17633	0.000366029	0.00570297	MUM1L1	139221
1.60013	0.848748	0.000388578	0.0059192	MEIS2	4212
2.35694	-3.05318	0.00041526	0.00618856	HOXD13	3239
2.54161	-2.80888	0.000416307	0.00619952	CLCA1	1179
1.7333	-2.53027	0.000430174	0.00636797	DMRTA1	63951
1.90711	-3.03252	0.000450971	0.00659747	CDK5R2	8941
1.76406	-2.94458	0.000454201	0.00663499	KCNJ4	3761
2.21556	3.39639	0.000457226	0.00666454	DLK1	8788
1.61348	-3.30429	0.00047257	0.00680364	NXF2	56001
2.03607	-3.14558	0.000481416	0.00689614	ZIC2	7546
2.49243	-2.50584	0.000501916	0.00712835	SLC6A2	6530
1.75714	-2.28324	0.000568466	0.007812	ESRRG	2104
1.80752	-2.23688	0.000630362	0.00846995	CD207	50489
1.55315	-1.62804	0.00065969	0.00875574	LRFN2	57497
1.68965	-2.92767	0.000694898	0.00906231	NRG3	10718
1.97898	-2.61159	0.000712965	0.00922516	POM121L2	94026
1.53448	0.0970885	0.000721681	0.00929006	MFAP2	4237
1.55667	-2.16883	0.00074545	0.00950401	CAPN13	92291
1.55385	-1.68554	0.000878999	0.0107523	NLGN4Y	22829
1.50559	-1.7998	0.000920182	0.0111608	LYPD1	116372
2.08013	-2.91355	0.000961165	0.0114902	GRIN2B	2904
1.54456	-0.0535496	0.00102643	0.0120394	TRPV4	59341
1.65283	-2.07509	0.00104582	0.0121355	FLJ37543	285668
1.80148	-3.19632	0.00108998	0.0125125	ALPPL2	251
1.55316	-3.3158	0.00111708	0.0127575	HOXC12	3228
1.55737	-1.92313	0.00112278	0.0128079	TNFSF11	8600
1.77989	-3.01204	0.00121049	0.0135602	C7orf52	375607
1.73715	-2.70025	0.00134795	0.0147197	FOXL2	668
1.54553	5.36254	0.0013701	0.0148882	DEFA1B	728358
1.57063	-3.25351	0.00159991	0.016691	TM4SF4	7104
2.4994	-0.921003	0.00160946	0.0167411	IRX6	79190
1.98713	-2.91734	0.00170467	0.0174403	NAP1L6	645996
1.89792	-1.22823	0.0017058	0.0174429	CD1B	910
1.69922	-3.08318	0.00180257	0.0181165	GRIK2	2898
1.52134	-3.04796	0.00188526	0.0187585	KCNG3	170850
1.63279	-3.09305	0.00193839	0.0190402	MT3	4504
2.00913	-2.59412	0.0019523	0.0191145	FOXI2	399823
1.59232	-0.66293	0.00205989	0.0198618	PCGF2	7703
1.74152	-3.20016	0.00206481	0.0198951	GPR111	222611
1.77825	-3.06217	0.00212669	0.0203095	IL1RAPL1	11141
1.88501	-3.07638	0.00217621	0.0206244	OR4F5	79501
1.57299	-0.771383	0.00219086	0.0206784	RSPO2	340419
1.63943	-2.85784	0.00227103	0.0211807	EPHA7	2045
1.50887	0.991936	0.00236608	0.0218508	CD1E	913
1.80126	-3.237	0.00237192	0.0218761	FAM5C	339479
1.61327	0.553799	0.0024533	0.0224708	NTRK3	4916
1.55224	-3.29605	0.0025519	0.0230992	MAGEA6	4105
2.79265	-2.00388	0.00265955	0.0238343	GABRG2	2566
1.59307	-3.23004	0.00271304	0.0241401	AKAP4	8852
1.76367	0.435438	0.00275903	0.0243753	FAM84A	151354
1.57592	-3.22977	0.00286601	0.0250078	PMCHL2	5370
1.72599	-3.26212	0.00297633	0.0257222	KRT19	3880
1.88747	-0.0397238	0.0029905	0.0257807	OLAH	55301
2.61611	-2.5241	0.00326993	0.027419	MAGEA1	4100
2.05345	0.604132	0.00338675	0.0281383	ADCYAP1	116
1.67072	-3.09039	0.00339632	0.028206	RXFP3	51289
1.61379	-2.88792	0.0035483	0.028978	MLPH	79083
1.668	-3.18532	0.00357313	0.0290809	CCL7	6354
1.65506	-3.05088	0.00368964	0.0297363	MMP27	64066
1.82267	-2.65115	0.0037253	0.0299285	LRRC3B	116135
1.91179	-3.05146	0.00438366	0.033697	KCNV1	27012
2.27533	-2.38468	0.00441642	0.0338733	STATH	6779
1.85437	-3.17536	0.00480574	0.0359439	?	553137
1.95159	-1.34817	0.00503829	0.0371125	HTR1B	3351
1.58774	-3.27406	0.00535747	0.0385996	OR52E8	390079
1.62838	-2.42177	0.00546913	0.0392141	OR3A4	390756
1.54643	-3.26554	0.00573844	0.0405364	LHX9	56956
1.81809	-2.01838	0.00626353	0.0429192	KRT5	3852
1.57794	-2.54396	0.00643705	0.0438369	RPS6KA6	27330
1.59956	-1.20888	0.00712833	0.0470503	LOC643763	643763
1.75719	-3.06913	0.00759801	0.0490598	CDH8	1006

## Sheet: Negatively correlated
logFC	logCPM	PValue	FDR	gene	ID
-5.43008	4.44796	4.00754e-24	3.99552e-20	TKTL1	8277
-2.82122	-0.463149	5.42052e-14	1.54407e-10	C4orf49	84709
-3.112	2.31891	2.66332e-11	2.04256e-08	CLSTN2	64084
-4.26351	0.977634	5.27831e-11	3.62929e-08	PRSS3	5646
-2.74734	-0.331642	1.06105e-10	6.41132e-08	PRSS1	5644
-3.42592	0.59522	1.87452e-10	9.65736e-08	DNAH2	146754
-5.05956	0.613733	4.16e-10	1.7649e-07	TRY6	154754
-5.87934	-0.633818	6.65316e-10	2.41207e-07	COL20A1	57642
-1.56967	1.61539	1.05413e-09	3.4458e-07	TNK1	8711
-5.55468	-0.703811	1.1896e-09	3.76519e-07	PAX2	5076
-5.08319	-0.195203	1.54165e-09	4.65765e-07	KCNN2	3781
-2.01981	5.14715	1.69632e-09	4.90213e-07	CRHBP	1393
-6.28129	0.482997	2.39339e-09	5.89187e-07	FAM163A	148753
-3.58919	0.517975	2.95518e-09	7.18614e-07	COL11A1	1301
-3.5941	0.293636	3.35192e-09	7.86322e-07	EPHA3	2042
-6.22092	-0.983125	5.42479e-09	1.17576e-06	HMX2	3167
-2.10391	-1.06468	9.45235e-09	1.8848e-06	GPR25	2848
-2.38719	-1.02552	1.16471e-08	2.19097e-06	PNLDC1	154197
-2.27146	4.53884	1.60112e-08	2.85056e-06	SPON1	10418
-5.73683	-1.0511	2.16947e-08	3.75798e-06	HMX3	340784
-2.79899	1.15656	2.30694e-08	3.89833e-06	PTGIS	5740
-2.0327	-0.889272	2.65163e-08	4.22988e-06	LOC285954	285954
-3.13194	-0.647785	4.52483e-08	6.30944e-06	PDE10A	10846
-4.79997	-2.13645	5.36412e-08	7.18043e-06	DBX2	440097
-2.16155	0.601902	5.47355e-08	7.18043e-06	CLNK	116449
-2.02785	0.406279	5.68538e-08	7.35525e-06	SPAG17	200162
-2.71358	-1.90905	8.44195e-08	1.01405e-05	CACNA1B	774
-2.9096	-0.268563	1.21897e-07	1.35138e-05	NKAIN1	79570
-2.17166	-0.50514	1.22997e-07	1.35138e-05	SEMA3D	223117
-1.55469	3.60073	1.75216e-07	1.76455e-05	WHAMML2	440253
-2.21058	0.143367	1.98559e-07	1.9493e-05	DNAJC5B	85479
-1.69399	0.537612	2.72106e-07	2.53541e-05	ADAMTS4	9507
-2.52967	0.143131	3.68698e-07	3.1553e-05	LOC100131551	100131551
-4.389	-2.58992	4.23218e-07	3.48718e-05	NDST4	64579
-3.16635	-0.413782	4.52235e-07	3.68064e-05	PENK	5179
-3.47717	-1.09538	4.61241e-07	3.73868e-05	WDR72	256764
-2.82594	1.65755	5.72513e-07	4.35722e-05	JPH1	56704
-3.1729	-0.569883	6.204e-07	4.59881e-05	GABRA2	2555
-1.50907	3.43048	8.6312e-07	5.89405e-05	IL2RA	3559
-3.66163	-2.86117	9.12867e-07	6.13852e-05	CXorf64	100130613
-2.45589	1.62282	9.78796e-07	6.51984e-05	OTOF	9381
-2.51144	-1.02866	1.06003e-06	6.93015e-05	COL21A1	81578
-1.58768	2.51044	1.35798e-06	8.40937e-05	TNFRSF4	7293
-2.11197	-0.995289	1.64317e-06	9.79601e-05	CCDC144NL	339184
-2.53981	0.28505	1.69836e-06	0.000100491	HBE1	3046
-2.42783	0.655226	1.97372e-06	0.000112125	OGDHL	55753
-3.66368	-2.4518	2.06598e-06	0.000116044	NKX2-5	1482
-2.40246	-1.69711	2.18994e-06	0.000121298	HRC	3270
-4.7764	-2.42494	3.35002e-06	0.000164126	GSX1	219409
-1.92512	-1.17281	3.47413e-06	0.000167169	ADAM23	8745
-3.46115	-1.86946	4.04247e-06	0.000188775	SLC30A8	169026
-1.75395	-2.21173	5.3689e-06	0.000239499	C10orf129	142827
-2.92704	-2.38958	5.96403e-06	0.000260796	PSORS1C2	170680
-2.34367	2.69879	5.97926e-06	0.000260889	KIAA0087	9808
-2.20179	-0.00299009	6.04482e-06	0.000263174	SHOX2	6474
-2.23529	-2.18088	6.16525e-06	0.00026725	CARD17	440068
-2.57091	-1.61475	6.79353e-06	0.000288219	C21orf29	54084
-3.49995	-1.49405	6.83075e-06	0.000289183	SLC17A2	10246
-1.81865	-0.214705	7.19267e-06	0.000299419	SLC12A3	6559
-3.92295	-2.19786	9.97148e-06	0.000383417	GABRA1	2554
-3.81852	-2.17433	1.01656e-05	0.000386835	SOX11	6664
-3.08666	-0.39059	1.05308e-05	0.00039176	GAB4	128954
-3.91699	-2.31837	1.13141e-05	0.00041395	NOS1	4842
-2.35067	-1.23974	1.23363e-05	0.000437698	ZSCAN4	201516
-2.96588	-0.194406	1.37118e-05	0.000479674	ATRNL1	26033
-2.13246	-0.837502	2.08933e-05	0.000682973	THSD4	79875
-2.35993	1.22703	2.17108e-05	0.000701641	UNC5C	8633
-2.85549	-3.0986	2.22241e-05	0.000715912	TCF23	150921
-3.5871	-2.11707	2.31558e-05	0.000738762	BBOX1	8424
-2.25138	-1.99583	2.64659e-05	0.000811893	MYH14	79784
-1.62918	-0.36505	2.90797e-05	0.00088123	HIST3H2A	92815
-1.91146	-1.6261	3.14427e-05	0.000926098	C19orf33	64073
-1.92652	0.621442	3.40124e-05	0.00098291	KAL1	3730
-1.98001	1.93434	3.61317e-05	0.00103219	SCN2A	6326
-1.80012	-3.28629	4.14601e-05	0.00114345	OCM2	4951
-2.46682	-1.62117	4.33027e-05	0.0011812	CYP2C18	1562
-3.00038	-2.6922	4.44732e-05	0.00120162	HMSD	284293
-2.29919	4.74028	4.56489e-05	0.00122344	C20orf103	24141
-3.12317	-2.94159	4.84572e-05	0.00128489	CFTR	1080
-3.91795	-2.58886	5.21478e-05	0.00135748	CDH18	1016
-1.52691	-2.82284	6.25559e-05	0.00156901	SNORA40	677822
-1.50549	-1.21425	6.38331e-05	0.00158887	CDRT1	374286
-2.55217	-3.06088	7.00565e-05	0.00170357	PAK7	57144
-2.58119	-1.33402	7.43794e-05	0.0017869	UGT2A1	10941
-2.71121	-2.6758	7.77232e-05	0.00183303	KLK13	26085
-1.90772	-1.19122	7.88657e-05	0.00185446	CXorf22	170063
-2.82091	-0.817801	8.49854e-05	0.00196237	BIRC7	79444
-2.49773	-0.243331	8.70285e-05	0.00198244	LSAMP	4045
-1.82006	-2.90536	9.35971e-05	0.00208441	GOLGA8E	390535
-1.77635	1.992	9.53277e-05	0.00211204	SDC2	6383
-2.6239	-0.304789	9.98219e-05	0.00217911	C2CD4B	388125
-3.11881	-2.08833	0.000107433	0.00230842	B3GALT5	10317
-1.79633	2.83606	0.000111798	0.00238678	S100A16	140576
-3.16388	0.502053	0.000120637	0.00252414	PCDH10	57575
-1.59743	3.83663	0.000126694	0.0026071	SCN3A	6328
-1.73932	0.799122	0.000130316	0.00266448	AGT	183
-2.51716	-2.60873	0.0001747	0.00333445	OPCML	4978
-2.02131	-1.87802	0.000185894	0.00348436	STOML3	161003
-3.02045	-0.627103	0.000187022	0.00350161	NKX3-2	579
-2.43782	-2.49105	0.000193231	0.00358755	CACNG8	59283
-2.27615	-2.82992	0.000213255	0.00385173	CEACAM16	388551
-2.55962	1.08256	0.000232413	0.00407501	RYR2	6262
-1.65368	4.36085	0.000232534	0.00407501	KCNE1L	23630
-2.11891	-0.0350338	0.000241802	0.00418536	SLC13A5	284111
-1.61282	-1.90879	0.000254844	0.00433214	PTPRR	5801
-1.86817	-1.10687	0.000293089	0.00479425	FAM71A	149647
-1.64628	1.27448	0.000319614	0.0051396	GJA3	2700
-1.88264	-2.61143	0.000329732	0.00526832	DOK5	55816
-1.76016	-3.02919	0.000341716	0.0054207	IGFBPL1	347252
-1.53093	-2.89067	0.000353373	0.00557016	C20orf123	128506
-1.65069	-3.20457	0.000354679	0.00558193	C2orf70	339778
-2.19269	0.456772	0.000392489	0.00596967	C11orf41	25758
-2.18046	-1.2144	0.000401571	0.00602962	PRL	5617
-1.70715	-2.11376	0.00041424	0.00618224	C15orf54	400360
-1.9298	-2.36236	0.000469578	0.00678998	UGT3A1	133688
-1.96565	-2.84948	0.000592057	0.00809158	CCDC60	160777
-1.84398	2.5688	0.000654046	0.00871187	TACSTD2	4070
-1.56593	0.752022	0.000671035	0.00886122	MYO16	23026
-1.94165	-2.79456	0.000684111	0.00898037	ARSI	340075
-1.79951	-3.05612	0.000815401	0.0101938	C12orf56	115749
-1.55969	-1.06798	0.00087998	0.0107523	GRID1	2894
-1.97685	-3.2215	0.000902982	0.0109856	IL3	3562
-1.52156	-0.222173	0.000969984	0.011561	CYB5R2	51700
-1.51973	0.459909	0.000977534	0.0116301	AVPR1A	552
-2.08094	-1.9349	0.00098334	0.011665	AZGP1	563
-1.80458	-2.93418	0.00105383	0.0121888	SLITRK1	114798
-1.89577	-3.24317	0.00109978	0.0125981	ADCY8	114
-1.85242	1.43212	0.00122136	0.0136513	PREX2	80243
-2.10377	-3.1408	0.00123901	0.0137685	C21orf88	114041
-1.84089	-2.48359	0.00131066	0.0143997	DGKI	9162
-1.53072	-1.07429	0.00138489	0.0150102	KIF1A	547
-1.57253	-3.29754	0.00142018	0.0152825	GPR50	9248
-1.71977	0.578479	0.00173864	0.0177088	CCL1	6346
-2.27758	-0.360435	0.00191414	0.018895	IGSF1	3547
-1.54305	-0.380934	0.00193505	0.0190355	HBBP1	3044
-1.6808	2.09734	0.00208544	0.0200018	GLI2	2736
-1.87409	-3.11038	0.00216218	0.0205402	CHAT	1103
-2.42094	-2.51099	0.00218435	0.0206622	KIAA1210	57481
-1.95457	-1.83965	0.00219052	0.0206784	REN	5972
-2.10956	-2.0753	0.00219079	0.0206784	FLJ16779	100192386
-1.6033	-0.572333	0.00259554	0.0234186	C3orf14	57415
-1.57587	2.32659	0.0026226	0.0235774	PHACTR3	116154
-2.18432	-0.869879	0.00272609	0.024196	TRDN	10345
-2.65319	-2.35033	0.00288355	0.0250974	RBMY1A1	5940
-1.7646	-1.74514	0.00289403	0.0251665	CYP2C9	1559
-1.86478	-2.08183	0.00314702	0.0267826	TRPC4	7223
-2.62256	2.00589	0.00315423	0.0268079	XAGE1D	9503
-2.85716	-0.844728	0.00321749	0.0271276	CT45A6	541465
-1.7036	-2.62487	0.00342964	0.0283882	PCSK2	5126
-1.63574	-3.27383	0.00384596	0.0306509	HEATR7B2	133558
-1.62958	-2.13206	0.00385015	0.0306655	CXorf59	286464
-1.88145	-1.8309	0.00441678	0.0338733	CYP2C19	1557
-1.77179	-3.09455	0.00460875	0.0347969	POU4F2	5458
-1.72077	-3.02638	0.00464667	0.0349904	FGF6	2251
-1.77316	-1.53305	0.00491809	0.0365519	ANKFN1	162282
-2.22146	-3.03842	0.00501603	0.0370103	PIWIL1	9271
-1.54228	-2.38857	0.00531405	0.0384371	MSX2	4488
-1.67242	-2.54881	0.00616242	0.0424745	KCNJ3	3760
-1.64972	1.36178	0.00620888	0.0426583	PITX1	5307
-1.69569	-2.69408	0.00635236	0.0434234	SLCO1B3	28234
-1.64391	-2.3038	0.00647644	0.0439851	SEL1L2	80343
-1.73685	-0.812334	0.00714465	0.0471112	DKK1	22943
-2.04559	-2.87515	0.00737933	0.0480548	RNASE12	493901
