# Supplementary material for: Expression and prognosis analysis of TET family in acute myeloid leukemia
Source: Aging (Albany NY). 2020 Mar 25;12(6):5031–47. doi: 10.18632/aging.102928 (PMC7138570; doi:10.18632/aging.102928)
Supplement: Supplementary Table 3 [file aging-12-102928-s001..xlsx]

## Sheet: Positively correlated
Supplementary Table 3. Different expressed genes of microRNA for TET3high and TET3low.
logFC	logCPM	PValue	FDR	gene
2.31013	3.21457	2.39879e-06	0.000670463	hsa-mir-196a-2
3.44785	5.33831	0.000550922	0.0384957	hsa-mir-1269

## Sheet: Negatively correlated
logFC	logCPM	PValue	FDR	gene
-2.74174	2.31443	3.97769e-07	0.000222353	hsa-mir-1247
-2.49647	1.92488	1.03426e-05	0.00192717	hsa-mir-205
-1.64937	3.15784	0.000222181	0.0206999	hsa-mir-935
