# Supplementary material for: Expression and prognosis analysis of TET family in acute myeloid leukemia
Source: Aging (Albany NY). 2020 Mar 25;12(6):5031–47. doi: 10.18632/aging.102928 (PMC7138570; doi:10.18632/aging.102928)
Supplement: Supplementary Table 4 [file aging-12-102928-s002..xlsx]

## Sheet: Sheet1
Supplementary Table 4. Venn results of microRNAs targeting TET3.
Names	total	elements
DIANA TargetScan miRDB miRWalk mirDIP	107	hsa-miR-515-5p
		hsa-miR-2110
		hsa-miR-4659a-3p
		hsa-miR-3691-5p
		hsa-miR-3619-5p
		hsa-miR-302e
		hsa-miR-3689a-5p
		hsa-miR-106a-3p
		hsa-miR-30a-3p
		hsa-miR-20b-5p
		hsa-miR-548t-3p
		hsa-miR-106a-5p
		hsa-miR-154-5p
		hsa-miR-23b-3p
		hsa-miR-139-5p
		hsa-miR-548ag
		hsa-miR-144-3p
		hsa-miR-3616-3p
		hsa-miR-4311
		hsa-miR-3689e
		hsa-miR-6835-3p
		hsa-miR-200a-3p
		hsa-miR-548ac
		hsa-miR-4694-3p
		hsa-miR-502-3p
		hsa-miR-3619-3p
		hsa-miR-374a-5p
		hsa-miR-29b-2-5p
		hsa-miR-548x-5p
		hsa-miR-616-5p
		hsa-miR-4458
		hsa-miR-1304-5p
		hsa-miR-6129
		hsa-miR-29b-3p
		hsa-miR-5011-5p
		hsa-miR-520g-3p
		hsa-miR-2115-3p
		hsa-miR-767-3p
		hsa-miR-588
		hsa-miR-3664-3p
		hsa-miR-150-5p
		hsa-miR-361-3p
		hsa-miR-6133
		hsa-miR-711
		hsa-miR-26a-5p
		hsa-let-7a-5p
		hsa-miR-629-3p
		hsa-miR-5010-3p
		hsa-miR-4516
		hsa-miR-501-3p
		hsa-miR-520f-3p
		hsa-miR-17-5p
		hsa-miR-302b-3p
		hsa-miR-5682
		hsa-miR-6878-5p
		hsa-miR-4731-5p
		hsa-miR-769-5p
		hsa-miR-19a-3p
		hsa-miR-19b-3p
		hsa-miR-4739
		hsa-miR-582-5p
		hsa-miR-4725-3p
		hsa-miR-26b-5p
		hsa-miR-149-3p
		hsa-miR-20a-5p
		hsa-miR-301a-3p
		hsa-miR-361-5p
		hsa-miR-520c-3p
		hsa-miR-548aa
		hsa-miR-516b-3p
		hsa-miR-548e-5p
		hsa-miR-4667-5p
		hsa-miR-4756-5p
		hsa-miR-29c-3p
		hsa-let-7f-5p
		hsa-let-7d-5p
		hsa-miR-3689f
		hsa-miR-767-5p
		hsa-miR-27a-3p
		hsa-miR-3689b-5p
		hsa-miR-373-3p
		hsa-miR-3163
		hsa-miR-3662
		hsa-miR-6130
		hsa-miR-526b-3p
		hsa-miR-3976
		hsa-miR-4753-3p
		hsa-miR-548aj-5p
		hsa-miR-524-5p
		hsa-miR-337-3p
		hsa-miR-4796-3p
		hsa-miR-129-2-3p
		hsa-miR-29a-3p
		hsa-miR-374b-5p
		hsa-miR-4786-3p
		hsa-miR-4271
		hsa-miR-548aw
		hsa-miR-620
		hsa-miR-6127
		hsa-miR-4510
		hsa-let-7f-1-3p
		hsa-miR-130b-3p
		hsa-miR-374c-5p
		hsa-miR-454-3p
		hsa-miR-1226-5p
		hsa-miR-27b-3p
		hsa-miR-548g-5p
TargetScan miRDB miRWalk mirDIP	10	hsa-miR-486-5p
		hsa-miR-214-3p
		hsa-miR-3187-3p
		hsa-miR-2278
		hsa-miR-129-1-3p
		hsa-miR-324-5p
		hsa-miR-670-5p
		hsa-miR-3124-3p
		hsa-miR-4275
		hsa-miR-922
DIANA TargetScan miRDB mirDIP	91	hsa-miR-665
		hsa-miR-381-3p
		hsa-miR-1306-5p
		hsa-miR-23a-3p
		hsa-let-7a-3p
		hsa-miR-532-3p
		hsa-miR-330-3p
		hsa-miR-885-5p
		hsa-miR-372-3p
		hsa-let-7b-5p
		hsa-miR-623
		hsa-miR-593-5p
		hsa-miR-4282
		hsa-miR-548h-3p
		hsa-miR-3119
		hsa-miR-106b-5p
		hsa-let-7g-5p
		hsa-miR-5697
		hsa-miR-449b-3p
		hsa-miR-98-3p
		hsa-miR-302a-3p
		hsa-miR-148b-5p
		hsa-miR-548ap-3p
		hsa-miR-3194-3p
		hsa-miR-1321
		hsa-miR-4700-5p
		hsa-miR-520h
		hsa-miR-4713-5p
		hsa-miR-141-3p
		hsa-miR-6785-5p
		hsa-miR-93-5p
		hsa-miR-548x-3p
		hsa-miR-570-5p
		hsa-miR-542-3p
		hsa-miR-548o-3p
		hsa-miR-520a-3p
		hsa-miR-3065-3p
		hsa-miR-4659b-3p
		hsa-miR-4422
		hsa-miR-1297
		hsa-miR-4427
		hsa-miR-605-5p
		hsa-miR-301b-3p
		hsa-miR-4776-5p
		hsa-miR-4500
		hsa-miR-548c-3p
		hsa-miR-3666
		hsa-miR-579-3p
		hsa-miR-548ai
		hsa-miR-302d-3p
		hsa-miR-4465
		hsa-miR-4302
		hsa-miR-6883-5p
		hsa-let-7b-3p
		hsa-miR-548d-3p
		hsa-miR-670-3p
		hsa-miR-188-3p
		hsa-miR-4728-5p
		hsa-miR-23c
		hsa-miR-1323
		hsa-let-7i-5p
		hsa-miR-4699-3p
		hsa-miR-1270
		hsa-miR-512-3p
		hsa-miR-153-3p
		hsa-miR-3924
		hsa-miR-762
		hsa-miR-133b
		hsa-miR-548t-5p
		hsa-miR-18a-3p
		hsa-miR-4295
		hsa-miR-130a-3p
		hsa-miR-520d-5p
		hsa-miR-671-5p
		hsa-miR-513a-5p
		hsa-miR-3613-3p
		hsa-miR-655-3p
		hsa-miR-548m
		hsa-miR-548p
		hsa-miR-519d-3p
		hsa-miR-4533
		hsa-miR-3148
		hsa-miR-98-5p
		hsa-miR-545-5p
		hsa-miR-651-3p
		hsa-miR-520d-3p
		hsa-let-7e-5p
		hsa-miR-1827
		hsa-miR-548z
		hsa-let-7c-5p
		hsa-miR-300
DIANA TargetScan miRDB miRWalk	54	hsa-miR-6874-3p
		hsa-miR-95-5p
		hsa-miR-7157-5p
		hsa-miR-302c-5p
		hsa-miR-6715a-3p
		hsa-miR-6801-5p
		hsa-miR-3617-3p
		hsa-miR-4303
		hsa-miR-7106-5p
		hsa-miR-6882-3p
		hsa-miR-6826-3p
		hsa-miR-4480
		hsa-miR-6505-5p
		hsa-miR-664b-3p
		hsa-miR-6074
		hsa-miR-1305
		hsa-miR-6770-5p
		hsa-miR-4701-5p
		hsa-miR-6833-3p
		hsa-miR-3913-3p
		hsa-miR-7847-3p
		hsa-miR-3156-5p
		hsa-miR-3973
		hsa-miR-5000-3p
		hsa-miR-5583-3p
		hsa-miR-4643
		hsa-miR-4524b-3p
		hsa-miR-758-5p
		hsa-miR-138-1-3p
		hsa-miR-516a-3p
		hsa-miR-3202
		hsa-miR-4291
		hsa-miR-548az-5p
		hsa-miR-5589-5p
		hsa-miR-6854-5p
		hsa-miR-4277
		hsa-miR-5696
		hsa-miR-548bb-3p
		hsa-miR-6744-5p
		hsa-miR-3175
		hsa-miR-548f-5p
		hsa-miR-7108-3p
		hsa-miR-3667-5p
		hsa-miR-4649-3p
		hsa-miR-6871-3p
		hsa-miR-4492
		hsa-miR-6760-5p
		hsa-miR-6501-3p
		hsa-miR-6835-5p
		hsa-miR-4683
		hsa-miR-4518
		hsa-miR-6737-3p
		hsa-miR-6796-3p
		hsa-miR-548as-3p
DIANA miRDB miRWalk mirDIP	2	hsa-miR-142-3p
		hsa-miR-302c-3p
DIANA TargetScan miRWalk mirDIP	33	hsa-miR-489-3p
		hsa-miR-4525
		hsa-miR-338-5p
		hsa-miR-3658
		hsa-miR-4482-5p
		hsa-miR-423-5p
		hsa-miR-548e-3p
		hsa-miR-500a-3p
		hsa-miR-490-3p
		hsa-miR-4419a
		hsa-miR-182-3p
		hsa-miR-498
		hsa-miR-5701
		hsa-miR-520e
		hsa-miR-494-3p
		hsa-miR-130a-5p
		hsa-miR-205-3p
		hsa-miR-645
		hsa-miR-3681-5p
		hsa-miR-758-3p
		hsa-miR-513a-3p
		hsa-miR-142-5p
		hsa-miR-551b-5p
		hsa-miR-3646
		hsa-miR-425-5p
		hsa-miR-338-3p
		hsa-miR-125a-5p
		hsa-miR-5009-3p
		hsa-miR-4433a-3p
		hsa-miR-125b-5p
		hsa-miR-583
		hsa-miR-466
		hsa-miR-4423-3p
TargetScan miRDB mirDIP	14	hsa-miR-370-3p
		hsa-miR-4325
		hsa-miR-526b-5p
		hsa-miR-2115-5p
		hsa-miR-4538
		hsa-miR-3136-5p
		hsa-miR-202-3p
		hsa-miR-202-5p
		hsa-miR-766-5p
		hsa-miR-384
		hsa-miR-136-5p
		hsa-miR-432-5p
		hsa-miR-761
		hsa-miR-377-3p
TargetScan miRDB miRWalk	37	hsa-miR-3622a-5p
		hsa-miR-3120-3p
		hsa-miR-3074-5p
		hsa-miR-4436a
		hsa-miR-6807-5p
		hsa-miR-211-3p
		hsa-miR-494-5p
		hsa-miR-323b-5p
		hsa-miR-6754-5p
		hsa-miR-6867-3p
		hsa-miR-6855-3p
		hsa-miR-1266-3p
		hsa-miR-624-3p
		hsa-miR-4267
		hsa-miR-4663
		hsa-miR-7157-3p
		hsa-miR-6804-3p
		hsa-miR-676-5p
		hsa-miR-7152-5p
		hsa-miR-30d-3p
		hsa-miR-4453
		hsa-miR-4687-5p
		hsa-miR-4668-5p
		hsa-miR-4513
		hsa-miR-4804-3p
		hsa-miR-4316
		hsa-miR-410-5p
		hsa-miR-6829-5p
		hsa-miR-7702
		hsa-miR-493-3p
		hsa-miR-345-3p
		hsa-miR-4445-5p
		hsa-miR-3667-3p
		hsa-miR-7843-3p
		hsa-miR-5580-3p
		hsa-miR-7160-5p
		hsa-miR-4800-5p
DIANA TargetScan miRDB	43	hsa-miR-6780b-5p
		hsa-miR-4477a
		hsa-miR-4777-5p
		hsa-miR-6751-5p
		hsa-miR-6765-3p
		hsa-miR-6887-3p
		hsa-miR-519e-5p
		hsa-miR-2277-3p
		hsa-miR-548ae-3p
		hsa-miR-6857-3p
		hsa-miR-4778-3p
		hsa-miR-4498
		hsa-miR-6079
		hsa-miR-4272
		hsa-miR-548aq-3p
		hsa-miR-335-3p
		hsa-miR-3934-3p
		hsa-miR-1266-5p
		hsa-miR-3974
		hsa-miR-7844-5p
		hsa-miR-7162-5p
		hsa-miR-513b-5p
		hsa-miR-548ba
		hsa-miR-503-3p
		hsa-miR-4666a-5p
		hsa-miR-4310
		hsa-miR-190a-3p
		hsa-miR-8089
		hsa-miR-548ah-3p
		hsa-miR-153-5p
		hsa-miR-1205
		hsa-miR-548aj-3p
		hsa-miR-3127-5p
		hsa-miR-4520-2-3p
		hsa-miR-6512-5p
		hsa-miR-6780b-3p
		hsa-miR-3190-3p
		hsa-miR-8068
		hsa-miR-6803-5p
		hsa-miR-548j-3p
		hsa-miR-6834-5p
		hsa-miR-548am-3p
		hsa-miR-7162-3p
DIANA miRDB mirDIP	3	hsa-miR-133a-3p
		hsa-miR-101-3p
		hsa-miR-140-3p
TargetScan miRWalk mirDIP	44	hsa-miR-30a-5p
		hsa-miR-586
		hsa-miR-491-5p
		hsa-miR-3161
		hsa-miR-33a-5p
		hsa-miR-541-3p
		hsa-miR-554
		hsa-miR-30b-5p
		hsa-miR-193b-3p
		hsa-miR-24-3p
		hsa-miR-3934-5p
		hsa-miR-138-5p
		hsa-miR-548n
		hsa-miR-3942-5p
		hsa-miR-484
		hsa-miR-193a-3p
		hsa-miR-940
		hsa-let-7f-2-3p
		hsa-miR-105-5p
		hsa-miR-382-5p
		hsa-miR-204-5p
		hsa-miR-544a
		hsa-miR-3177-3p
		hsa-miR-30d-5p
		hsa-miR-196b-3p
		hsa-miR-765
		hsa-miR-143-3p
		hsa-miR-15b-5p
		hsa-miR-6838-5p
		hsa-miR-342-5p
		hsa-miR-30e-5p
		hsa-miR-654-5p
		hsa-miR-130b-5p
		hsa-miR-539-5p
		hsa-miR-33b-5p
		hsa-miR-888-5p
		hsa-miR-497-5p
		hsa-miR-30c-5p
		hsa-miR-502-5p
		hsa-miR-93-3p
		hsa-miR-195-5p
		hsa-miR-299-3p
		hsa-miR-578
		hsa-miR-191-5p
DIANA TargetScan mirDIP	30	hsa-miR-518a-5p
		hsa-miR-488-5p
		hsa-miR-527
		hsa-miR-374a-3p
		hsa-miR-135a-5p
		hsa-miR-373-5p
		hsa-miR-891b
		hsa-miR-650
		hsa-miR-4531
		hsa-miR-606
		hsa-miR-607
		hsa-miR-488-3p
		hsa-miR-577
		hsa-miR-495-3p
		hsa-miR-5582-3p
		hsa-miR-613
		hsa-miR-520b
		hsa-miR-1-3p
		hsa-miR-1914-3p
		hsa-miR-548u
		hsa-miR-1252-5p
		hsa-miR-206
		hsa-miR-369-3p
		hsa-miR-522-3p
		hsa-miR-548f-3p
		hsa-miR-4760-3p
		hsa-miR-371b-5p
		hsa-miR-135b-5p
		hsa-miR-548a-3p
		hsa-miR-4319
DIANA TargetScan miRWalk	77	hsa-miR-6738-5p
		hsa-miR-4747-5p
		hsa-miR-6771-3p
		hsa-miR-4793-3p
		hsa-miR-6797-5p
		hsa-miR-329-5p
		hsa-miR-5680
		hsa-miR-6805-3p
		hsa-miR-5692c
		hsa-miR-3126-5p
		hsa-miR-4698
		hsa-miR-139-3p
		hsa-miR-4261
		hsa-miR-4476
		hsa-miR-3936
		hsa-miR-6870-5p
		hsa-miR-6734-5p
		hsa-miR-1252-3p
		hsa-miR-3179
		hsa-miR-889-5p
		hsa-miR-7-1-3p
		hsa-miR-5194
		hsa-miR-587
		hsa-miR-8087
		hsa-miR-1249-5p
		hsa-miR-1273h-3p
		hsa-miR-6848-5p
		hsa-miR-4522
		hsa-miR-6847-5p
		hsa-miR-585-5p
		hsa-miR-4648
		hsa-miR-7109-5p
		hsa-miR-499a-3p
		hsa-miR-4475
		hsa-miR-1910-3p
		hsa-miR-5582-5p
		hsa-miR-6124
		hsa-miR-6887-5p
		hsa-miR-5692a
		hsa-miR-6511a-5p
		hsa-miR-1267
		hsa-miR-4748
		hsa-miR-6833-5p
		hsa-miR-302a-5p
		hsa-miR-7155-5p
		hsa-miR-3074-3p
		hsa-miR-3591-3p
		hsa-miR-4432
		hsa-miR-6859-3p
		hsa-miR-656-3p
		hsa-miR-4496
		hsa-miR-3158-5p
		hsa-miR-7111-5p
		hsa-miR-7161-5p
		hsa-miR-3121-5p
		hsa-miR-7850-5p
		hsa-miR-5698
		hsa-miR-7-2-3p
		hsa-miR-4789-3p
		hsa-miR-3173-3p
		hsa-miR-1911-3p
		hsa-miR-195-3p
		hsa-miR-4470
		hsa-miR-4762-3p
		hsa-miR-3184-5p
		hsa-miR-5187-3p
		hsa-miR-4464
		hsa-miR-6747-5p
		hsa-miR-3609
		hsa-miR-7975
		hsa-miR-16-2-3p
		hsa-miR-6507-5p
		hsa-miR-4658
		hsa-miR-7845-5p
		hsa-miR-513c-3p
		hsa-miR-889-3p
		hsa-miR-4723-5p
DIANA miRWalk mirDIP	1	hsa-miR-506-3p
TargetScan miRDB	41	hsa-miR-5001-5p
		hsa-miR-6787-3p
		hsa-miR-1207-5p
		hsa-miR-4312
		hsa-miR-4678
		hsa-miR-3621
		hsa-miR-6779-3p
		hsa-miR-6795-3p
		hsa-miR-5195-5p
		hsa-miR-5580-5p
		hsa-miR-2053
		hsa-miR-4768-5p
		hsa-miR-4441
		hsa-miR-6875-3p
		hsa-miR-30e-3p
		hsa-miR-452-3p
		hsa-miR-4755-3p
		hsa-miR-6728-3p
		hsa-miR-8083
		hsa-miR-5693
		hsa-miR-1179
		hsa-miR-4720-3p
		hsa-miR-2355-3p
		hsa-miR-6073
		hsa-miR-4270
		hsa-miR-144-5p
		hsa-miR-3679-3p
		hsa-miR-6809-3p
		hsa-miR-2116-3p
		hsa-miR-4439
		hsa-miR-1825
		hsa-miR-6893-3p
		hsa-miR-3685
		hsa-miR-4763-3p
		hsa-miR-3663-3p
		hsa-miR-4529-3p
		hsa-miR-4468
		hsa-miR-519d-5p
		hsa-miR-4447
		hsa-miR-6832-3p
		hsa-miR-1245b-3p
miRDB mirDIP	1	hsa-miR-183-5p
miRDB miRWalk	1	hsa-miR-599
TargetScan mirDIP	44	hsa-miR-766-3p
		hsa-miR-603
		hsa-miR-621
		hsa-miR-644a
		hsa-miR-548v
		hsa-miR-635
		hsa-miR-1226-3p
		hsa-miR-567
		hsa-miR-5010-5p
		hsa-miR-515-3p
		hsa-miR-22-3p
		hsa-miR-3607-3p
		hsa-miR-892b
		hsa-miR-519e-3p
		hsa-miR-324-3p
		hsa-miR-149-5p
		hsa-miR-5703
		hsa-miR-580-3p
		hsa-miR-548b-3p
		hsa-miR-137
		hsa-miR-197-3p
		hsa-miR-433-3p
		hsa-miR-637
		hsa-miR-562
		hsa-miR-205-5p
		hsa-miR-653-5p
		hsa-miR-223-3p
		hsa-miR-584-5p
		hsa-miR-298
		hsa-miR-549a
		hsa-miR-590-3p
		hsa-miR-4263
		hsa-miR-654-3p
		hsa-miR-146b-5p
		hsa-miR-939-5p
		hsa-miR-625-5p
		hsa-miR-3196
		hsa-miR-129-5p
		hsa-miR-182-5p
		hsa-miR-15a-5p
		hsa-miR-802
		hsa-miR-671-3p
		hsa-miR-424-5p
		hsa-miR-16-5p
TargetScan miRWalk	365	hsa-miR-557
		hsa-miR-548s
		hsa-miR-6891-5p
		hsa-miR-3682-5p
		hsa-miR-3155a
		hsa-miR-6740-5p
		hsa-miR-450a-2-3p
		hsa-miR-3622a-3p
		hsa-miR-6793-3p
		hsa-miR-2276-3p
		hsa-miR-4769-5p
		hsa-miR-146a-5p
		hsa-miR-8485
		hsa-miR-4488
		hsa-miR-6813-3p
		hsa-miR-4797-3p
		hsa-miR-4463
		hsa-miR-575
		hsa-miR-5705
		hsa-miR-486-3p
		hsa-miR-7113-5p
		hsa-miR-4257
		hsa-miR-6766-3p
		hsa-miR-4710
		hsa-miR-6841-3p
		hsa-miR-574-3p
		hsa-miR-8071
		hsa-miR-23a-5p
		hsa-miR-3192-3p
		hsa-miR-6856-3p
		hsa-miR-302b-5p
		hsa-miR-875-3p
		hsa-miR-136-3p
		hsa-miR-4664-5p
		hsa-miR-3692-3p
		hsa-miR-5579-5p
		hsa-miR-548al
		hsa-miR-4685-3p
		hsa-miR-641
		hsa-miR-3153
		hsa-miR-5006-5p
		hsa-miR-6733-3p
		hsa-miR-4297
		hsa-miR-4457
		hsa-miR-2682-3p
		hsa-miR-1255b-5p
		hsa-miR-4645-5p
		hsa-miR-4511
		hsa-miR-6846-5p
		hsa-miR-3661
		hsa-miR-1291
		hsa-miR-495-5p
		hsa-miR-4759
		hsa-miR-643
		hsa-miR-4676-3p
		hsa-miR-3169
		hsa-miR-4735-5p
		hsa-miR-4756-3p
		hsa-miR-3162-5p
		hsa-miR-4650-5p
		hsa-miR-4665-5p
		hsa-miR-4299
		hsa-miR-3972
		hsa-miR-6825-3p
		hsa-miR-3138
		hsa-miR-2681-3p
		hsa-miR-3684
		hsa-miR-3191-3p
		hsa-miR-5047
		hsa-miR-4446-5p
		hsa-miR-4472
		hsa-miR-4696
		hsa-miR-7114-5p
		hsa-miR-2276-5p
		hsa-miR-4514
		hsa-miR-3927-5p
		hsa-miR-3922-5p
		hsa-miR-548k
		hsa-miR-518f-5p
		hsa-miR-6866-3p
		hsa-miR-4501
		hsa-miR-4772-3p
		hsa-miR-1250-3p
		hsa-miR-6734-3p
		hsa-miR-7703
		hsa-miR-6812-5p
		hsa-miR-4738-3p
		hsa-miR-3922-3p
		hsa-miR-1272
		hsa-miR-509-5p
		hsa-miR-3184-3p
		hsa-miR-1343-3p
		hsa-miR-1183
		hsa-miR-3144-5p
		hsa-let-7d-3p
		hsa-miR-3652
		hsa-miR-7854-3p
		hsa-miR-6884-3p
		hsa-miR-7154-3p
		hsa-miR-3064-5p
		hsa-miR-509-3-5p
		hsa-miR-3918
		hsa-miR-4755-5p
		hsa-miR-16-1-3p
		hsa-miR-4732-3p
		hsa-miR-6884-5p
		hsa-miR-1184
		hsa-miR-4635
		hsa-miR-561-3p
		hsa-miR-3146
		hsa-miR-6825-5p
		hsa-miR-134-5p
		hsa-miR-6733-5p
		hsa-miR-4430
		hsa-miR-3117-3p
		hsa-miR-365a-5p
		hsa-miR-6816-3p
		hsa-miR-6805-5p
		hsa-miR-659-5p
		hsa-miR-2467-5p
		hsa-miR-3679-5p
		hsa-miR-6867-5p
		hsa-miR-409-5p
		hsa-miR-508-5p
		hsa-miR-4504
		hsa-miR-193b-5p
		hsa-miR-7155-3p
		hsa-miR-4687-3p
		hsa-miR-516a-5p
		hsa-miR-6755-3p
		hsa-miR-937-3p
		hsa-miR-550b-3p
		hsa-miR-378g
		hsa-miR-29a-5p
		hsa-miR-521
		hsa-miR-3151-5p
		hsa-miR-8054
		hsa-miR-2113
		hsa-miR-5571-3p
		hsa-miR-31-3p
		hsa-miR-5681a
		hsa-miR-96-3p
		hsa-miR-4535
		hsa-miR-6831-3p
		hsa-miR-4676-5p
		hsa-miR-6771-5p
		hsa-miR-1253
		hsa-miR-4764-5p
		hsa-miR-134-3p
		hsa-miR-1185-5p
		hsa-miR-1469
		hsa-miR-5681b
		hsa-miR-1224-5p
		hsa-miR-4772-5p
		hsa-miR-3913-5p
		hsa-miR-452-5p
		hsa-miR-6753-3p
		hsa-miR-363-5p
		hsa-miR-7851-3p
		hsa-miR-6881-5p
		hsa-miR-19b-2-5p
		hsa-miR-4670-3p
		hsa-miR-6806-3p
		hsa-miR-6758-3p
		hsa-miR-4281
		hsa-miR-100-3p
		hsa-miR-3133
		hsa-miR-4298
		hsa-miR-92a-2-5p
		hsa-miR-1224-3p
		hsa-miR-2467-3p
		hsa-miR-3928-5p
		hsa-miR-5588-3p
		hsa-miR-6769a-5p
		hsa-miR-3130-3p
		hsa-miR-1264
		hsa-miR-297
		hsa-miR-4770
		hsa-miR-188-5p
		hsa-miR-4293
		hsa-miR-1249-3p
		hsa-miR-4787-3p
		hsa-miR-7973
		hsa-miR-1251-3p
		hsa-miR-4692
		hsa-miR-346
		hsa-miR-4786-5p
		hsa-miR-4780
		hsa-miR-4252
		hsa-miR-8065
		hsa-miR-4749-3p
		hsa-miR-487a-3p
		hsa-miR-548av-5p
		hsa-miR-3975
		hsa-miR-4674
		hsa-miR-8069
		hsa-miR-377-5p
		hsa-miR-8060
		hsa-miR-380-5p
		hsa-miR-19b-1-5p
		hsa-miR-34a-3p
		hsa-miR-6503-5p
		hsa-miR-210-5p
		hsa-miR-5196-5p
		hsa-miR-4761-5p
		hsa-miR-6769b-3p
		hsa-miR-7106-3p
		hsa-miR-544b
		hsa-miR-4505
		hsa-miR-4633-3p
		hsa-miR-4491
		hsa-miR-6716-3p
		hsa-miR-8055
		hsa-miR-3682-3p
		hsa-miR-6828-5p
		hsa-miR-1470
		hsa-miR-17-3p
		hsa-miR-4652-3p
		hsa-miR-196a-3p
		hsa-miR-3200-3p
		hsa-miR-4690-5p
		hsa-miR-4717-5p
		hsa-miR-605-3p
		hsa-miR-6822-3p
		hsa-miR-125b-2-3p
		hsa-miR-323b-3p
		hsa-miR-6772-5p
		hsa-miR-3912-5p
		hsa-miR-1202
		hsa-miR-6769a-3p
		hsa-miR-4654
		hsa-miR-6782-5p
		hsa-miR-4527
		hsa-miR-6864-3p
		hsa-miR-3199
		hsa-miR-6757-3p
		hsa-miR-5591-5p
		hsa-miR-708-3p
		hsa-miR-6090
		hsa-miR-584-3p
		hsa-miR-6808-5p
		hsa-miR-4280
		hsa-miR-1294
		hsa-miR-8064
		hsa-miR-676-3p
		hsa-miR-3181
		hsa-miR-873-3p
		hsa-miR-3911
		hsa-miR-3650
		hsa-miR-7152-3p
		hsa-miR-6828-3p
		hsa-miR-501-5p
		hsa-miR-642a-3p
		hsa-miR-4745-5p
		hsa-miR-1255b-2-3p
		hsa-miR-3915
		hsa-miR-6820-3p
		hsa-miR-5704
		hsa-miR-6862-5p
		hsa-miR-99a-3p
		hsa-miR-4251
		hsa-miR-4715-5p
		hsa-miR-6810-3p
		hsa-miR-1972
		hsa-miR-632
		hsa-miR-4684-3p
		hsa-miR-4289
		hsa-miR-3659
		hsa-miR-5002-3p
		hsa-miR-6738-3p
		hsa-miR-5088-3p
		hsa-miR-5004-5p
		hsa-miR-5187-5p
		hsa-miR-4646-3p
		hsa-miR-4428
		hsa-miR-5586-3p
		hsa-miR-4515
		hsa-miR-6807-3p
		hsa-miR-892c-3p
		hsa-miR-3617-5p
		hsa-miR-4540
		hsa-miR-4456
		hsa-miR-890
		hsa-miR-4669
		hsa-miR-6889-5p
		hsa-miR-642b-3p
		hsa-miR-3620-3p
		hsa-miR-3154
		hsa-miR-4520-3p
		hsa-miR-4675
		hsa-miR-629-5p
		hsa-miR-3136-3p
		hsa-miR-132-5p
		hsa-miR-4699-5p
		hsa-miR-6509-5p
		hsa-miR-6889-3p
		hsa-miR-5589-3p
		hsa-miR-506-5p
		hsa-miR-5691
		hsa-miR-6776-5p
		hsa-miR-7977
		hsa-miR-5579-3p
		hsa-miR-6852-5p
		hsa-miR-660-5p
		hsa-miR-3155b
		hsa-miR-7153-5p
		hsa-miR-151a-3p
		hsa-miR-106b-3p
		hsa-miR-5571-5p
		hsa-miR-4324
		hsa-miR-3177-5p
		hsa-miR-4779
		hsa-miR-642b-5p
		hsa-miR-302d-5p
		hsa-miR-147a
		hsa-miR-1913
		hsa-miR-4529-5p
		hsa-miR-3176
		hsa-miR-19a-5p
		hsa-miR-6769b-5p
		hsa-miR-185-3p
		hsa-miR-4738-5p
		hsa-miR-4712-3p
		hsa-miR-4652-5p
		hsa-miR-7153-3p
		hsa-miR-4773
		hsa-miR-8057
		hsa-miR-6752-5p
		hsa-miR-4792
		hsa-miR-3150b-5p
		hsa-miR-6739-5p
		hsa-miR-5189-3p
		hsa-miR-3944-3p
		hsa-miR-1255a
		hsa-miR-4660
		hsa-miR-6838-3p
		hsa-miR-4708-5p
		hsa-miR-760
		hsa-let-7c-3p
		hsa-miR-1296-3p
		hsa-miR-4724-5p
		hsa-miR-4287
		hsa-miR-631
		hsa-miR-4435
		hsa-miR-6798-3p
		hsa-miR-181a-3p
		hsa-miR-1225-5p
		hsa-miR-4288
		hsa-miR-505-5p
		hsa-miR-1283
		hsa-miR-1278
		hsa-miR-6505-3p
		hsa-miR-6849-5p
		hsa-miR-6786-5p
		hsa-miR-6888-5p
		hsa-miR-5003-5p
		hsa-miR-4775
		hsa-miR-218-2-3p
		hsa-miR-574-5p
		hsa-miR-33a-3p
		hsa-miR-4657
		hsa-miR-6752-3p
		hsa-miR-649
		hsa-miR-6846-3p
		hsa-miR-5591-3p
DIANA TargetScan	61	hsa-miR-1276
		hsa-miR-499b-3p
		hsa-miR-1277-5p
		hsa-miR-1238-5p
		hsa-miR-1273f
		hsa-miR-3606-3p
		hsa-miR-4682
		hsa-miR-4774-3p
		hsa-miR-7151-5p
		hsa-miR-6856-5p
		hsa-miR-944
		hsa-miR-6795-5p
		hsa-miR-1275
		hsa-miR-8081
		hsa-miR-3611
		hsa-miR-5590-3p
		hsa-miR-6886-3p
		hsa-miR-5688
		hsa-miR-6727-3p
		hsa-miR-6736-3p
		hsa-miR-4668-3p
		hsa-miR-6800-3p
		hsa-miR-548av-3p
		hsa-miR-548at-3p
		hsa-miR-32-3p
		hsa-miR-3914
		hsa-miR-3150a-3p
		hsa-miR-6071
		hsa-miR-548az-3p
		hsa-miR-4695-5p
		hsa-miR-4768-3p
		hsa-miR-6876-5p
		hsa-miR-548ar-3p
		hsa-miR-938
		hsa-miR-3612
		hsa-miR-4721
		hsa-miR-4758-5p
		hsa-miR-4717-3p
		hsa-miR-500b-3p
		hsa-miR-5692b
		hsa-miR-3130-5p
		hsa-miR-4524a-3p
		hsa-miR-4459
		hsa-miR-4307
		hsa-miR-4517
		hsa-miR-6134
		hsa-miR-1-5p
		hsa-miR-6763-5p
		hsa-miR-5787
		hsa-miR-1185-2-3p
		hsa-miR-548ay-3p
		hsa-miR-942-5p
		hsa-miR-6875-5p
		hsa-miR-224-3p
		hsa-miR-1468-3p
		hsa-miR-4719
		hsa-miR-4733-3p
		hsa-miR-4666a-3p
		hsa-miR-6790-5p
		hsa-miR-1909-5p
		hsa-miR-1185-1-3p
miRWalk mirDIP	14	hsa-miR-375
		hsa-miR-32-5p
		hsa-miR-31-5p
		hsa-miR-221-3p
		hsa-miR-215-5p
		hsa-miR-335-5p
		hsa-miR-7-5p
		hsa-miR-409-3p
		hsa-miR-21-5p
		hsa-miR-455-5p
		hsa-miR-3145-3p
		hsa-miR-383-5p
		hsa-miR-192-5p
		hsa-miR-203a-3p
DIANA mirDIP	5	hsa-miR-483-3p
		hsa-miR-519a-3p
		hsa-miR-410-3p
		hsa-miR-873-5p
		hsa-miR-320a
DIANA miRWalk	17	hsa-miR-320c
		hsa-miR-4484
		hsa-miR-4499
		hsa-miR-5191
		hsa-miR-320d
		hsa-miR-3121-3p
		hsa-miR-4716-3p
		hsa-miR-4793-5p
		hsa-miR-4433b-3p
		hsa-miR-5000-5p
		hsa-miR-497-3p
		hsa-miR-483-5p
		hsa-miR-340-5p
		hsa-miR-3925-5p
		hsa-miR-7151-3p
		hsa-miR-8063
		hsa-miR-4662a-3p
miRDB	12	hsa-miR-10527-5p
		hsa-miR-10394-5p
		hsa-miR-520e-3p
		hsa-miR-498-5p
		hsa-miR-9851-3p
		hsa-miR-12119
		hsa-miR-10393-3p
		hsa-miR-520b-3p
		hsa-miR-12128
		hsa-miR-9985
		hsa-miR-12117
		hsa-miR-498-3p
TargetScan	380	hsa-miR-522-5p
		hsa-miR-4743-3p
		hsa-miR-3622b-3p
		hsa-miR-4709-3p
		hsa-miR-3940-5p
		hsa-miR-563
		hsa-miR-483-3p.2
		hsa-miR-3672
		hsa-miR-3653-3p
		hsa-miR-4300
		hsa-miR-6868-3p
		hsa-miR-4763-5p
		hsa-miR-661
		hsa-miR-4722-5p
		hsa-miR-4765
		hsa-miR-5584-5p
		hsa-miR-124-3p.1
		hsa-miR-3928-3p
		hsa-miR-1301-3p
		hsa-miR-6778-5p
		hsa-miR-371b-3p
		hsa-miR-4751
		hsa-miR-3189-3p
		hsa-miR-6880-5p
		hsa-miR-657
		hsa-miR-5003-3p
		hsa-miR-371a-3p
		hsa-miR-3150a-5p
		hsa-miR-4445-3p
		hsa-miR-618
		hsa-miR-627-3p
		hsa-miR-203a-5p
		hsa-miR-92a-1-5p
		hsa-miR-183-5p.1
		hsa-miR-133a-3p.1
		hsa-miR-2392
		hsa-miR-4431
		hsa-miR-4418
		hsa-miR-6069
		hsa-miR-4276
		hsa-miR-4680-3p
		hsa-miR-216b-3p
		hsa-miR-3692-5p
		hsa-miR-6892-5p
		hsa-miR-328-3p
		hsa-miR-190b
		hsa-miR-4673
		hsa-miR-1908-5p
		hsa-miR-6893-5p
		hsa-miR-608
		hsa-miR-133a-3p.2
		hsa-miR-3615
		hsa-miR-6839-3p
		hsa-miR-4253
		hsa-miR-5096
		hsa-miR-6790-3p
		hsa-miR-5197-5p
		hsa-miR-1343-5p
		hsa-miR-1258
		hsa-miR-6775-3p
		hsa-miR-4697-5p
		hsa-miR-6726-5p
		hsa-miR-2052
		hsa-miR-4795-5p
		hsa-miR-526a
		hsa-miR-1915-5p
		hsa-miR-3945
		hsa-miR-7515
		hsa-miR-4782-3p
		hsa-miR-663b
		hsa-miR-4656
		hsa-miR-6723-5p
		hsa-miR-1587
		hsa-miR-6816-5p
		hsa-miR-764
		hsa-miR-8067
		hsa-miR-4803
		hsa-miR-892a
		hsa-miR-4530
		hsa-miR-4424
		hsa-miR-3183
		hsa-miR-3942-3p
		hsa-miR-564
		hsa-miR-876-3p
		hsa-miR-4434
		hsa-miR-29b-1-5p
		hsa-miR-1265
		hsa-miR-5694
		hsa-miR-3166
		hsa-miR-3164
		hsa-miR-514a-5p
		hsa-miR-140-3p.2
		hsa-miR-552-3p
		hsa-miR-505-3p.1
		hsa-miR-3147
		hsa-miR-3606-5p
		hsa-miR-6792-5p
		hsa-miR-3152-5p
		hsa-miR-138-2-3p
		hsa-miR-6745
		hsa-miR-1233-5p
		hsa-miR-222-5p
		hsa-miR-589-5p
		hsa-miR-181c-3p
		hsa-miR-6766-5p
		hsa-miR-5581-5p
		hsa-miR-27a-5p
		hsa-miR-942-3p
		hsa-miR-517-5p
		hsa-miR-3943
		hsa-miR-6507-3p
		hsa-miR-4640-5p
		hsa-miR-8070
		hsa-miR-4726-5p
		hsa-miR-4726-3p
		hsa-miR-127-5p
		hsa-miR-589-3p
		hsa-miR-6861-3p
		hsa-miR-7853-5p
		hsa-miR-3192-5p
		hsa-miR-597-3p
		hsa-miR-6508-5p
		hsa-miR-1238-3p
		hsa-miR-6749-5p
		hsa-miR-625-3p
		hsa-miR-4448
		hsa-miR-539-3p
		hsa-miR-217
		hsa-let-7e-3p
		hsa-miR-3180-3p
		hsa-miR-6872-3p
		hsa-miR-128-1-5p
		hsa-miR-4645-3p
		hsa-miR-219b-5p
		hsa-miR-6791-5p
		hsa-miR-4469
		hsa-miR-510-3p
		hsa-miR-4794
		hsa-miR-6806-5p
		hsa-miR-8052
		hsa-miR-432-3p
		hsa-miR-3180
		hsa-miR-6894-3p
		hsa-miR-518c-5p
		hsa-miR-4483
		hsa-miR-3657
		hsa-miR-6851-3p
		hsa-miR-570-3p
		hsa-miR-3135a
		hsa-miR-1207-3p
		hsa-miR-873-5p.2
		hsa-miR-3620-5p
		hsa-miR-3926
		hsa-miR-4688
		hsa-miR-7852-3p
		hsa-miR-208a-3p
		hsa-miR-4734
		hsa-miR-4260
		hsa-miR-6084
		hsa-miR-3158-3p
		hsa-miR-553
		hsa-miR-3616-5p
		hsa-miR-6753-5p
		hsa-miR-33b-3p
		hsa-miR-5087
		hsa-miR-6735-3p
		hsa-miR-520c-5p
		hsa-miR-6783-5p
		hsa-miR-4651
		hsa-miR-148a-5p
		hsa-miR-4781-3p
		hsa-miR-4704-3p
		hsa-miR-4749-5p
		hsa-miR-4446-3p
		hsa-miR-323a-5p
		hsa-miR-659-3p
		hsa-miR-6813-5p
		hsa-miR-6848-3p
		hsa-miR-99b-3p
		hsa-miR-6819-5p
		hsa-miR-6747-3p
		hsa-miR-190a-5p
		hsa-miR-3165
		hsa-miR-4308
		hsa-miR-3188
		hsa-miR-4771
		hsa-miR-6746-5p
		hsa-miR-6772-3p
		hsa-miR-4507
		hsa-miR-3920
		hsa-miR-3665
		hsa-miR-2355-5p
		hsa-miR-1293
		hsa-miR-518d-5p
		hsa-miR-7108-5p
		hsa-miR-6873-5p
		hsa-miR-3200-5p
		hsa-miR-3140-5p
		hsa-miR-5089-3p
		hsa-miR-4695-3p
		hsa-miR-4314
		hsa-miR-3677-3p
		hsa-miR-4641
		hsa-miR-1237-5p
		hsa-miR-4486
		hsa-miR-744-5p
		hsa-miR-3122
		hsa-miR-6765-5p
		hsa-miR-920
		hsa-miR-518e-5p
		hsa-miR-593-3p
		hsa-miR-6504-5p
		hsa-miR-5186
		hsa-miR-3173-5p
		hsa-miR-507
		hsa-miR-186-3p
		hsa-miR-6088
		hsa-miR-200a-5p
		Poorly conserved sites hsa-miR-5587-5p hsa-miR-4455 hsa-miR-9500 hsa-miR-939-3p hsa-miR-600 hsa-miR-3145-5p hsa-miR-496.2 hsa-miR-302c-3p.2 hsa-miR-6810-5p hsa-miR-4744 hsa-miR-3670 hsa-miR-5585-5p hsa-miR-302c-3p.1 hsa-miR-3194-5p hsa-miR-4706 hsa-miR-7849-3p hsa-miR-3065-5p hsa-miR-4489 hsa-miR-194-3p hsa-miR-569 hsa-miR-504-5p.1 hsa-miR-504-3p hsa-miR-573 hsa-miR-6128 hsa-miR-4790-5p hsa-miR-2…
		hsa-miR-6781-3p
		hsa-miR-651-5p
		hsa-miR-4642
		hsa-miR-6085
		hsa-miR-6730-5p
		hsa-miR-4789-5p
		hsa-miR-3663-5p
		hsa-miR-572
		hsa-miR-4632-3p
		hsa-miR-155-3p
		hsa-miR-6757-5p
		hsa-miR-6758-5p
		hsa-miR-1229-5p
		hsa-miR-3185
		hsa-miR-519a-5p
		hsa-miR-4741
		hsa-miR-6842-5p
		hsa-miR-555
		hsa-miR-4321
		hsa-miR-6799-3p
		hsa-miR-6726-3p
		hsa-miR-485-5p
		hsa-miR-485-3p
		hsa-miR-101-3p.1
		hsa-miR-211-5p
		hsa-miR-219a-5p
		hsa-miR-5572
		hsa-miR-6756-5p
		hsa-miR-6514-3p
		hsa-miR-595
		hsa-miR-3919
		hsa-miR-3649
		hsa-miR-6756-3p
		hsa-miR-490-5p
		hsa-miR-365b-5p
		hsa-miR-548ah-5p
		hsa-miR-6077
		hsa-miR-3123
		hsa-miR-4693-5p
		hsa-miR-4283
		hsa-miR-6787-5p
		hsa-miR-3118
		hsa-miR-7154-5p
		hsa-miR-663a
		hsa-miR-3140-3p
		hsa-miR-4723-3p
		hsa-miR-1273g-5p
		hsa-miR-4685-5p
		hsa-miR-6853-3p
		hsa-miR-4528
		hsa-miR-3143
		hsa-miR-483-3p.1
		hsa-miR-4747-3p
		hsa-miR-142-3p.1
		hsa-miR-5581-3p
		hsa-miR-8077
		hsa-miR-1468-5p
		hsa-miR-523-5p
		hsa-miR-6827-5p
		hsa-miR-7113-3p
		hsa-miR-1286
		hsa-miR-101-3p.2
		hsa-miR-7855-5p
		hsa-miR-619-3p
		hsa-miR-6777-5p
		hsa-miR-5093
		hsa-miR-4481
		hsa-miR-561-5p
		hsa-miR-23b-5p
		hsa-miR-545-3p
		hsa-miR-7107-3p
		hsa-miR-128-2-5p
		hsa-miR-125a-3p
		hsa-miR-6798-5p
		hsa-miR-3182
		hsa-miR-6894-5p
		hsa-miR-6737-5p
		hsa-miR-1228-5p
		hsa-miR-1206
		hsa-miR-6842-3p
		hsa-miR-7110-5p
		hsa-miR-451b
		hsa-miR-3127-3p
		hsa-miR-203b-3p
		hsa-miR-4703-5p
		hsa-miR-6843-3p
		hsa-miR-664a-5p
		hsa-miR-4279
		hsa-miR-4425
		hsa-miR-5695
		hsa-miR-1299
		hsa-miR-4729
		hsa-miR-3664-5p
		hsa-miR-5006-3p
		hsa-miR-6783-3p
		hsa-miR-6873-3p
		hsa-miR-6742-3p
		hsa-miR-519b-5p
		hsa-miR-15a-3p
		hsa-miR-655-5p
		hsa-miR-519c-5p
		hsa-miR-5008-3p
		hsa-miR-208b-3p
		hsa-miR-6086
		hsa-miR-873-5p.1
		hsa-miR-3529-3p
		hsa-miR-6500-5p
		hsa-miR-1302
		hsa-miR-3671
		hsa-miR-4502
mirDIP	12	hsa-miR-140-5p
		hsa-miR-330-5p
		hsa-miR-186-5p
		hsa-miR-218-5p
		hsa-miR-124-3p
		hsa-miR-449c-5p
		hsa-miR-145-5p
		hsa-miR-296-5p
		hsa-miR-429
		hsa-miR-122-5p
		hsa-miR-185-5p
		hsa-miR-9-5p
miRWalk	537	hsa-miR-548ao-3p
		hsa-miR-4493
		hsa-miR-374b-3p
		hsa-miR-448
		hsa-miR-6832-5p
		hsa-miR-5089-5p
		hsa-miR-648
		hsa-miR-6515-3p
		hsa-miR-675-3p
		hsa-miR-425-3p
		hsa-miR-4474-3p
		hsa-miR-6858-5p
		hsa-miR-6768-3p
		hsa-miR-4650-3p
		hsa-miR-6748-3p
		hsa-miR-1248
		hsa-miR-6794-5p
		hsa-miR-1306-3p
		hsa-miR-579-5p
		hsa-miR-496
		hsa-miR-6818-3p
		hsa-miR-3162-3p
		hsa-miR-424-3p
		hsa-miR-4799-5p
		hsa-miR-4634
		hsa-miR-449a
		hsa-miR-487b-3p
		hsa-miR-489-5p
		hsa-miR-3124-5p
		hsa-miR-4750-5p
		hsa-miR-191-3p
		hsa-miR-1301-5p
		hsa-miR-20a-3p
		hsa-miR-3938
		hsa-miR-7112-3p
		hsa-miR-4479
		hsa-miR-105-3p
		hsa-miR-6869-3p
		hsa-miR-4689
		hsa-miR-4436b-3p
		hsa-miR-4693-3p
		hsa-miR-7150
		hsa-miR-1228-3p
		hsa-miR-4286
		hsa-miR-1285-3p
		hsa-miR-1193
		hsa-miR-525-5p
		hsa-miR-5699-5p
		hsa-miR-3591-5p
		hsa-miR-6763-3p
		hsa-miR-3680-3p
		hsa-miR-4784
		hsa-miR-5011-3p
		hsa-miR-891a-5p
		hsa-miR-183-3p
		hsa-miR-378f
		hsa-miR-4712-5p
		hsa-miR-147b
		hsa-miR-4757-3p
		hsa-miR-4731-3p
		hsa-miR-580-5p
		hsa-miR-4714-5p
		hsa-miR-4519
		hsa-miR-513b-3p
		hsa-miR-6500-3p
		hsa-miR-372-5p
		hsa-miR-551b-3p
		hsa-miR-5739
		hsa-miR-6821-3p
		hsa-miR-378i
		hsa-miR-4508
		hsa-miR-1287-5p
		hsa-miR-127-3p
		hsa-miR-3613-5p
		hsa-miR-4718
		hsa-miR-325
		hsa-miR-4520-5p
		hsa-miR-4750-3p
		hsa-miR-3129-5p
		hsa-miR-3132
		hsa-miR-4662b
		hsa-miR-3142
		hsa-miR-6864-5p
		hsa-miR-6782-3p
		hsa-miR-491-3p
		hsa-miR-4659a-5p
		hsa-miR-5687
		hsa-miR-9-3p
		hsa-miR-6858-3p
		hsa-miR-634
		hsa-miR-4524b-5p
		hsa-miR-6797-3p
		hsa-miR-1914-5p
		hsa-miR-3197
		hsa-miR-6761-5p
		hsa-miR-181b-3p
		hsa-miR-571
		hsa-miR-492
		hsa-miR-3160-3p
		hsa-miR-126-3p
		hsa-miR-4742-5p
		hsa-miR-451a
		hsa-miR-3125
		hsa-miR-103a-3p
		hsa-miR-383-3p
		hsa-miR-518e-3p
		hsa-miR-6879-3p
		hsa-miR-4781-5p
		hsa-miR-585-3p
		hsa-miR-329-3p
		hsa-miR-224-5p
		hsa-miR-548ax
		hsa-miR-4442
		hsa-miR-548ay-5p
		hsa-miR-548j-5p
		hsa-miR-1236-5p
		hsa-miR-4330
		hsa-miR-6511b-3p
		hsa-miR-6750-5p
		hsa-miR-887-5p
		hsa-miR-7107-5p
		hsa-miR-614
		hsa-miR-3193
		hsa-miR-1304-3p
		hsa-miR-24-1-5p
		hsa-miR-5584-3p
		hsa-miR-3691-3p
		hsa-miR-6863
		hsa-miR-1244
		hsa-miR-548o-5p
		hsa-miR-367-3p
		hsa-miR-601
		hsa-miR-4327
		hsa-miR-4313
		hsa-miR-203b-5p
		hsa-miR-4317
		hsa-miR-3190-5p
		hsa-miR-155-5p
		hsa-miR-1247-3p
		hsa-miR-5707
		hsa-miR-500b-5p
		hsa-miR-192-3p
		hsa-miR-4296
		hsa-miR-517a-3p
		hsa-miR-2114-5p
		hsa-miR-517b-3p
		hsa-miR-6814-5p
		hsa-miR-875-5p
		hsa-miR-4256
		hsa-miR-6892-3p
		hsa-miR-4797-5p
		hsa-miR-6773-3p
		hsa-miR-378j
		hsa-miR-6839-5p
		hsa-miR-6788-3p
		hsa-miR-4800-3p
		hsa-miR-6513-3p
		hsa-miR-4524a-5p
		hsa-miR-28-3p
		hsa-miR-514b-5p
		hsa-miR-6516-5p
		hsa-miR-510-5p
		hsa-miR-6716-5p
		hsa-miR-301b-5p
		hsa-miR-6722-5p
		hsa-miR-6836-3p
		hsa-miR-6888-3p
		hsa-miR-6793-5p
		hsa-miR-1471
		hsa-miR-598-3p
		hsa-miR-548c-5p
		hsa-miR-3683
		hsa-miR-548ap-5p
		hsa-miR-3151-3p
		hsa-miR-550a-5p
		hsa-miR-6510-5p
		hsa-miR-3605-5p
		hsa-miR-215-3p
		hsa-miR-4713-3p
		hsa-miR-6513-5p
		hsa-miR-6872-5p
		hsa-miR-6516-3p
		hsa-miR-200b-3p
		hsa-miR-6499-5p
		hsa-miR-6870-3p
		hsa-miR-4788
		hsa-miR-590-5p
		hsa-miR-5192
		hsa-miR-148a-3p
		hsa-miR-6502-5p
		hsa-miR-622
		hsa-miR-6811-5p
		hsa-miR-6748-5p
		hsa-miR-4460
		hsa-miR-7156-5p
		hsa-miR-6802-3p
		hsa-miR-6780a-5p
		hsa-miR-4752
		hsa-miR-3923
		hsa-miR-1324
		hsa-miR-95-3p
		hsa-miR-4285
		hsa-miR-1178-3p
		hsa-miR-1208
		hsa-miR-34c-3p
		hsa-miR-6784-3p
		hsa-miR-921
		hsa-miR-4655-3p
		hsa-miR-1277-3p
		hsa-miR-4776-3p
		hsa-miR-3116
		hsa-miR-30c-2-3p
		hsa-miR-3139
		hsa-miR-5188
		hsa-miR-652-3p
		hsa-miR-4662a-5p
		hsa-miR-6764-3p
		hsa-miR-6740-3p
		hsa-miR-3714
		hsa-miR-592
		hsa-miR-6741-5p
		hsa-miR-8078
		hsa-miR-6814-3p
		hsa-miR-1292-3p
		hsa-miR-450b-3p
		hsa-miR-8058
		hsa-miR-642a-5p
		hsa-miR-3152-3p
		hsa-miR-3178
		hsa-miR-4716-5p
		hsa-miR-99b-5p
		hsa-miR-548au-5p
		hsa-miR-4322
		hsa-miR-6780a-3p
		hsa-miR-551a
		hsa-miR-891a-3p
		hsa-miR-5684
		hsa-miR-6777-3p
		hsa-miR-27b-5p
		hsa-miR-1227-3p
		hsa-miR-640
		hsa-miR-4273
		hsa-miR-525-3p
		hsa-miR-5091
		hsa-miR-4639-5p
		hsa-miR-6080
		hsa-miR-518d-3p
		hsa-miR-6815-5p
		hsa-miR-874-3p
		hsa-miR-523-3p
		hsa-miR-218-1-3p
		hsa-miR-4746-5p
		hsa-miR-376a-5p
		hsa-miR-152-5p
		hsa-miR-548ao-5p
		hsa-miR-103b
		hsa-miR-524-3p
		hsa-miR-6087
		hsa-miR-3141
		hsa-miR-4485-5p
		hsa-miR-513c-5p
		hsa-miR-4801
		hsa-miR-3935
		hsa-miR-602
		hsa-miR-668-5p
		hsa-miR-3689b-3p
		hsa-miR-187-5p
		hsa-miR-1225-3p
		hsa-miR-6850-3p
		hsa-miR-210-3p
		hsa-miR-2682-5p
		hsa-miR-5197-3p
		hsa-miR-3690
		hsa-miR-518a-3p
		hsa-miR-6786-3p
		hsa-miR-2909
		hsa-miR-4730
		hsa-miR-3680-5p
		hsa-miR-6506-3p
		hsa-miR-3977
		hsa-miR-5196-3p
		hsa-miR-2114-3p
		hsa-miR-370-5p
		hsa-miR-6760-3p
		hsa-miR-4421
		hsa-miR-3195
		hsa-miR-193a-5p
		hsa-miR-6834-3p
		hsa-miR-500a-5p
		hsa-miR-26a-2-3p
		hsa-miR-4677-3p
		hsa-miR-6730-3p
		hsa-miR-4671-5p
		hsa-miR-6826-5p
		hsa-miR-6836-5p
		hsa-miR-6515-5p
		hsa-miR-6078
		hsa-miR-8053
		hsa-miR-6890-3p
		hsa-miR-3149
		hsa-miR-3186-3p
		hsa-miR-381-5p
		hsa-miR-7848-3p
		hsa-miR-668-3p
		hsa-miR-342-3p
		hsa-miR-542-5p
		hsa-miR-1231
		hsa-miR-4255
		hsa-miR-199a-5p
		hsa-miR-6718-5p
		hsa-miR-339-3p
		hsa-miR-4419b
		hsa-miR-1271-3p
		hsa-miR-3925-3p
		hsa-miR-320e
		hsa-miR-3689a-3p
		hsa-miR-3678-3p
		hsa-miR-6731-3p
		hsa-miR-8086
		hsa-miR-548am-5p
		hsa-miR-4680-5p
		hsa-miR-518b
		hsa-miR-4783-5p
		hsa-miR-3655
		hsa-miR-3687
		hsa-miR-3131
		hsa-miR-1911-5p
		hsa-miR-550b-2-5p
		hsa-miR-6859-5p
		hsa-miR-2117
		hsa-miR-8074
		hsa-miR-6743-3p
		hsa-miR-511-5p
		hsa-miR-152-3p
		hsa-miR-1199-3p
		hsa-miR-6751-3p
		hsa-miR-517c-3p
		hsa-miR-1273g-3p
		hsa-miR-4679
		hsa-miR-4762-5p
		hsa-miR-548d-5p
		hsa-miR-26a-1-3p
		hsa-miR-3713
		hsa-miR-3157-5p
		hsa-miR-4677-5p
		hsa-miR-7705
		hsa-miR-6755-5p
		hsa-miR-4454
		hsa-miR-331-5p
		hsa-miR-198
		hsa-miR-612
		hsa-miR-548aq-5p
		hsa-miR-3689c
		hsa-miR-8082
		hsa-miR-6818-5p
		hsa-miR-6508-3p
		hsa-miR-7843-5p
		hsa-miR-422a
		hsa-miR-1263
		hsa-miR-1257
		hsa-miR-6512-3p
		hsa-miR-4711-5p
		hsa-miR-378a-3p
		hsa-miR-4728-3p
		hsa-miR-4478
		hsa-miR-6081
		hsa-miR-937-5p
		hsa-miR-181d-3p
		hsa-miR-7856-5p
		hsa-miR-1237-3p
		hsa-miR-8056
		hsa-miR-1284
		hsa-miR-556-5p
		hsa-miR-4705
		hsa-miR-5094
		hsa-miR-145-3p
		hsa-miR-2116-5p
		hsa-miR-1539
		hsa-miR-3675-3p
		hsa-miR-3607-5p
		hsa-miR-1271-5p
		hsa-miR-4462
		hsa-miR-4537
		hsa-miR-4450
		hsa-miR-4799-3p
		hsa-miR-487a-5p
		hsa-miR-3064-3p
		hsa-miR-548au-3p
		hsa-miR-7158-3p
		hsa-miR-8072
		hsa-miR-6728-5p
		hsa-miR-3688-3p
		hsa-miR-6851-5p
		hsa-miR-455-3p
		hsa-miR-5685
		hsa-miR-499b-5p
		hsa-miR-1287-3p
		hsa-miR-6882-5p
		hsa-miR-1908-3p
		hsa-miR-548h-5p
		hsa-miR-5007-5p
		hsa-miR-3916
		hsa-miR-4306
		hsa-miR-1254
		hsa-miR-6876-3p
		hsa-miR-1290
		hsa-miR-6831-5p
		hsa-miR-604
		hsa-miR-3907
		hsa-miR-196a-5p
		hsa-miR-6840-5p
		hsa-miR-363-3p
		hsa-miR-5683
		hsa-miR-6895-5p
		hsa-miR-22-5p
		hsa-miR-6070
		hsa-miR-6767-5p
		hsa-miR-6785-3p
		hsa-miR-548ak
		hsa-miR-5588-5p
		hsa-miR-504-5p
		hsa-miR-411-3p
		hsa-miR-514a-3p
		hsa-miR-6727-5p
		hsa-miR-4714-3p
		hsa-miR-4761-3p
		hsa-miR-1303
		hsa-miR-7161-3p
		hsa-miR-6800-5p
		hsa-miR-1182
		hsa-miR-299-5p
		hsa-miR-6788-5p
		hsa-miR-3137
		hsa-miR-548ad-3p
		hsa-miR-10b-3p
		hsa-miR-1273e
		hsa-miR-92a-3p
		hsa-miR-548i
		hsa-miR-6089
		hsa-miR-520a-5p
		hsa-miR-1178-5p
		hsa-miR-6715b-5p
		hsa-miR-6794-3p
		hsa-miR-6854-3p
		hsa-miR-6739-3p
		hsa-miR-3126-3p
		hsa-miR-5001-3p
		hsa-miR-7109-3p
		hsa-miR-362-5p
		hsa-miR-505-3p
		hsa-miR-3675-5p
		hsa-miR-550a-3-5p
		hsa-miR-1273a
		hsa-miR-204-3p
		hsa-miR-6886-5p
		hsa-miR-6824-3p
		hsa-miR-7641
		hsa-miR-1180-3p
		hsa-miR-664a-3p
		hsa-miR-4753-5p
		hsa-miR-6885-5p
		hsa-miR-503-5p
		hsa-miR-133a-5p
		hsa-miR-4536-3p
		hsa-miR-1273d
		hsa-miR-6750-3p
		hsa-miR-6778-3p
		hsa-miR-449b-5p
		hsa-miR-6719-3p
		hsa-miR-548w
		hsa-miR-616-3p
		hsa-miR-3651
		hsa-miR-6804-5p
		hsa-miR-4653-5p
		hsa-miR-516b-5p
		hsa-miR-184
		hsa-miR-328-5p
		hsa-miR-6819-3p
		hsa-miR-4704-5p
		hsa-miR-4790-3p
		hsa-miR-6082
		hsa-miR-4691-3p
		hsa-miR-3654
		hsa-miR-7114-3p
		hsa-miR-636
		hsa-miR-3174
		hsa-miR-934
		hsa-miR-3939
		hsa-miR-6823-5p
		hsa-miR-6868-5p
		hsa-miR-4742-3p
		hsa-miR-548bb-5p
		hsa-miR-609
		hsa-miR-6126
		hsa-miR-4440
		hsa-miR-378h
		hsa-miR-7976
		hsa-miR-4727-5p
		hsa-miR-550a-3p
		hsa-miR-3144-3p
		hsa-miR-8088
		hsa-miR-611
		hsa-miR-4700-3p
		hsa-miR-3929
		hsa-miR-125b-1-3p
		hsa-miR-4769-3p
		hsa-miR-548ab
		hsa-miR-219b-3p
		hsa-miR-374c-3p
		hsa-miR-6131
		hsa-miR-6822-5p
		hsa-miR-6729-3p
		hsa-miR-5689
		hsa-miR-412-3p
		hsa-miR-4639-3p
		hsa-miR-6865-5p
		hsa-miR-6720-3p
		hsa-miR-1973
		hsa-miR-6866-5p
		hsa-miR-107
		hsa-miR-3678-5p
		hsa-miR-3156-3p
		hsa-miR-4671-3p
		hsa-miR-933
		hsa-miR-518c-3p
		hsa-miR-3610
		hsa-miR-296-3p
		hsa-miR-6720-5p
		hsa-miR-487b-5p
		hsa-miR-8085
		hsa-miR-24-2-5p
		hsa-miR-4661-5p
		hsa-miR-558
		hsa-miR-514b-3p
		hsa-miR-7706
		hsa-miR-4294
		hsa-miR-512-5p
DIANA	13	hsa-miR-541-5p
		hsa-miR-519b-3p
		hsa-miR-6799-5p
		hsa-miR-1915-3p
		hsa-miR-216b-5p
		hsa-miR-6865-3p
		hsa-miR-1295b-5p
		hsa-miR-4632-5p
		hsa-miR-4429
		hsa-miR-323a-3p
		hsa-miR-519c-3p
		hsa-miR-4633-5p
		hsa-miR-320b
